# Supplementary material for: Discordant calls across genotype discovery approaches elucidate variants with systematic errors
Source: HighWire-hosted journal article supplement (doi:10.1101/gr.277908.123), 2023-05-30
Supplement: Supplemental_File_S1.xlsx [file Supplemental_File_S1.xlsx]

## Sheet: aou_bad_sites
Supplemental File S1. List of the 2,344 variants which were found to have Fisher’s exact test P<0.05 in the All of Us Research Program dataset.
locHG38	locHG19	Ref	Alt	ALT_AF_WGS	ALT_AF_WGA	p
chr1:102470054:A:T	1:102935610:A:T	A	T	0.238263	0.745501	5.40395e-31
chr1:105395840:C:A	1:105938462:C:A	C	A	0.483963	0.511745	0.0084203
chr1:105749829:A:C	1:106292451:A:C	A	C	0.0951099	0.907165	0.0167018
chr1:1088408:C:T	1:1023788:C:T	C	T	0.161374	0.846519	3.94134e-11
chr1:110131941:G:A	1:110674563:G:A	G	A	0.0737355	0.923173	0.00030713
chr1:111005720:A:C	1:111548342:A:C	A	C	0.545434	0.449708	0.00263044
chr1:112328671:T:A	1:112871293:T:A	T	A	0.149894	0.852808	0.0191467
chr1:113229895:G:A	1:113772517:G:A	G	A	0.084672	0.91329	0.0257018
chr1:113959268:C:T	1:114501890:C:T	C	T	0.0577039	0.944798	0.000934668
chr1:11707881:T:C	1:11767938:T:C	T	C	0.079487	0.922322	0.0384621
chr1:11731833:A:G	1:11791890:A:G	A	G	0.074816	0.927357	0.0107626
chr1:117618398:T:G	1:118161020:T:G	T	G	0.18378	0.821192	7.47188e-05
chr1:118368672:T:G	1:118911295:T:G	T	G	0.216296	0.780121	0.00767179
chr1:118464276:T:C	1:119006899:T:C	T	C	0.144563	0.859027	0.00163356
chr1:119714953:A:G	1:120257576:A:G	A	G	0.6868	0.317186	0.00838495
chr1:12539107:G:T	1:12599133:G:T	G	T	0.0690082	0.928149	0.000617195
chr1:12611698:T:C	1:12671703:T:C	T	C	0.61809	0.38733	0.000633206
chr1:12615695:G:A	1:12675699:G:A	G	A	0.339593	0.652918	1.27758e-06
chr1:13834756:G:A	1:14161251:G:A	G	A	0.184476	0.810666	0.000143703
chr1:14520305:C:A	1:14846801:C:A	C	A	0.419197	0.577503	0.0396832
chr1:14766273:C:T	1:15092769:C:T	C	T	0.110457	0.88576	0.000250211
chr1:147668399:T:G	1:147140519:T:G	T	G	0.0841532	0.917616	0.0493109
chr1:148939834:A:C	1:144944655:A:C	A	C	0.135024	0.871311	8.84049e-09
chr1:15151521:A:G	1:15478017:A:G	A	G	0.941786	0.0605346	0.00267264
chr1:151760851:T:C	1:151733327:T:C	T	C	0.0942038	0.908973	0.000781749
chr1:153435096:C:T	1:153407572:C:T	C	T	0.0939422	0.904005	0.0318972
chr1:153779663:T:C	1:153752139:T:C	T	C	0.463474	0.540875	0.00715859
chr1:15432730:C:G	1:15759226:C:G	C	G	0.390369	0.606339	0.0380591
chr1:154796698:C:T	1:154769174:C:T	C	T	0.147295	0.848119	8.65728e-05
chr1:15498700:T:C	1:15825195:T:C	T	C	0.29914	0.705232	0.00322764
chr1:156036539:G:T	1:156006330:G:T	G	T	0.0992531	0.908048	2.12964e-14
chr1:156242034:T:C	1:156211825:T:C	T	C	0.209759	0.792955	0.040131
chr1:157283868:A:T	1:157253658:A:T	A	T	0.111821	0.890397	0.0293965
chr1:159684505:GT:G	1:159654295:GT:G	GT	G	0.0650466	0.941315	4.85206e-16
chr1:16030027:A:G	1:16356522:A:G	A	G	0.0847012	0.918728	0.000129351
chr1:160351148:C:T	1:160320938:C:T	C	T	0.0525917	0.945458	0.00810143
chr1:161972719:T:C	1:161942509:T:C	T	C	0.930515	0.0712169	0.0379774
chr1:162070515:C:A	1:162040305:C:A	C	A	0.304348	0.691431	0.00479963
chr1:163425465:G:T	1:163395255:G:T	G	T	0.0628027	0.939022	0.0197142
chr1:163716126:G:A	1:163685359:G:A	G	A	0.0728211	0.924622	0.00285697
chr1:164687667:C:T	1:164656904:C:T	C	T	0.297193	0.709612	4.44126e-06
chr1:165447693:A:G	1:165416930:A:G	A	G	0.202854	0.799927	0.0329669
chr1:165720105:G:A	1:165689342:G:A	G	A	0.244848	0.758955	0.00633947
chr1:165871174:C:T	1:165840411:C:T	C	T	0.335678	0.660888	0.0249776
chr1:166829292:T:G	1:166798529:T:G	T	G	0.253823	0.749643	0.0142202
chr1:168645078:C:T	1:168614316:C:T	C	T	0.0588414	0.943254	0.00597339
chr1:171210148:C:T	1:171179287:C:T	C	T	0.311849	0.684688	0.0221376
chr1:17259639:A:G	1:17586134:A:G	A	G	0.0934535	0.908599	0.0288192
chr1:17388586:C:T	1:17715081:C:T	C	T	0.309099	0.682194	9.43264e-09
chr1:175418726:A:G	1:175387862:A:G	A	G	0.195305	0.81423	1.28779e-13
chr1:17566321:A:C	1:17892816:A:C	A	C	0.929604	0.0733078	0.000569398
chr1:177212211:C:A	1:177181347:C:A	C	A	0.309251	0.684718	6.36547e-05
chr1:177999370:T:C	1:177968505:T:C	T	C	0.0768568	0.926821	2.0525e-05
chr1:179998295:T:C	1:179967430:T:C	T	C	0.13595	0.867496	0.00194405
chr1:181447202:T:C	1:181416338:T:C	T	C	0.390996	0.520641	0
chr1:181477645:C:T	1:181446781:C:T	C	T	0.125001	0.872578	0.0252287
chr1:182130012:G:T	1:182099147:G:T	G	T	0.206906	0.798199	9.85118e-05
chr1:18342391:G:A	1:18668885:G:A	G	A	0.361423	0.630283	1.33198e-07
chr1:183576926:G:A	1:183546061:G:A	G	A	0.348371	0.647005	0.00291596
chr1:18444177:A:G	1:18770671:A:G	A	G	0.350698	0.644934	0.00524571
chr1:186870729:G:A	1:186839861:G:A	G	A	0.230786	0.773496	0.00172249
chr1:18692857:A:G	1:19019351:A:G	A	G	0.207846	0.797606	3.19013e-05
chr1:18787807:G:T	1:19114301:G:T	G	T	0.0787714	0.923674	0.0051028
chr1:18854899:T:C	1:19181393:T:C	T	C	0.312314	0.691105	0.0230111
chr1:188654698:A:C	1:188623829:A:C	A	C	0.258987	0.749209	8.35203e-09
chr1:18914127:G:A	1:19240621:G:A	G	A	0.278251	0.716903	0.000974792
chr1:190590374:A:G	1:190559504:A:G	A	G	0.846486	0.137752	2.44836e-43
chr1:191350313:C:T	1:191319443:C:T	C	T	0.150527	0.852429	0.0107363
chr1:197893468:G:T	1:197862598:G:T	G	T	0.415479	0.578062	5.65973e-05
chr1:200722891:A:T	1:200692019:A:T	A	T	0.590368	0.405142	0.00483455
chr1:201800318:A:G	1:201769446:A:G	A	G	0.0638963	0.938538	0.00208033
chr1:20279827:G:A	1:20606320:G:A	G	A	0.431814	0.558828	7.79096e-09
chr1:203053994:A:C	1:203023122:A:C	A	C	0.237779	0.777897	5.85266e-30
chr1:204032055:G:A	1:204001183:G:A	G	A	0.933916	0.0644636	0.0428418
chr1:204638280:T:C	1:204607408:T:C	T	C	0.35546	0.651049	2.95819e-05
chr1:204907941:T:C	1:204877069:T:C	T	C	0.462271	0.553296	1.93674e-21
chr1:204943715:G:A	1:204912843:G:A	G	A	0.256028	0.738846	0.000323384
chr1:205646819:C:A	1:205615947:C:A	C	A	0.861349	0.134086	3.99412e-05
chr1:206666424:C:T	1:206839769:C:T	C	T	0.240369	0.753649	2.01646e-05
chr1:208112991:T:C	1:208286336:T:C	T	C	0.0789672	0.923186	0.0138231
chr1:208592127:T:C	1:208765472:T:C	T	C	0.48096	0.523044	0.0136624
chr1:208795064:T:G	1:208968409:T:G	T	G	0.160844	0.845719	3.65068e-08
chr1:209786527:G:A	1:209959872:G:A	G	A	0.807683	0.189732	0.0426919
chr1:21577774:A:G	1:21904267:A:G	A	G	0.867787	0.134649	0.0277533
chr1:216542172:G:T	1:216715514:G:T	G	T	0.413753	0.590468	0.0082376
chr1:217076993:G:A	1:217250335:G:A	G	A	0.286714	0.708636	0.00164022
chr1:217370765:T:A	1:217544107:T:A	T	A	0.233197	0.770214	0.0128194
chr1:218882658:C:T	1:219056000:C:T	C	T	0.243493	0.748895	6.36205e-08
chr1:221174029:A:T	1:221347371:A:T	A	T	0.30955	0.684255	4.0683e-05
chr1:221439292:G:A	1:221612634:G:A	G	A	0.0589543	0.93915	0.0145958
chr1:22252513:C:T	1:22579006:C:T	C	T	0.216908	0.779204	0.00384591
chr1:223317782:C:T	1:223491124:C:T	C	T	0.148427	0.854193	0.0229273
chr1:223388460:C:T	1:223561802:C:T	C	T	0.667343	0.324516	1.10102e-07
chr1:223478441:C:T	1:223651783:C:T	C	T	0.248088	0.748748	0.0244491
chr1:223539520:C:A	1:223712863:C:A	C	A	0.0933121	0.912026	1.48931e-08
chr1:224173190:A:G	1:224360892:A:G	A	G	0.478236	0.526635	0.00271478
chr1:227410468:G:A	1:227598169:G:A	G	A	0.80915	0.183061	7.80839e-10
chr1:227480035:T:C	1:227667736:T:C	T	C	0.15752	0.846637	0.000405766
chr1:227915727:G:C	1:228103428:G:C	G	C	0.580007	0.427439	3.46901e-06
chr1:2280410:A:G	1:2211849:A:G	A	G	0.591154	0.418185	6.35529e-09
chr1:2299360:T:C	1:2230799:T:C	T	C	0.388683	0.61731	0.000153843
chr1:230105407:G:C	1:230241154:G:C	G	C	0.46766	0.522746	3.60412e-09
chr1:230502927:C:A	1:230638673:C:A	C	A	0.0591439	0.942983	0.00535774
chr1:23278451:T:G	1:23604944:T:G	T	G	0.0856714	0.916538	0.0144635
chr1:234345809:C:A	1:234481555:C:A	C	A	0.280644	0.715306	0.00562601
chr1:23560444:T:G	1:23886935:T:G	T	G	0.559805	0.443726	0.0283918
chr1:235698592:C:A	1:235861892:C:A	C	A	0.54559	0.448459	0.000244087
chr1:235930787:A:G	1:236094087:A:G	A	G	0.892054	0.111047	0.0023208
chr1:240536514:A:G	1:240699814:A:G	A	G	0.237958	0.758369	0.0083756
chr1:24093006:A:G	1:24419496:A:G	A	G	0.43969	0.564782	0.00549677
chr1:241235966:A:C	1:241399266:A:C	A	C	0.184059	0.828752	1.99412e-24
chr1:241324341:A:C	1:241487641:A:C	A	C	0.204479	0.763119	6.7336e-126
chr1:242789190:T:C	1:242952492:T:C	T	C	0.605308	0.511486	0
chr1:24465427:A:G	1:24791917:A:G	A	G	0.325285	0.683066	4.17577e-08
chr1:245190644:T:G	1:245353946:T:G	T	G	0.0936821	0.912284	2.41669e-10
chr1:245977405:A:G	1:246140707:A:G	A	G	0.160287	0.846479	1.16055e-08
chr1:246659320:T:C	1:246822622:T:C	T	C	0.295196	0.71373	1.63715e-09
chr1:246675749:T:C	1:246839051:T:C	T	C	0.215666	0.790655	2.28695e-06
chr1:247348861:C:A	1:247512163:C:A	C	A	0.0689269	0.929057	0.0155103
chr1:25037850:C:G	1:25364341:C:G	C	G	0.553082	0.455157	3.46691e-07
chr1:25091519:G:A	1:25418010:G:A	G	A	0.672894	0.322571	0.0028902
chr1:31815009:T:C	1:32280610:T:C	T	C	0.66338	0.342047	0.000428341
chr1:32321244:T:A	1:32786845:T:A	T	A	0.107385	0.889304	0.00108836
chr1:33241091:G:C	1:33706692:G:C	G	C	0.232041	0.758401	5.36629e-12
chr1:3378408:G:A	1:3294972:G:A	G	A	0.691081	0.303839	0.000717582
chr1:34928664:G:A	1:35394265:G:A	G	A	0.0549081	0.942395	0.000359299
chr1:3521371:T:C	1:3437935:T:C	T	C	0.570997	0.436811	1.43577e-06
chr1:39480658:A:T	1:39946330:A:T	A	T	0.941938	0.0564876	0.0367888
chr1:39490244:G:A	1:39955916:G:A	G	A	0.94266	0.0557864	0.0381041
chr1:40554253:G:T	1:41019925:G:T	G	T	0.119859	0.886087	1.20124e-08
chr1:44416699:G:A	1:44882371:G:A	G	A	0.067265	0.934562	0.0239232
chr1:44501759:T:C	1:44967431:T:C	T	C	0.265981	0.737318	0.0211388
chr1:4488232:G:A	1:4548292:G:A	G	A	0.0784524	0.918984	0.0038316
chr1:45760677:A:G	1:46226349:A:G	A	G	0.285212	0.724626	1.75262e-11
chr1:45941636:C:T	1:46407308:C:T	C	T	0.287015	0.708677	0.00347096
chr1:46490563:G:A	1:46956235:G:A	G	A	0.830111	0.166892	0.0137134
chr1:50358609:C:T	1:50824281:C:T	C	T	0.0804835	0.916611	0.00117794
chr1:5091377:A:C	1:5151437:A:C	A	C	0.102048	0.902313	8.75882e-06
chr1:52741321:A:T	1:53206993:A:T	A	T	0.500758	0.495494	0.0210198
chr1:5289556:G:A	1:5349616:G:A	G	A	0.211357	0.785454	0.0168623
chr1:5331212:T:G	1:5391272:T:G	T	G	0.441368	0.566254	2.37648e-06
chr1:54755238:T:G	1:55220911:T:G	T	G	0.227634	0.775936	0.00856518
chr1:57415286:T:C	1:57880958:T:C	T	C	0.0965161	0.907287	7.27809e-05
chr1:57791237:T:G	1:58256909:T:G	T	G	0.800547	0.202014	0.0494866
chr1:59763182:G:A	1:60228854:G:A	G	A	0.140051	0.856907	0.00744321
chr1:61759364:T:A	1:62225036:T:A	T	A	0.0822172	0.920549	0.00189655
chr1:64444078:A:T	1:64909761:A:T	A	T	0.117036	0.887184	5.14577e-05
chr1:66382293:A:G	1:66847976:A:G	A	G	0.314579	0.693838	2.53533e-08
chr1:6730886:A:G	1:6790946:A:G	A	G	0.629887	0.374632	0.004058
chr1:68262835:C:T	1:68728518:C:T	C	T	0.289005	0.71969	3.44641e-09
chr1:71496603:T:A	1:71962286:T:A	T	A	0.068991	0.933746	0.000862637
chr1:73349602:G:T	1:73815285:G:T	G	T	0.0634612	0.934836	0.0324689
chr1:74733056:A:C	1:75198740:A:C	A	C	0.688358	0.308044	0.0164437
chr1:77237466:C:A	1:77703151:C:A	C	A	0.808933	0.19422	0.0136175
chr1:77456929:A:T	1:77922614:A:T	A	T	0.0581977	0.940103	0.0274944
chr1:78976805:A:T	1:79442490:A:T	A	T	0.0820229	0.916146	0.0416579
chr1:79021395:T:C	1:79487080:T:C	T	C	0.728063	0.281672	2.85978e-11
chr1:81618055:T:C	1:82083740:T:C	T	C	0.200631	0.803515	0.00139627
chr1:81640357:G:A	1:82106042:G:A	G	A	0.370966	0.624355	0.00291853
chr1:82243580:A:T	1:82709264:A:T	A	T	0.540579	0.453764	0.000487082
chr1:83237529:A:G	1:83703212:A:G	A	G	0.39388	0.609814	0.0197582
chr1:83397713:T:C	1:83863396:T:C	T	C	0.194931	0.809224	0.00115986
chr1:83831530:T:C	1:84297213:T:C	T	C	0.13269	0.872581	1.51131e-06
chr1:86616563:A:T	1:87082246:A:T	A	T	0.422748	0.582048	0.00276035
chr1:88178289:G:A	1:88643972:G:A	G	A	0.307291	0.699457	6.53073e-06
chr1:8957032:C:T	1:9017091:C:T	C	T	0.189646	0.806929	0.00742204
chr1:90836250:A:G	1:91301807:A:G	A	G	0.282888	0.723768	5.06013e-06
chr1:9598649:G:A	1:9658707:G:A	G	A	0.77888	0.216027	0.000170079
chr1:97535833:C:A	1:98001389:C:A	C	A	0.265435	0.730342	0.00342756
chr1:98157418:C:T	1:98622974:C:T	C	T	0.0543396	0.947784	0.00362912
chr10:100726389:C:T	10:102486146:C:T	C	T	0.0553905	0.942585	0.00728223
chr10:100742391:A:G	10:102502148:A:G	A	G	0.792836	0.210122	0.0252043
chr10:103455175:T:C	10:105214932:T:C	T	C	0.355929	0.648068	0.0103419
chr10:104519244:C:G	10:106279002:C:G	C	G	0.370527	0.640795	5.5098e-13
chr10:105095699:G:A	10:106855457:G:A	G	A	0.103448	0.893085	0.000490489
chr10:107038334:A:G	10:108798092:A:G	A	G	0.113822	0.888615	0.0179681
chr10:112449777:C:T	10:114209535:C:T	C	T	0.072923	0.929844	0.00102684
chr10:116591437:A:G	10:118350949:A:G	A	G	0.0550813	0.947433	0.000587248
chr10:118818770:G:A	10:120578282:G:A	G	A	0.0661216	0.930882	0.000268495
chr10:118994421:C:A	10:120753933:C:A	C	A	0.315645	0.678533	0.000124748
chr10:119964971:A:C	10:121724483:A:C	A	C	0.87097	0.131737	0.0138082
chr10:120591380:C:T	10:122350892:C:T	C	T	0.102731	0.894656	0.0088386
chr10:122184974:T:G	10:123944489:T:G	T	G	0.908346	0.0937678	0.0255073
chr10:122354916:G:A	10:124114432:G:A	G	A	0.605862	0.38155	3.11005e-15
chr10:122459759:C:G	10:124219275:C:G	C	G	0.234761	0.762413	0.0408056
chr10:123648711:T:C	10:125408227:T:C	T	C	0.0770784	0.925046	0.013722
chr10:123886265:A:C	10:125645781:A:C	A	C	0.149167	0.85664	4.90123e-07
chr10:124434945:T:C	10:126123514:T:C	T	C	0.0602881	0.941506	0.020135
chr10:124606098:G:A	10:126294667:G:A	G	A	0.729076	0.265342	0.000105886
chr10:124609616:T:G	10:126298185:T:G	T	G	0.242515	0.76501	6.29877e-08
chr10:125565861:A:G	10:127254430:A:G	A	G	0.188303	0.819573	5.34207e-10
chr10:127394384:T:C	10:129192648:T:C	T	C	0.0776619	0.924142	0.0376991
chr10:127429854:A:G	10:129228118:A:G	A	G	0.893492	0.0982687	4.45966e-17
chr10:127484108:C:A	10:129282372:C:A	C	A	0.0822314	0.920109	0.00862651
chr10:12828335:C:T	10:12870334:C:T	C	T	0.5239	0.481437	0.000986944
chr10:129780525:A:C	10:131578789:A:C	A	C	0.733584	0.269393	0.0389172
chr10:129921215:T:G	10:131719479:T:G	T	G	0.109955	0.888049	0.0497867
chr10:130017691:A:T	10:131815955:A:T	A	T	0.709467	0.299515	1.70537e-09
chr10:130395494:A:C	10:132193758:A:C	A	C	0.0632755	0.942566	4.10841e-14
chr10:130636717:T:C	10:132434981:T:C	T	C	0.48219	0.522676	0.00268867
chr10:131546489:A:G	10:133344752:A:G	A	G	0.841913	0.161754	0.00216815
chr10:131734760:T:C	10:133567096:T:C	T	C	0.261897	0.745402	3.33214e-07
chr10:13219415:A:T	10:13261415:A:T	A	T	0.0813378	0.922979	1.04243e-06
chr10:13280645:C:A	10:13322645:C:A	C	A	0.196902	0.799683	0.00850745
chr10:132806892:G:A	10:134620396:G:A	G	A	0.132145	0.864949	0.00867588
chr10:133014427:G:A	10:134827931:G:A	G	A	0.396868	0.597564	0.000483504
chr10:133016173:G:A	10:134829677:G:A	G	A	0.0750832	0.926898	0.0197759
chr10:133226779:A:G	10:135040283:A:G	A	G	0.479376	0.524601	0.0144436
chr10:133552130:C:A	10:135365634:C:A	C	A	0.13113	0.865189	0.000882796
chr10:1463744:G:A	10:1505939:G:A	G	A	0.234165	0.746888	2.19073e-42
chr10:15111520:A:G	10:15153519:A:G	A	G	0.0787648	0.924624	0.000101735
chr10:1606373:C:G	10:1648568:C:G	C	G	0.133992	0.868198	0.0469863
chr10:17552053:G:A	10:17594052:G:A	G	A	0.0567785	0.941338	0.0137544
chr10:17731390:T:C	10:17773389:T:C	T	C	0.147672	0.855148	0.0140758
chr10:17936017:T:G	10:18224946:T:G	T	G	0.348021	0.662042	8.09144e-11
chr10:18525048:A:C	10:18813977:A:C	A	C	0.366549	0.628569	0.00184443
chr10:18820748:A:T	10:19109677:A:T	A	T	0.299913	0.70389	0.0105621
chr10:20140443:G:A	10:20429372:G:A	G	A	0.94103	0.0566552	0.00222642
chr10:2250490:C:T	10:2292684:C:T	C	T	0.32399	0.679616	0.0174483
chr10:2493467:C:A	10:2535659:C:A	C	A	0.0773942	0.926518	6.31782e-06
chr10:25366848:A:G	10:25655777:A:G	A	G	0.0839534	0.920195	3.94526e-06
chr10:2595149:G:A	10:2637341:G:A	G	A	0.0517757	0.946731	0.0404001
chr10:26304795:G:A	10:26593724:G:A	G	A	0.208992	0.787552	0.00917576
chr10:26527612:T:C	10:26816541:T:C	T	C	0.238744	0.772838	6.1301e-17
chr10:26866714:T:C	10:27155643:T:C	T	C	0.25647	0.753173	1.28959e-11
chr10:29145074:G:A	10:29434003:G:A	G	A	0.106164	0.89601	0.028793
chr10:29180500:C:T	10:29469429:C:T	C	T	0.176616	0.831304	1.60509e-10
chr10:29470296:A:G	10:29759225:A:G	A	G	0.232946	0.769834	0.042228
chr10:30611750:A:G	10:30900679:A:G	A	G	0.150076	0.855052	9.32581e-06
chr10:3090753:C:T	10:3132945:C:T	C	T	0.312813	0.683186	0.00821075
chr10:32975252:A:G	10:33264180:A:G	A	G	0.191761	0.817565	2.85827e-13
chr10:33064915:C:A	10:33353843:C:A	C	A	0.311953	0.679521	1.85616e-08
chr10:33662802:A:C	10:33951730:A:C	A	C	0.157149	0.838242	0.000118267
chr10:36660204:G:A	10:36949132:G:A	G	A	0.676935	0.319191	0.0109628
chr10:37513604:G:A	10:37802532:G:A	G	A	0.557698	0.438132	0.00970133
chr10:37548585:G:A	10:37837513:G:A	G	A	0.0952769	0.907851	0.000945088
chr10:38094829:T:C	10:38383757:T:C	T	C	0.499152	0.504903	0.0124945
chr10:38214731:A:T	10:38503659:A:T	A	T	0.122925	0.8799	0.00778002
chr10:38253093:A:G	10:38542021:A:G	A	G	0.193499	0.809831	0.00919716
chr10:38293210:A:T	10:38582138:A:T	A	T	0.510977	0.47644	1.3703e-14
chr10:38329825:A:G	10:38618753:A:G	A	G	0.127967	0.874664	0.0146755
chr10:38521950:G:T	10:38810878:G:T	G	T	0.4764	0.530459	2.69026e-05
chr10:38812009:A:C	10:39105140:A:C	A	C	0.525977	0.478393	0.00701127
chr10:38812879:C:T	10:39106010:C:T	C	T	0.224197	0.784939	1.73122e-11
chr10:38832067:T:C	10:39125198:T:C	T	C	0.515252	0.493768	3.15671e-08
chr10:41730415:G:A	10:42509794:G:A	G	A	0.570333	0.425265	0.00623497
chr10:42397905:T:C	10:42893353:T:C	T	C	0.342567	0.654356	0.0466872
chr10:42890633:A:G	10:43386081:A:G	A	G	0.209494	0.795972	3.24386e-05
chr10:42988523:T:C	10:43483971:T:C	T	C	0.140064	0.862488	0.0230258
chr10:45518099:G:A	10:46013547:G:A	G	A	0.0598044	0.93739	0.000337143
chr10:45526790:T:C	10:46022238:T:C	T	C	0.0602605	0.941689	0.0109721
chr10:45557613:G:A	10:46053061:G:A	G	A	0.0598253	0.94227	0.00602232
chr10:48689174:C:A	10:49897219:C:A	C	A	0.273128	0.732226	0.000204837
chr10:49615784:G:A	10:50823830:G:A	G	A	0.100235	0.895947	0.000116516
chr10:49886614:C:T	10:51094660:C:T	C	T	0.2855	0.710429	0.00569236
chr10:5003508:A:G	10:5045700:A:G	A	G	0.0864555	0.922341	6.50902e-23
chr10:50449629:T:G	10:52209389:T:G	T	G	0.363126	0.643815	8.70819e-06
chr10:5079553:C:A	10:5121745:C:A	C	A	0.325541	0.680305	0.000119497
chr10:53920600:G:A	10:55680360:G:A	G	A	0.0882922	0.913693	0.0301151
chr10:5454734:A:C	10:5496697:A:C	A	C	0.665668	0.346507	4.21848e-15
chr10:56999961:G:A	10:58759721:G:A	G	A	0.12415	0.88138	1.6546e-07
chr10:57243325:A:G	10:59003085:A:G	A	G	0.141639	0.853555	2.87685e-05
chr10:59393888:T:G	10:61153646:T:G	T	G	0.891037	0.0922652	5.12503e-66
chr10:63976980:C:T	10:65736740:C:T	C	T	0.0916095	0.90647	0.0419908
chr10:64683183:T:A	10:66442940:T:A	T	A	0.087635	0.903744	4.46323e-20
chr10:64735832:C:G	10:66495589:C:G	C	G	0.150316	0.846817	0.0140398
chr10:68984923:A:G	10:70744679:A:G	A	G	0.0568571	0.945802	0.0003453
chr10:69333636:C:T	10:71093392:C:T	C	T	0.126608	0.871042	0.031725
chr10:69460012:T:C	10:71219768:T:C	T	C	0.418908	0.601025	4.14317e-35
chr10:70619654:T:A	10:72379410:T:A	T	A	0.335159	0.670387	0.000293523
chr10:75058319:C:T	10:76818077:C:T	C	T	0.0689105	0.933298	0.00669579
chr10:78282055:A:G	10:80041812:A:G	A	G	0.150952	0.853188	0.000336849
chr10:78816239:T:C	10:80575996:T:C	T	C	0.376503	0.628503	0.00146822
chr10:78981237:G:C	10:80740994:G:C	G	C	0.172935	0.830114	0.012697
chr10:79215686:G:A	10:80975443:G:A	G	A	0.66931	0.320641	4.98415e-11
chr10:79263945:C:G	10:81023702:C:G	C	G	0.0543764	0.948689	2.34354e-05
chr10:79412209:A:C	10:81171965:A:C	A	C	0.0639998	0.938989	0.000140558
chr10:83218580:C:T	10:84978336:C:T	C	T	0.101454	0.901412	0.00323929
chr10:8423181:G:A	10:8465144:G:A	G	A	0.0773351	0.920129	0.00393213
chr10:86467677:T:A	10:88227434:T:A	T	A	0.354124	0.629292	4.41257e-25
chr10:86573217:C:T	10:88332974:C:T	C	T	0.16549	0.830661	0.00155841
chr10:87740165:T:C	10:89499922:T:C	T	C	0.0773991	0.924385	0.0391656
chr10:90543296:T:A	10:92303053:T:A	T	A	0.804671	0.199985	0.000336245
chr10:95292537:T:C	10:97052294:T:C	T	C	0.811194	0.19197	0.0131875
chr10:95713053:T:A	10:97472810:T:A	T	A	0.0981738	0.905146	0.000582231
chr10:97060557:G:A	10:98820314:G:A	G	A	0.0695807	0.932212	0.0295748
chr10:99506760:C:T	10:101266517:C:T	C	T	0.782345	0.221278	0.00694867
chr11:102718114:A:C	11:102588845:A:C	A	C	0.0519039	0.908573	0
chr11:103652614:T:C	11:103523342:T:C	T	C	0.825564	0.182545	9.04397e-11
chr11:10497068:G:A	11:10518615:G:A	G	A	0.0815305	0.915278	0.000411583
chr11:105864367:C:T	11:105735093:C:T	C	T	0.263757	0.731191	0.00044544
chr11:107551714:T:A	11:107422440:T:A	T	A	0.195393	0.800705	0.00289667
chr11:110320377:G:A	11:110191102:G:A	G	A	0.734281	0.260945	0.000819478
chr11:110773297:T:G	11:110644020:T:G	T	G	0.239155	0.770253	1.07485e-11
chr11:11179987:A:C	11:11201534:A:C	A	C	0.593384	0.41059	0.0131908
chr11:11239924:T:A	11:11261471:T:A	T	A	0.389686	0.614556	0.00727833
chr11:11294625:A:C	11:11316172:A:C	A	C	0.303607	0.7063	3.29121e-11
chr11:113045845:T:G	11:112916567:T:G	T	G	0.453504	0.539131	5.18172e-06
chr11:113435709:C:T	11:113306431:C:T	C	T	0.142172	0.861617	0.000844886
chr11:115557176:C:A	11:115427894:C:A	C	A	0.819583	0.183072	0.0344137
chr11:116567025:G:A	11:116437742:G:A	G	A	0.0521401	0.949885	0.00493567
chr11:116642471:T:C	11:116513188:T:C	T	C	0.0672745	0.936782	4.40095e-07
chr11:117596400:A:G	11:117467115:A:G	A	G	0.243221	0.753446	0.0173782
chr11:117874288:G:A	11:117745003:G:A	G	A	0.314622	0.68032	0.000819944
chr11:117986623:G:C	11:117857338:G:C	G	C	0.127173	0.87569	0.0078111
chr11:118741072:G:A	11:118611781:G:A	G	A	0.237553	0.76881	4.04356e-06
chr11:119078621:C:T	11:118949331:C:T	C	T	0.377395	0.614838	9.01504e-07
chr11:119347832:T:C	11:119218542:T:C	T	C	0.586652	0.421899	9.84319e-08
chr11:12180343:G:A	11:12201890:G:A	G	A	0.677607	0.316573	0.00011904
chr11:124408336:T:C	11:124278232:T:C	T	C	0.113894	0.889526	0.000831191
chr11:12527517:C:T	11:12549064:C:T	C	T	0.304071	0.692237	0.0139204
chr11:125947716:T:C	11:125817611:T:C	T	C	0.285322	0.720092	0.000216328
chr11:126116382:G:T	11:125986277:G:T	G	T	0.584755	0.409495	0.000329105
chr11:126654356:T:C	11:126524251:T:C	T	C	0.300339	0.708959	4.22142e-10
chr11:127553402:T:A	11:127423297:T:A	T	A	0.485252	0.528349	8.84163e-17
chr11:127843720:G:A	11:127713615:G:A	G	A	0.362166	0.641101	0.0365642
chr11:128920872:A:G	11:128790767:A:G	A	G	0.832472	0.173077	6.09948e-06
chr11:129923410:A:G	11:129793305:A:G	A	G	0.296147	0.720387	5.98964e-29
chr11:130140904:T:C	11:130010799:T:C	T	C	0.0797086	0.924194	8.64344e-06
chr11:131788915:T:G	11:131658809:T:G	T	G	0.114002	0.898534	2.59097e-35
chr11:132278710:C:T	11:132148604:C:T	C	T	0.341497	0.666403	2.84634e-07
chr11:132692230:A:C	11:132562125:A:C	A	C	0.489908	0.519871	1.78046e-09
chr11:134395227:C:T	11:134265121:C:T	C	T	0.13422	0.86236	0.00227321
chr11:1523692:G:T	11:1544922:G:T	G	T	0.0668497	0.930791	0.00414526
chr11:1638580:G:A	11:1659810:G:A	G	A	0.448687	0.54487	7.11944e-05
chr11:17431896:C:T	11:17453443:C:T	C	T	0.159265	0.838193	0.0332671
chr11:17647195:G:A	11:17668742:G:A	G	A	0.17146	0.834867	2.2642e-07
chr11:18409718:C:T	11:18431265:C:T	C	T	0.126491	0.861594	3.90784e-27
chr11:18425556:T:G	11:18447103:T:G	T	G	0.156568	0.846683	0.00603889
chr11:23139790:A:T	11:23161336:A:T	A	T	0.0795312	0.918658	0.0414777
chr11:23508347:A:T	11:23529893:A:T	A	T	0.304362	0.687968	3.22877e-07
chr11:2472787:T:C	11:2494017:T:C	T	C	0.773187	0.230468	0.00744416
chr11:2487043:A:G	11:2508273:A:G	A	G	0.17302	0.842591	9.334e-38
chr11:25743637:A:G	11:25765184:A:G	A	G	0.764263	0.242969	2.23835e-07
chr11:25867953:G:A	11:25889500:G:A	G	A	0.326517	0.678342	0.00140029
chr11:26006122:C:T	11:26027669:C:T	C	T	0.0691313	0.928492	0.00449173
chr11:26552746:A:C	11:26574293:A:C	A	C	0.663878	0.339723	0.018836
chr11:27226921:T:C	11:27248468:T:C	T	C	0.0547643	0.947011	0.016143
chr11:297603:A:T	11:297603:A:T	A	T	0.25202	0.75255	0.00115858
chr11:30584312:C:G	11:30605859:C:G	C	G	0.19587	0.808096	0.00204254
chr11:3146288:A:G	11:3167518:A:G	A	G	0.134109	0.871307	8.30779e-07
chr11:32580432:T:C	11:32601978:T:C	T	C	0.0816759	0.922065	2.53842e-05
chr11:33658703:G:A	11:33680249:G:A	G	A	0.271884	0.725185	0.0432617
chr11:34194791:T:C	11:34216338:T:C	T	C	0.174014	0.830042	0.000959004
chr11:34223626:T:C	11:34245173:T:C	T	C	0.84514	0.14964	7.18573e-06
chr11:45676109:C:A	11:45697659:C:A	C	A	0.592439	0.403709	0.0157043
chr11:45839164:A:T	11:45860715:A:T	A	T	0.055904	0.92899	4.71284e-80
chr11:4600093:T:G	11:4621323:T:G	T	G	0.316065	0.673613	1.12414e-11
chr11:46301658:G:A	11:46323209:G:A	G	A	0.320208	0.689791	6.25547e-11
chr11:47185811:G:A	11:47207362:G:A	G	A	0.0882839	0.908347	0.00032711
chr11:4745247:C:T	11:4766477:C:T	C	T	0.109395	0.897203	3.53541e-11
chr11:48353683:G:A	11:48375235:G:A	G	A	0.0636755	0.938443	0.00731907
chr11:538940:G:A	11:538940:G:A	G	A	0.353244	0.642323	0.00456064
chr11:5555190:G:C	11:5576420:G:C	G	C	0.0581637	0.94348	0.0304034
chr11:56139360:A:T	11:55906836:A:T	A	T	0.0746914	0.92852	0.000152717
chr11:566936:C:A	11:566936:C:A	C	A	0.212537	0.783146	0.00124603
chr11:5760899:C:A	11:5782129:C:A	C	A	0.176454	0.82966	7.10073e-07
chr11:5816805:T:C	11:5838035:T:C	T	C	0.0620253	0.940131	0.00552344
chr11:5869589:T:G	11:5890819:T:G	T	G	0.388179	0.616046	0.00751844
chr11:60798448:C:T	11:60565921:C:T	C	T	0.0745541	0.923752	0.0491643
chr11:60992375:G:A	11:60759847:G:A	G	A	0.0705439	0.927401	0.0145942
chr11:61697053:C:T	11:61464525:C:T	C	T	0.386449	0.60932	0.00751664
chr11:61930186:A:G	11:61697658:A:G	A	G	0.381014	0.624839	0.000210725
chr11:65691933:T:C	11:65459404:T:C	T	C	0.521032	0.482815	0.0178571
chr11:66738231:C:A	11:66505702:C:A	C	A	0.243266	0.772347	3.6386e-29
chr11:6701463:A:T	11:6722694:A:T	A	T	0.117295	0.884771	0.0470107
chr11:68398181:T:G	11:68165649:T:G	T	G	0.0660375	0.935845	0.0184764
chr11:6897410:T:C	11:6918641:T:C	T	C	0.396472	0.607756	0.00771138
chr11:69296261:G:C	11:69063728:G:C	G	C	0.126781	0.875736	0.0205433
chr11:69435230:C:T	11:69249998:C:T	C	T	0.0626236	0.939365	0.0117476
chr11:69631563:G:A	11:69446331:G:A	G	A	0.0549027	0.946786	0.0223084
chr11:70087979:G:A	11:69934085:G:A	G	A	0.257365	0.739746	0.0422414
chr11:70128374:A:G	11:69974480:A:G	A	G	0.802511	0.201152	0.00487947
chr11:70658356:G:A	11:70504461:G:A	G	A	0.0576641	0.943987	0.02864
chr11:71327082:C:T	11:71038128:C:T	C	T	0.202337	0.794062	0.00621248
chr11:71376288:C:A	11:71087334:C:A	C	A	0.290305	0.72346	1.08056e-20
chr11:75613554:G:A	11:75324599:G:A	G	A	0.0857333	0.912323	0.0351304
chr11:7594960:C:T	11:7616191:C:T	C	T	0.23558	0.77168	1.3207e-07
chr11:76557321:T:A	11:76268365:T:A	T	A	0.137088	0.866783	0.000518762
chr11:79391956:C:T	11:79103000:C:T	C	T	0.427135	0.569365	0.0297378
chr11:80613909:T:C	11:80324953:T:C	T	C	0.0624667	0.939412	0.0158817
chr11:80674412:A:G	11:80385456:A:G	A	G	0.944961	0.0570652	0.00706122
chr11:81268610:A:G	11:80979653:A:G	A	G	0.0692488	0.933141	0.00366579
chr11:87501075:T:A	11:87212117:T:A	T	A	0.139903	0.863526	0.0023108
chr11:8880277:G:A	11:8901824:G:A	G	A	0.165334	0.837112	0.0419915
chr11:90184739:T:C	11:89917907:T:C	T	C	0.0554416	0.946269	0.0205165
chr11:92020610:T:C	11:91753776:T:C	T	C	0.251908	0.75181	0.00817988
chr11:92285279:A:G	11:92018445:A:G	A	G	0.659888	0.344884	0.00191379
chr11:98212093:T:A	11:98082821:T:A	T	A	0.399757	0.605892	0.000386991
chr11:99851118:C:A	11:99721850:C:A	C	A	0.182749	0.824713	2.87006e-09
chr12:100716907:T:C	12:101110685:T:C	T	C	0.155803	0.847755	0.00239129
chr12:102575037:T:A	12:102968815:T:A	T	A	0.227197	0.775819	0.0261446
chr12:103657248:G:A	12:104051026:G:A	G	A	0.188152	0.819199	6.60759e-09
chr12:103776696:C:T	12:104170474:C:T	C	T	0.297111	0.711192	2.17469e-08
chr12:106587085:A:G	12:106980863:A:G	A	G	0.0625386	0.939411	0.012447
chr12:106900740:G:A	12:107294518:G:A	G	A	0.0662956	0.93711	2.23485e-05
chr12:107873874:T:C	12:108267651:T:C	T	C	0.672578	0.332509	0.000851004
chr12:109536346:C:T	12:109974151:C:T	C	T	0.174664	0.822195	0.0113561
chr12:109670452:T:C	12:110108257:T:C	T	C	0.199688	0.802923	0.0437855
chr12:113664887:T:C	12:114102692:T:C	T	C	0.477257	0.529971	8.28068e-06
chr12:113792992:T:C	12:114230797:T:C	T	C	0.0928131	0.912384	2.78749e-08
chr12:114227875:G:A	12:114665680:G:A	G	A	0.0970974	0.905842	0.00217393
chr12:114604663:C:T	12:115042468:C:T	C	T	0.204908	0.792218	0.0288042
chr12:114904087:C:T	12:115341892:C:T	C	T	0.283667	0.719668	0.0224771
chr12:115324867:C:A	12:115762672:C:A	C	A	0.061016	0.937425	0.045787
chr12:116368657:C:T	12:116806462:C:T	C	T	0.0819795	0.92033	0.00916096
chr12:11878849:G:A	12:12031783:G:A	G	A	0.0703673	0.933815	4.64476e-07
chr12:118878044:C:T	12:119315849:C:T	C	T	0.0895915	0.908232	0.0203467
chr12:119377324:G:T	12:119815129:G:T	G	T	0.082448	0.915519	0.0247234
chr12:121252752:T:C	12:121690555:T:C	T	C	0.75404	0.254594	1.06892e-09
chr12:122973072:C:T	12:123457619:C:T	C	T	0.685803	0.311117	0.0414537
chr12:123034319:T:C	12:123518866:T:C	T	C	0.774196	0.229644	0.00491977
chr12:123962850:G:T	12:124447397:G:T	G	T	0.302521	0.688224	7.28395e-10
chr12:125208935:G:A	12:125693481:G:A	G	A	0.671927	0.320673	1.22955e-06
chr12:126715987:A:G	12:127200533:A:G	A	G	0.155927	0.846633	0.0293845
chr12:128265434:A:T	12:128749979:A:T	A	T	0.309403	0.69865	8.01296e-08
chr12:129166351:G:T	12:129650896:G:T	G	T	0.633783	0.361617	0.00362187
chr12:129819768:T:C	12:130304313:T:C	T	C	0.0715354	0.931727	7.94077e-05
chr12:12993534:G:A	12:13146468:G:A	G	A	0.0707944	0.930937	0.0374978
chr12:130009774:A:G	12:130494319:A:G	A	G	0.168923	0.834591	0.0037426
chr12:130150318:C:T	12:130634863:C:T	C	T	0.218235	0.778952	0.0368855
chr12:130753191:A:G	12:131237736:A:G	A	G	0.781009	0.222098	0.0222004
chr12:130764008:G:C	12:131248553:G:C	G	C	0.0876196	0.916809	9.76675e-07
chr12:130933691:A:G	12:131418236:A:G	A	G	0.0935682	0.921453	1.96672e-60
chr12:131571765:T:G	12:132056310:T:G	T	G	0.341733	0.669034	2.78904e-12
chr12:131668187:C:G	12:132152732:C:G	C	G	0.0793014	0.939396	1.55248e-111
chr12:131840694:G:A	12:132325239:G:A	G	A	0.468116	0.522084	2.03593e-09
chr12:132445048:G:A	12:133021634:G:A	G	A	0.316887	0.676951	5.00308e-05
chr12:132821865:A:C	12:133398451:A:C	A	C	0.2943	0.716083	2.76132e-12
chr12:14770588:T:C	12:14923522:T:C	T	C	0.592197	0.411349	0.0263305
chr12:1527320:A:G	12:1636486:A:G	A	G	0.113563	0.888873	0.0173041
chr12:16169973:G:A	12:16322907:G:A	G	A	0.158043	0.839559	0.0439729
chr12:1796671:C:T	12:1905837:C:T	C	T	0.0630152	0.935367	0.0430845
chr12:1912534:T:A	12:2021700:T:A	T	A	0.124676	0.873042	0.0344644
chr12:22264141:C:T	12:22417075:C:T	C	T	0.262263	0.732365	0.000197727
chr12:2352057:G:A	12:2461223:G:A	G	A	0.243255	0.750341	5.33601e-06
chr12:23581895:T:A	12:23734829:T:A	T	A	0.116699	0.806289	0
chr12:24928661:C:T	12:25081595:C:T	C	T	0.174956	0.833039	8.7565e-11
chr12:25513983:A:G	12:25666917:A:G	A	G	0.177785	0.826002	0.00215722
chr12:26446832:C:A	12:26599765:C:A	C	A	0.0802771	0.922894	0.000319446
chr12:26865006:C:A	12:27017939:C:A	C	A	0.114752	0.888387	0.00237607
chr12:27811948:G:A	12:27964881:G:A	G	A	0.191387	0.812522	0.00216981
chr12:28361564:G:T	12:28514497:G:T	G	T	0.0690958	0.932722	0.0271495
chr12:2936781:A:C	12:3045947:A:C	A	C	0.167622	0.836025	0.00263038
chr12:29670954:G:C	12:29823887:G:C	G	C	0.549609	0.445271	0.00148825
chr12:30659894:A:C	12:30812828:A:C	A	C	0.225004	0.771428	0.00886058
chr12:30848920:G:A	12:31001854:G:A	G	A	0.153239	0.844112	0.0245539
chr12:30976053:G:A	12:31128988:G:A	G	A	0.261162	0.732415	7.87122e-06
chr12:31875277:A:G	12:32028211:A:G	A	G	0.332984	0.680958	9.29938e-20
chr12:34007252:T:G	12:34160187:T:G	T	G	0.171812	0.832078	0.00141026
chr12:39105039:C:T	12:39498841:C:T	C	T	0.0724269	0.930682	0.000218183
chr12:44420470:G:A	12:44814253:G:A	G	A	0.0690722	0.934117	0.00010313
chr12:46843681:C:A	12:47237464:C:A	C	A	0.624704	0.372039	0.0379067
chr12:47858881:G:A	12:48252664:G:A	G	A	0.488911	0.506866	0.00921525
chr12:51394035:C:T	12:51787819:C:T	C	T	0.607059	0.386789	0.000101985
chr12:51614768:T:G	12:52008552:T:G	T	G	0.0944126	0.908797	0.000698163
chr12:52818740:G:A	12:53212524:G:A	G	A	0.0551697	0.947127	0.00190977
chr12:52882649:G:T	12:53276433:G:T	G	T	0.129148	0.877313	3.7096e-09
chr12:53486869:C:T	12:53880653:C:T	C	T	0.0829655	0.913891	0.000552874
chr12:53679285:G:T	12:54073069:G:T	G	T	0.317362	0.689882	1.61599e-06
chr12:54573955:G:A	12:54967739:G:A	G	A	0.325504	0.678011	0.0206087
chr12:55275204:T:G	12:55668988:T:G	T	G	0.0549312	0.943113	0.00913815
chr12:5625153:A:G	12:5734319:A:G	A	G	0.652269	0.34411	0.01864
chr12:5930157:C:T	12:6039323:C:T	C	T	0.0895519	0.917002	7.215e-13
chr12:62609625:C:A	12:63003405:C:A	C	A	0.103446	0.901239	2.08561e-06
chr12:63684020:A:G	12:64077800:A:G	A	G	0.301033	0.702793	0.0100672
chr12:63745000:C:G	12:64138780:C:G	C	G	0.456464	0.550952	4.61497e-06
chr12:66262787:A:G	12:66656567:A:G	A	G	0.0869485	0.916376	0.000244208
chr12:6721719:G:A	12:6830885:G:A	G	A	0.239984	0.771914	1.11364e-17
chr12:68946589:G:A	12:69340369:G:A	G	A	0.160444	0.834585	4.01147e-05
chr12:68960853:C:T	12:69354633:C:T	C	T	0.369152	0.622829	3.77685e-07
chr12:70689003:A:G	12:71082783:A:G	A	G	0.071456	0.9382	7.90428e-32
chr12:71126157:A:G	12:71519937:A:G	A	G	0.831926	0.170894	0.0208461
chr12:7230985:C:T	12:7383581:C:T	C	T	0.250904	0.758934	2.78513e-12
chr12:74874102:G:T	12:75267882:G:T	G	T	0.0843127	0.917582	0.0347934
chr12:75818136:C:T	12:76211916:C:T	C	T	0.182027	0.812293	7.40152e-06
chr12:76719504:C:T	12:77113284:C:T	C	T	0.252119	0.744092	0.00744893
chr12:77197569:G:T	12:77591349:G:T	G	T	0.121502	0.883168	1.02652e-05
chr12:7729399:A:C	12:7881995:A:C	A	C	0.151789	0.851478	0.00497477
chr12:80768922:A:C	12:81162701:A:C	A	C	0.882918	0.112469	8.16613e-06
chr12:82662255:C:A	12:83056034:C:A	C	A	0.240903	0.741147	8.88891e-37
chr12:82712498:T:C	12:83106277:T:C	T	C	0.110792	0.894361	4.08201e-07
chr12:84698547:T:G	12:85092326:T:G	T	G	0.0613394	0.94297	1.81154e-08
chr12:9338335:T:A	12:9490931:T:A	T	A	0.0938323	0.892941	5.7749e-42
chr12:93747996:T:A	12:94141772:T:A	T	A	0.496923	0.498683	0.00676993
chr12:94443155:T:C	12:94836931:T:C	T	C	0.082073	0.921543	4.80681e-05
chr12:94443281:T:G	12:94837057:T:G	T	G	0.070756	0.931389	0.00988589
chr12:94486741:A:T	12:94880517:A:T	A	T	0.067294	0.928638	8.99847e-07
chr12:95004664:G:A	12:95398440:G:A	G	A	0.187205	0.819678	5.32033e-08
chr12:96978082:T:A	12:97371860:T:A	T	A	0.350413	0.662992	5.64933e-18
chr12:9700065:A:C	12:9852661:A:C	A	C	0.0595441	0.943768	1.21004e-05
chr12:97194239:C:T	12:97588017:C:T	C	T	0.131051	0.871457	0.0217792
chr12:99798737:T:C	12:100192515:T:C	T	C	0.489811	0.524333	4.808e-18
chr13:100872137:G:A	13:101524391:G:A	G	A	0.408068	0.587181	0.00301439
chr13:100984370:A:T	13:101636722:A:T	A	T	0.105112	0.899941	3.66839e-07
chr13:103621666:G:A	13:104274016:G:A	G	A	0.104532	0.898172	0.00634183
chr13:103855459:T:C	13:104507809:T:C	T	C	0.053733	0.948503	0.001995
chr13:104265282:G:A	13:104917632:G:A	G	A	0.629481	0.366661	0.0136275
chr13:104591572:T:C	13:105243923:T:C	T	C	0.853324	0.140721	1.5479e-07
chr13:106395768:A:C	13:107048116:A:C	A	C	0.852823	0.142571	5.6917e-05
chr13:108358525:T:C	13:109010873:T:C	T	C	0.0972267	0.904855	0.0296484
chr13:108506532:T:A	13:109158880:T:A	T	A	0.135305	0.869944	2.18599e-06
chr13:109226751:A:G	13:109879099:A:G	A	G	0.236998	0.768503	7.15548e-05
chr13:110485559:G:A	13:111137906:G:A	G	A	0.415744	0.587431	0.0469466
chr13:110503364:C:T	13:111155711:C:T	C	T	0.363395	0.633283	0.0338254
chr13:112911129:G:A	13:113565443:G:A	G	A	0.0899438	0.907566	0.00831284
chr13:113003553:T:C	13:113657867:T:C	T	C	0.553571	0.449768	0.0385637
chr13:114080168:A:G	13:114845643:A:G	A	G	0.0798272	0.922271	0.0162027
chr13:114110954:C:T	13:114876429:C:T	C	T	0.16081	0.836464	0.0229838
chr13:19148352:G:C	13:19722492:G:C	G	C	0.0868578	0.915335	0.0156276
chr13:20235982:C:A	13:20810121:C:A	C	A	0.125071	0.85329	7.13526e-83
chr13:22201823:T:A	13:22775962:T:A	T	A	0.070721	0.931393	0.0110231
chr13:22981550:C:T	13:23555689:C:T	C	T	0.0652239	0.937676	0.000274218
chr13:23559694:A:G	13:24133833:A:G	A	G	0.0813804	0.922543	9.47755e-06
chr13:23989756:T:C	13:24563895:T:C	T	C	0.908945	0.0929907	0.0397029
chr13:24380338:T:C	13:24954476:T:C	T	C	0.0568632	0.947583	1.66609e-09
chr13:24498739:T:C	13:25072877:T:C	T	C	0.100312	0.903451	0.000110934
chr13:24500352:C:T	13:25074490:C:T	C	T	0.096662	0.900688	0.00642757
chr13:26780458:T:G	13:27354595:T:G	T	G	0.100416	0.901801	0.0222299
chr13:27517320:G:A	13:28091457:G:A	G	A	0.130085	0.866103	0.00058009
chr13:27675093:G:A	13:28249230:G:A	G	A	0.149748	0.846737	0.00270586
chr13:27801589:T:C	13:28375726:T:C	T	C	0.284057	0.711294	0.00153294
chr13:29229974:C:T	13:29804111:C:T	C	T	0.817827	0.176654	9.83354e-06
chr13:29235804:A:G	13:29809941:A:G	A	G	0.5737	0.421014	0.000969943
chr13:30541201:C:T	13:31115338:C:T	C	T	0.156669	0.840091	0.00630566
chr13:30935521:C:T	13:31509658:C:T	C	T	0.0558235	0.947388	1.22225e-05
chr13:32181697:C:T	13:32755834:C:T	C	T	0.506452	0.497871	0.00771218
chr13:34083189:C:A	13:34657326:C:A	C	A	0.0677776	0.934637	0.00291018
chr13:34678153:A:C	13:35252290:A:C	A	C	0.290811	0.712729	0.0159994
chr13:35673845:T:C	13:36247982:T:C	T	C	0.0962153	0.907712	3.92387e-05
chr13:36355849:C:A	13:36929986:C:A	C	A	0.254428	0.748929	0.0175145
chr13:38802663:A:G	13:39376800:A:G	A	G	0.715387	0.287809	0.0301757
chr13:39313192:G:A	13:39887329:G:A	G	A	0.68293	0.313402	0.0155772
chr13:40263157:A:G	13:40837294:A:G	A	G	0.211365	0.794756	3.62762e-06
chr13:42373291:T:G	13:42947427:T:G	T	G	0.776807	0.21899	0.00181923
chr13:43806541:G:A	13:44380677:G:A	G	A	0.204102	0.798787	0.0269337
chr13:43966560:G:A	13:44540696:G:A	G	A	0.295524	0.707769	0.0272702
chr13:44687808:T:C	13:45261944:T:C	T	C	0.0719397	0.926149	0.0246338
chr13:45921890:G:C	13:46496025:G:C	G	C	0.0568744	0.945317	0.00351648
chr13:46344957:A:T	13:46919092:A:T	A	T	0.280044	0.729723	2.10728e-11
chr13:46431208:C:T	13:47005343:C:T	C	T	0.0558891	0.942436	0.0264791
chr13:49126269:T:G	13:49700405:T:G	T	G	0.37235	0.618976	5.22343e-08
chr13:52300895:A:G	13:52875030:A:G	A	G	0.705608	0.290966	0.0205596
chr13:53081439:G:A	13:53655574:G:A	G	A	0.167871	0.829449	0.0278
chr13:53930931:C:T	13:54505066:C:T	C	T	0.13354	0.870964	4.4016e-05
chr13:55313878:G:T	13:55888013:G:T	G	T	0.297554	0.717193	3.59813e-23
chr13:55751157:C:T	13:56325291:C:T	C	T	0.294486	0.714928	2.35902e-10
chr13:57626855:A:G	13:58200989:A:G	A	G	0.141441	0.864534	1.23168e-07
chr13:61102370:G:A	13:61676504:G:A	G	A	0.0818207	0.914862	0.000232937
chr13:62638049:T:A	13:63212182:T:A	T	A	0.11805	0.885615	0.000468133
chr13:67442088:A:C	13:68016220:A:C	A	C	0.0664882	0.919845	9.4166e-58
chr13:67763117:C:T	13:68337249:C:T	C	T	0.080483	0.921575	0.0198362
chr13:69714729:G:A	13:70288861:G:A	G	A	0.326119	0.669669	0.00596884
chr13:69745301:C:A	13:70319433:C:A	C	A	0.235661	0.770002	3.90325e-05
chr13:70658792:A:G	13:71232924:A:G	A	G	0.0871062	0.915315	0.00766091
chr13:70721051:A:G	13:71295183:A:G	A	G	0.0760056	0.92716	0.000206942
chr13:72435662:A:T	13:73009800:A:T	A	T	0.580405	0.412637	1.34976e-05
chr13:75402181:C:A	13:75976317:C:A	C	A	0.100936	0.896742	0.0189654
chr13:76707711:G:C	13:77281846:G:C	G	C	0.0883257	0.917631	5.1554e-11
chr13:76761824:C:A	13:77335959:C:A	C	A	0.241115	0.774731	1.26574e-29
chr13:77626961:C:A	13:78201096:C:A	C	A	0.923979	0.0706319	1.69762e-10
chr13:78210898:C:T	13:78785033:C:T	C	T	0.0986935	0.904525	0.000861286
chr13:78640977:T:C	13:79215112:T:C	T	C	0.242394	0.760724	0.0246819
chr13:81280803:A:G	13:81854938:A:G	A	G	0.186766	0.822957	1.70958e-14
chr13:81493233:C:A	13:82067368:C:A	C	A	0.278711	0.714145	1.11765e-06
chr13:82569465:G:T	13:83143600:G:T	G	T	0.497385	0.49876	0.0177204
chr13:84662456:T:A	13:85236591:T:A	T	A	0.147966	0.854701	0.0201625
chr13:84711539:A:G	13:85285674:A:G	A	G	0.47584	0.527619	0.0327491
chr13:85264104:C:T	13:85838239:C:T	C	T	0.0506334	0.947198	0.00269849
chr13:85267217:G:T	13:85841352:G:T	G	T	0.0929609	0.910108	0.00102734
chr13:87252036:T:G	13:87904291:T:G	T	G	0.0516664	0.945359	4.65957e-05
chr13:90116634:C:T	13:90768888:C:T	C	T	0.19318	0.809369	0.0461172
chr13:91783803:T:C	13:92436057:T:C	T	C	0.73894	0.264367	0.0206423
chr13:97913640:G:C	13:98565894:G:C	G	C	0.0671859	0.936645	1.87987e-06
chr14:102922662:T:C	14:103388999:T:C	T	C	0.48146	0.522077	0.0295393
chr14:103431976:T:C	14:103898313:T:C	T	C	0.317589	0.668101	1.06883e-20
chr14:104210592:G:A	14:104676929:G:A	G	A	0.384432	0.611288	0.00681911
chr14:104314074:C:A	14:104780411:C:A	C	A	0.224998	0.780497	4.92467e-05
chr14:104687768:A:G	14:105154105:A:G	A	G	0.503992	0.501165	0.00152034
chr14:104796444:C:T	14:105262781:C:T	C	T	0.278035	0.71573	2.28457e-05
chr14:105263455:G:A	14:105729792:G:A	G	A	0.275553	0.721238	0.0272884
chr14:106821535:C:T	14:107229765:C:T	C	T	0.0876774	0.914702	0.00941316
chr14:106844924:C:T	14:107253139:C:T	C	T	0.224907	0.770094	0.000252268
chr14:19952179:T:C	14:20420338:T:C	T	C	0.138533	0.869725	1.02031e-13
chr14:20477992:T:C	14:20946151:T:C	T	C	0.284275	0.719106	0.020733
chr14:20604158:C:G	14:21072317:C:G	C	G	0.172966	0.822964	0.000959746
chr14:21103948:G:T	14:21572107:G:T	G	T	0.073183	0.92942	0.00204965
chr14:22662732:G:A	14:23131941:G:A	G	A	0.0736632	0.923896	0.00455687
chr14:23130762:G:T	14:23599971:G:T	G	T	0.0847435	0.91078	9.82793e-07
chr14:23667945:C:T	14:24137154:C:T	C	T	0.75193	0.245146	0.036888
chr14:24232499:G:C	14:24701705:G:C	G	C	0.120725	0.882853	0.000702126
chr14:24632191:A:G	14:25101397:A:G	A	G	0.113236	0.888874	0.0391802
chr14:26199479:G:A	14:26668685:G:A	G	A	0.415888	0.577725	6.65485e-05
chr14:27248019:T:G	14:27717225:T:G	T	G	0.0641895	0.937531	0.0303726
chr14:27657830:G:C	14:28127036:G:C	G	C	0.502641	0.500664	0.0420651
chr14:29230205:T:C	14:29699411:T:C	T	C	0.30687	0.69775	0.00201039
chr14:30160704:C:G	14:30629910:C:G	C	G	0.0521256	0.94633	0.0349587
chr14:31923795:G:A	14:32393001:G:A	G	A	0.68931	0.314436	0.012677
chr14:32778826:C:A	14:33248032:C:A	C	A	0.102368	0.900365	0.00523749
chr14:32794645:T:C	14:33263851:T:C	T	C	0.474998	0.52838	0.0370592
chr14:33582927:T:C	14:34052133:T:C	T	C	0.255099	0.752977	1.13735e-08
chr14:34086169:A:G	14:34555375:A:G	A	G	0.135141	0.869974	3.82054e-06
chr14:35155625:A:C	14:35624831:A:C	A	C	0.186368	0.816578	0.0196058
chr14:35583084:G:A	14:36052290:G:A	G	A	0.132621	0.874721	1.27642e-11
chr14:41034665:C:T	14:41503870:C:T	C	T	0.416465	0.587479	0.0135912
chr14:43383310:T:C	14:43852513:T:C	T	C	0.0883934	0.914783	0.000525384
chr14:46703356:G:T	14:47172559:G:T	G	T	0.242739	0.752773	0.00136981
chr14:50026527:C:A	14:50493245:C:A	C	A	0.0788369	0.923271	0.0158115
chr14:50111193:A:G	14:50577911:A:G	A	G	0.864895	0.138617	0.00175566
chr14:50197684:A:T	14:50664402:A:T	A	T	0.874166	0.128339	0.0203547
chr14:51549565:A:G	14:52016283:A:G	A	G	0.205964	0.80181	3.0925e-09
chr14:51945780:G:A	14:52412498:G:A	G	A	0.364764	0.644256	7.92388e-09
chr14:53146939:T:G	14:53613657:T:G	T	G	0.865123	0.117617	1.46914e-57
chr14:54353864:A:C	14:54820582:A:C	A	C	0.173136	0.833884	1.04787e-08
chr14:56453988:G:T	14:56920706:G:T	G	T	0.0557874	0.945691	0.0453779
chr14:56749211:A:G	14:57215929:A:G	A	G	0.130055	0.874238	8.22354e-05
chr14:56761566:A:C	14:57228284:A:C	A	C	0.865877	0.127656	3.15106e-09
chr14:58079392:C:A	14:58546110:C:A	C	A	0.429162	0.561684	1.41907e-08
chr14:60705382:A:G	14:61172100:A:G	A	G	0.705527	0.297831	0.0234349
chr14:61262775:A:G	14:61729493:A:G	A	G	0.0557776	0.941476	0.000309628
chr14:63245295:A:C	14:63712013:A:C	A	C	0.0946266	0.908372	0.00155438
chr14:63791955:C:A	14:64258673:C:A	C	A	0.667213	0.329466	0.0305325
chr14:64270791:T:C	14:64737509:T:C	T	C	0.0694065	0.933544	0.000305678
chr14:65698068:G:A	14:66164786:G:A	G	A	0.0668567	0.938633	6.59245e-12
chr14:67444770:G:T	14:67911487:G:T	G	T	0.37528	0.630789	0.00011124
chr14:67677474:A:G	14:68144191:A:G	A	G	0.174308	0.831131	9.70395e-06
chr14:68610910:G:A	14:69077627:G:A	G	A	0.0618144	0.940174	0.0109245
chr14:69830872:T:A	14:70297589:T:A	T	A	0.23113	0.719261	1.14786e-269
chr14:72046041:C:G	14:72512758:C:G	C	G	0.667212	0.337789	0.00114749
chr14:72220238:G:A	14:72686946:G:A	G	A	0.399575	0.594975	0.000646931
chr14:73737639:T:C	14:74204342:T:C	T	C	0.0862866	0.91602	0.0111492
chr14:75903428:A:G	14:76369771:A:G	A	G	0.0573052	0.945714	5.04885e-05
chr14:76258299:G:C	14:76724642:G:C	G	C	0.0691996	0.933172	0.00361661
chr14:76663727:A:G	14:77130070:A:G	A	G	0.145314	0.857062	0.0375648
chr14:76742627:C:A	14:77208970:C:A	C	A	0.0994206	0.902633	0.0345266
chr14:76825750:T:C	14:77292093:T:C	T	C	0.275363	0.733882	1.80348e-10
chr14:77564838:A:G	14:78031181:A:G	A	G	0.0912732	0.910604	0.0440799
chr14:77797490:G:T	14:78263833:G:T	G	T	0.840607	0.152987	5.00734e-08
chr14:78681869:G:T	14:79148212:G:T	G	T	0.100395	0.897453	0.0276696
chr14:80674114:A:G	14:81140458:A:G	A	G	0.860819	0.141842	0.0188028
chr14:80820048:T:G	14:81286392:T:G	T	G	0.0546731	0.947284	0.00738329
chr14:81004795:A:C	14:81471139:A:C	A	C	0.350265	0.653254	0.0228631
chr14:81588112:A:G	14:82054456:A:G	A	G	0.0995393	0.903455	0.00189587
chr14:84227019:C:A	14:84693363:C:A	C	A	0.642834	0.353964	0.0390899
chr14:84682681:C:T	14:85149025:C:T	C	T	0.640856	0.355989	0.0431242
chr14:87511107:G:T	14:87977451:G:T	G	T	0.0735231	0.928562	0.0132704
chr14:91737429:C:T	14:92203773:C:T	C	T	0.090278	0.906102	0.000130191
chr14:92922159:G:T	14:93388504:G:T	G	T	0.771539	0.221878	1.18785e-06
chr14:93824462:G:T	14:94290808:G:T	G	T	0.189198	0.807229	0.00523196
chr14:94042298:C:T	14:94508644:C:T	C	T	0.354424	0.641013	0.00338599
chr14:94628067:T:C	14:95094404:T:C	T	C	0.110221	0.89211	0.0210464
chr14:94884183:G:A	14:95350520:G:A	G	A	0.0541457	0.949837	3.38863e-08
chr14:95874581:T:C	14:96340918:T:C	T	C	0.358069	0.632343	9.03182e-10
chr14:95939285:G:A	14:96405622:G:A	G	A	0.741007	0.263632	0.00111792
chr14:96472323:G:A	14:96938660:G:A	G	A	0.458869	0.536826	0.00802822
chr14:96860761:T:TTG	14:97327098:T:TTG	T	TTG	0.0654178	0.937568	0.000168921
chr14:98205431:C:T	14:98671768:C:T	C	T	0.0513786	0.944574	2.84761e-08
chr14:99683165:C:A	14:100149502:C:A	C	A	0.40024	0.588493	2.32701e-12
chr14:99953050:G:T	14:100419387:G:T	G	T	0.280722	0.707634	2.69773e-15
chr15:100349725:C:G	15:100889930:C:G	C	G	0.0842019	0.917836	0.0228442
chr15:101162696:A:G	15:101702901:A:G	A	G	0.611606	0.394077	0.000372826
chr15:101378898:T:C	15:101919103:T:C	T	C	0.945291	0.0571774	0.00103224
chr15:101477847:G:T	15:102018052:G:T	G	T	0.282901	0.720233	0.0312143
chr15:19969608:C:T	15:20174861:C:T	C	T	0.215171	0.787954	0.0188178
chr15:23067245:T:G	15:22805823:T:G	T	G	0.101833	0.900744	0.00819299
chr15:24540281:G:A	15:24785428:G:A	G	A	0.421169	0.57279	0.000166462
chr15:24924297:A:G	15:25169444:A:G	A	G	0.448232	0.5571	0.00094042
chr15:25778508:C:A	15:26023655:C:A	C	A	0.152115	0.851492	0.0019309
chr15:26375733:A:C	15:26620880:A:C	A	C	0.0822593	0.921161	0.000106707
chr15:26667001:G:C	15:26912148:G:C	G	C	0.296065	0.701022	0.0497058
chr15:26816265:T:C	15:27061412:T:C	T	C	0.0890578	0.913907	0.00127295
chr15:27410837:C:T	15:27655983:C:T	C	T	0.0612102	0.941267	0.0015011
chr15:29439240:G:A	15:29731444:G:A	G	A	0.169189	0.837387	6.46237e-08
chr15:30995696:G:A	15:31287899:G:A	G	A	0.198588	0.804399	0.0228648
chr15:31711888:A:G	15:32004091:A:G	A	G	0.236195	0.76865	0.00042534
chr15:33051481:G:A	15:33343682:G:A	G	A	0.431592	0.578026	2.44431e-09
chr15:33812020:T:G	15:34104221:T:G	T	G	0.269077	0.734063	0.0283733
chr15:35950968:T:C	15:36243169:T:C	T	C	0.727543	0.266119	1.01005e-05
chr15:36386510:C:T	15:36678711:C:T	C	T	0.222477	0.774661	0.0346428
chr15:36734411:A:T	15:37026612:A:T	A	T	0.275978	0.73681	1.38031e-18
chr15:37330528:C:A	15:37622729:C:A	C	A	0.0877879	0.914964	0.00251725
chr15:38754011:G:T	15:39046212:G:T	G	T	0.661633	0.333409	0.00120159
chr15:38868230:C:A	15:39160431:C:A	C	A	0.181872	0.813749	0.000527246
chr15:38886316:A:T	15:39178517:A:T	A	T	0.577155	0.426077	0.0446566
chr15:41481543:G:T	15:41773741:G:T	G	T	0.0529721	0.944438	0.0004811
chr15:45710326:G:T	15:46002524:G:T	G	T	0.0776016	0.925666	0.000162338
chr15:48936418:A:G	15:49228615:A:G	A	G	0.19215	0.811712	0.00246334
chr15:50679342:C:A	15:50971539:C:A	C	A	0.541019	0.450755	4.03069e-07
chr15:52957840:G:A	15:53250037:G:A	G	A	0.424303	0.571691	0.0124848
chr15:54167533:A:G	15:54459730:A:G	A	G	0.287401	0.72351	1.15877e-13
chr15:54241689:G:A	15:54533887:G:A	G	A	0.298102	0.697931	0.00777546
chr15:58474532:A:G	15:58766731:A:G	A	G	0.709965	0.292985	0.0452339
chr15:58713575:A:G	15:59005774:A:G	A	G	0.080704	0.921699	0.00610968
chr15:59161379:G:A	15:59453578:G:A	G	A	0.104278	0.893395	0.0204664
chr15:59591899:G:A	15:59884098:G:A	G	A	0.222859	0.773854	0.0153207
chr15:60082666:C:T	15:60374865:C:T	C	T	0.898886	0.103078	0.04564
chr15:61024227:A:G	15:61316426:A:G	A	G	0.0889486	0.913725	0.00373397
chr15:62529095:T:C	15:62821294:T:C	T	C	0.109	0.882572	4.56539e-16
chr15:67133926:T:G	15:67426264:T:G	T	G	0.0576456	0.945568	1.66648e-05
chr15:70177895:TG:T	15:70470234:TG:T	TG	T	0.231447	0.497	0
chr15:73558413:G:A	15:73850754:G:A	G	A	0.50975	0.493498	0.0445585
chr15:75750009:C:A	15:76042350:C:A	C	A	0.272625	0.722552	0.00094213
chr15:77013796:T:C	15:77306137:T:C	T	C	0.122946	0.879731	0.0116206
chr15:77970102:G:A	15:78262444:G:A	G	A	0.207564	0.789204	0.0145941
chr15:78140893:T:C	15:78433235:T:C	T	C	0.924014	0.0780095	0.019965
chr15:78206605:G:A	15:78498947:G:A	G	A	0.121481	0.876278	0.0363929
chr15:78849442:T:C	15:79141784:T:C	T	C	0.468207	0.535634	0.0176858
chr15:79126716:T:C	15:79419058:T:C	T	C	0.0655149	0.936319	0.0215287
chr15:79332068:C:G	15:79624410:C:G	C	G	0.189572	0.814272	0.00246657
chr15:79742451:T:C	15:80034793:T:C	T	C	0.315218	0.695578	7.52579e-13
chr15:80774190:A:G	15:81066531:A:G	A	G	0.943408	0.0593335	0.000336738
chr15:82094379:A:C	15:82386720:A:C	A	C	0.0961933	0.901134	0.00578503
chr15:84145975:A:G	15:84814727:A:G	A	G	0.0713979	0.930771	0.00890254
chr15:84860109:C:T	15:85403340:C:T	C	T	0.0721369	0.925549	0.0065718
chr15:86950520:T:A	15:87493751:T:A	T	A	0.717103	0.239702	3.12356e-202
chr15:87517135:A:T	15:88060366:A:T	A	T	0.27783	0.728543	1.16477e-05
chr15:89699652:C:T	15:90242883:C:T	C	T	0.0607615	0.94339	5.66513e-08
chr15:89831025:C:A	15:90374257:C:A	C	A	0.730873	0.272579	0.0169581
chr15:90240825:T:A	15:90784057:T:A	T	A	0.129671	0.866588	0.000683893
chr15:91527489:C:A	15:92070719:C:A	C	A	0.397653	0.599153	0.0446359
chr15:93243825:G:A	15:93787054:G:A	G	A	0.0941662	0.909406	0.000163479
chr15:93356654:C:T	15:93899883:C:T	C	T	0.206896	0.803292	9.30892e-15
chr15:93562164:T:C	15:94105393:T:C	T	C	0.27372	0.722292	0.00643708
chr15:94146424:G:A	15:94689653:G:A	G	A	0.607547	0.386932	0.000512968
chr15:95085578:C:T	15:95628807:C:T	C	T	0.16283	0.84048	0.00630032
chr15:95185916:G:A	15:95729145:G:A	G	A	0.102074	0.902084	1.82031e-05
chr15:95552961:A:G	15:96096190:A:G	A	G	0.334703	0.672613	1.77177e-06
chr15:96957080:G:T	15:97500310:G:T	G	T	0.497929	0.505717	0.0241684
chr15:97253603:A:G	15:97796833:A:G	A	G	0.140871	0.863175	0.000330216
chr15:97522473:G:A	15:98065703:G:A	G	A	0.183248	0.813959	0.0272803
chr15:98090563:C:A	15:98633792:C:A	C	A	0.0743705	0.929124	3.28854e-05
chr15:98382453:G:A	15:98925682:G:A	G	A	0.395554	0.598609	0.000247873
chr15:99266942:A:G	15:99807147:A:G	A	G	0.629194	0.37488	0.00942192
chr15:99906812:C:T	15:100447017:C:T	C	T	0.0533872	0.949806	9.11184e-06
chr15:99973159:G:A	15:100513364:G:A	G	A	0.626343	0.36856	0.00119959
chr16:1009706:G:A	16:1059706:G:A	G	A	0.0882839	0.909198	0.00695308
chr16:1025147:G:A	16:1075147:G:A	G	A	0.0842661	0.918274	0.00472139
chr16:10256769:A:G	16:10350626:A:G	A	G	0.328832	0.684399	6.25191e-18
chr16:10330860:G:A	16:10424717:G:A	G	A	0.331814	0.664949	0.0347201
chr16:11202115:G:A	16:11295972:G:A	G	A	0.877871	0.119113	0.00434
chr16:11495228:G:C	16:11589084:G:C	G	C	0.0815676	0.921113	0.00252461
chr16:11565399:T:G	16:11659255:T:G	T	G	0.195689	0.809886	1.45523e-05
chr16:1215720:C:T	16:1265720:C:T	C	T	0.841374	0.156222	0.0422176
chr16:13265831:C:A	16:13359688:C:A	C	A	0.0846109	0.91784	0.00659554
chr16:13368751:A:C	16:13462608:A:C	A	C	0.79991	0.195053	0.000101459
chr16:13656002:T:C	16:13749859:T:C	T	C	0.789652	0.213638	0.0130034
chr16:1443150:C:T	16:1493151:C:T	C	T	0.349673	0.641624	2.69337e-08
chr16:16142574:G:A	16:16236431:G:A	G	A	0.0544897	0.947123	0.0284539
chr16:1808887:G:A	16:1858888:G:A	G	A	0.771594	0.221723	9.17142e-07
chr16:1866102:C:T	16:1916103:C:T	C	T	0.838128	0.157669	0.00041202
chr16:1886181:T:G	16:1936182:T:G	T	G	0.0674921	0.935468	0.000249888
chr16:19150137:A:G	16:19161459:A:G	A	G	0.265308	0.729253	0.000159074
chr16:23303530:A:C	16:23314851:A:C	A	C	0.209867	0.794442	0.00107737
chr16:24606964:T:C	16:24618285:T:C	T	C	0.288607	0.71681	0.000227581
chr16:24609812:C:T	16:24621133:C:T	C	T	0.261685	0.73185	7.3144e-06
chr16:25883143:C:G	16:25894464:C:G	C	G	0.73509	0.268059	0.02802
chr16:26793187:T:C	16:26804508:T:C	T	C	0.670509	0.334178	0.00221824
chr16:27138436:C:T	16:27149757:C:T	C	T	0.127979	0.877413	6.412e-07
chr16:27172943:T:A	16:27184264:T:A	T	A	0.265493	0.739916	0.000160795
chr16:27405797:T:C	16:27417118:T:C	T	C	0.289539	0.713646	0.0302402
chr16:27855743:G:A	16:27867064:G:A	G	A	0.100452	0.903695	2.12138e-05
chr16:2817449:G:C	16:2867450:G:C	G	C	0.526217	0.479883	0.000169281
chr16:28269597:G:A	16:28280918:G:A	G	A	0.0536263	0.948592	0.00258853
chr16:3103405:G:A	16:3153406:G:A	G	A	0.78336	0.213852	0.0359689
chr16:31486560:G:A	16:31497881:G:A	G	A	0.144972	0.852527	0.0303262
chr16:34061841:G:A	16:33864308:G:A	G	A	0.0928993	0.923375	1.36278e-71
chr16:49870885:T:G	16:49904796:T:G	T	G	0.0925641	0.909941	0.00730845
chr16:49962389:G:A	16:49996300:G:A	G	A	0.226615	0.768702	0.000627257
chr16:5228910:G:A	16:5278911:G:A	G	A	0.703774	0.299234	0.0424151
chr16:53326361:G:T	16:53360273:G:T	G	T	0.109565	0.888296	0.036139
chr16:534038:T:G	16:584038:T:G	T	G	0.159391	0.843601	0.011404
chr16:54570957:G:T	16:54604869:G:T	G	T	0.392651	0.61055	0.045306
chr16:55420354:C:A	16:55454266:C:A	C	A	0.31384	0.691001	0.00129254
chr16:55830540:C:A	16:55864452:C:A	C	A	0.0539148	0.943859	0.00281035
chr16:5600507:A:G	16:5650508:A:G	A	G	0.179573	0.825329	8.0728e-05
chr16:56277862:G:A	16:56311774:G:A	G	A	0.305513	0.700134	0.000157324
chr16:57765387:G:A	16:57799299:G:A	G	A	0.0708741	0.925903	0.000147193
chr16:58884402:G:A	16:58918306:G:A	G	A	0.283824	0.712893	0.0258074
chr16:59090727:T:C	16:59124631:T:C	T	C	0.116174	0.886455	0.0110642
chr16:63179354:T:C	16:63213258:T:C	T	C	0.266025	0.743481	3.55781e-11
chr16:6497540:T:C	16:6547541:T:C	T	C	0.514765	0.489246	0.0133818
chr16:66267821:G:A	16:66301724:G:A	G	A	0.10578	0.889945	2.51928e-05
chr16:67991092:G:A	16:68024995:G:A	G	A	0.167144	0.830075	0.0227444
chr16:68047438:A:G	16:68081341:A:G	A	G	0.12344	0.879761	0.0025856
chr16:68050691:A:G	16:68084594:A:G	A	G	0.123588	0.883441	3.14209e-11
chr16:68820800:G:C	16:68854703:G:C	G	C	0.0821233	0.920574	0.00242712
chr16:68911416:T:C	16:68945319:T:C	T	C	0.0862647	0.918164	1.33036e-06
chr16:70737563:C:T	16:70771466:C:T	C	T	0.0784516	0.925194	2.60037e-05
chr16:73160783:T:C	16:73194682:T:C	T	C	0.142656	0.854608	0.0162301
chr16:73245781:G:A	16:73279680:G:A	G	A	0.0999623	0.896908	0.00151864
chr16:73401366:A:C	16:73435265:A:C	A	C	0.30669	0.703408	1.69723e-11
chr16:73402882:C:G	16:73436781:C:G	C	G	0.0930148	0.909824	0.00257545
chr16:77946173:C:A	16:77980070:C:A	C	A	0.439149	0.5691	3.05902e-07
chr16:78108411:G:T	16:78142308:G:T	G	T	0.336635	0.65578	8.34776e-07
chr16:78262173:C:A	16:78296070:C:A	C	A	0.142724	0.862264	1.08049e-05
chr16:78557656:A:G	16:78591553:A:G	A	G	0.156233	0.850546	8.45704e-09
chr16:78827459:A:C	16:78861356:A:C	A	C	0.230494	0.772325	0.0395123
chr16:78831084:G:C	16:78864981:G:C	G	C	0.0646582	0.93302	0.00420197
chr16:78831104:T:G	16:78865001:T:G	T	G	0.0614997	0.940164	0.0315862
chr16:7917108:C:T	16:7967110:C:T	C	T	0.216796	0.778712	0.000849047
chr16:79598568:G:A	16:79632465:G:A	G	A	0.266114	0.740305	7.5667e-06
chr16:80744061:C:G	16:80777958:C:G	C	G	0.327264	0.666788	0.000101585
chr16:81210220:C:T	16:81243825:C:T	C	T	0.658171	0.335688	6.86622e-05
chr16:81246869:G:A	16:81280474:G:A	G	A	0.386016	0.621959	5.53648e-07
chr16:81547052:G:A	16:81580657:G:A	G	A	0.11016	0.893384	0.000440259
chr16:81713997:A:G	16:81747602:A:G	A	G	0.779377	0.224731	0.00230722
chr16:82961492:A:G	16:82995097:A:G	A	G	0.171821	0.836149	7.3076e-11
chr16:83763416:T:A	16:83797021:T:A	T	A	0.750966	0.251845	0.0451911
chr16:84116773:A:G	16:84150378:A:G	A	G	0.397443	0.606149	0.0238052
chr16:84409854:C:T	16:84443460:C:T	C	T	0.926456	0.0709693	0.00217656
chr16:84866239:G:T	16:84899845:G:T	G	T	0.650466	0.357408	4.421e-07
chr16:85222343:A:G	16:85255949:A:G	A	G	0.504681	0.498743	0.0351472
chr16:86318030:C:T	16:86351636:C:T	C	T	0.236202	0.774639	3.82725e-15
chr16:86450497:G:A	16:86484103:G:A	G	A	0.146803	0.848505	5.74407e-05
chr16:87018092:G:A	16:87051698:G:A	G	A	0.194724	0.809252	0.00196098
chr16:87635006:T:C	16:87668612:T:C	T	C	0.313213	0.69089	0.00628105
chr16:87642185:C:G	16:87675791:C:G	C	G	0.38966	0.61431	0.0120906
chr16:87679308:G:C	16:87712914:G:C	G	C	0.112137	0.892015	4.97564e-05
chr16:8788980:C:T	16:8882837:C:T	C	T	0.138072	0.859402	0.0251452
chr16:87932808:C:G	16:87966414:C:G	C	G	0.204761	0.799162	0.00266445
chr16:88439227:A:G	16:88505635:A:G	A	G	0.787967	0.217426	5.7176e-05
chr17:10171031:C:T	17:10074348:C:T	C	T	0.244793	0.748602	2.75993e-06
chr17:10174713:T:A	17:10078030:T:A	T	A	0.198993	0.807758	1.75097e-07
chr17:10274527:T:C	17:10177844:T:C	T	C	0.0715339	0.930485	0.015616
chr17:1133944:T:C	17:1037159:T:C	T	C	0.466872	0.538192	0.00182425
chr17:11359270:T:A	17:11262587:T:A	T	A	0.106212	0.890328	0.000655217
chr17:12856499:C:T	17:12759816:C:T	C	T	0.0714181	0.933551	1.5279e-09
chr17:12885196:G:T	17:12788513:G:T	G	T	0.629	0.36774	0.0372839
chr17:13082895:C:T	17:12986212:C:T	C	T	0.212616	0.784326	0.0220514
chr17:14171261:A:G	17:14074578:A:G	A	G	0.0539591	0.94809	0.0048008
chr17:14197712:G:A	17:14101029:G:A	G	A	0.567254	0.441307	1.06662e-07
chr17:14813854:G:A	17:14717171:G:A	G	A	0.385837	0.61086	0.0372244
chr17:14910238:T:C	17:14813555:T:C	T	C	0.0687879	0.934647	2.27655e-05
chr17:15048860:A:G	17:14952177:A:G	A	G	0.0613089	0.936313	0.00253059
chr17:1549204:T:C	17:1452498:T:C	T	C	0.105791	0.898045	0.000119525
chr17:18779697:A:T	17:18683010:A:T	A	T	0.470389	0.533851	0.00889174
chr17:18969024:T:C	17:18872337:T:C	T	C	0.532692	0.47063	0.0402932
chr17:20124113:C:A	17:20027426:C:A	C	A	0.0582639	0.939118	0.000727489
chr17:20609728:A:G	17:20513041:A:G	A	G	0.0736661	0.929679	6.64274e-05
chr17:20758454:T:C	17:20661767:T:C	T	C	0.314154	0.693487	3.85725e-07
chr17:227387:C:T	17:77178:C:T	C	T	0.712137	0.284872	0.0421582
chr17:266640:A:G	17:116431:A:G	A	G	0.0724424	0.929364	0.0312728
chr17:26999795:T:C	17:25326821:T:C	T	C	0.0559914	0.945708	0.02158
chr17:28265920:T:C	17:26592946:T:C	T	C	0.545875	0.457371	0.0444481
chr17:314357:C:A	17:164148:C:A	C	A	0.0848499	0.918539	0.000173428
chr17:31676249:C:T	17:30003268:C:T	C	T	0.184816	0.811478	0.00347306
chr17:31701450:C:A	17:30028469:C:A	C	A	0.235532	0.761191	0.0184847
chr17:32309173:G:A	17:30636192:G:A	G	A	0.0681343	0.936849	3.03227e-09
chr17:32567044:C:T	17:30894062:C:T	C	T	0.41793	0.578125	0.0137303
chr17:35407398:C:T	17:33734417:C:T	C	T	0.542169	0.452145	0.000442671
chr17:3553441:T:C	17:3456735:T:C	T	C	0.471761	0.533093	0.00274717
chr17:36030783:A:G	17:34357820:A:G	A	G	0.106633	0.895584	0.0265899
chr17:39087980:G:A	17:37244233:G:A	G	A	0.264136	0.732401	0.0157913
chr17:39957033:C:T	17:38113286:C:T	C	T	0.645905	0.359445	0.000577513
chr17:40001742:C:T	17:38157995:C:T	C	T	0.35164	0.645121	0.0378938
chr17:40751862:G:A	17:38908114:G:A	G	A	0.938375	0.0584357	3.45281e-05
chr17:42214635:T:C	17:40366653:T:C	T	C	0.0710324	0.930858	0.0231617
chr17:43093449:G:A	17:41245466:G:A	G	A	0.305374	0.689904	0.00174509
chr17:43126360:G:A	17:41278377:G:A	G	A	0.307314	0.68709	0.000206427
chr17:45949373:G:A	17:44026739:G:A	G	A	0.344291	0.650621	0.00104452
chr17:4982687:G:A	17:4885982:G:A	G	A	0.61773	0.376665	0.000378152
chr17:49966298:G:T	17:48043662:G:T	G	T	0.0721549	0.932159	1.9668e-07
chr17:50063143:G:A	17:48140507:G:A	G	A	0.0852781	0.916652	0.0327218
chr17:51707602:G:A	17:49784962:G:A	G	A	0.411511	0.596935	1.27581e-07
chr17:53262017:T:C	17:51339378:T:C	T	C	0.0823971	0.925112	1.03885e-17
chr17:54229158:C:T	17:52306519:C:T	C	T	0.0660065	0.937047	0.000126395
chr17:54967964:G:A	17:53045325:G:A	G	A	0.291745	0.717735	1.32359e-10
chr17:56751417:A:G	17:54828778:A:G	A	G	0.763884	0.229806	4.07473e-06
chr17:57632019:A:G	17:55709380:A:G	A	G	0.222339	0.790998	2.26381e-22
chr17:5796200:C:T	17:5699520:C:T	C	T	0.0559238	0.946228	0.00382619
chr17:58293059:G:A	17:56370420:G:A	G	A	0.101152	0.900978	0.0291071
chr17:60148405:C:T	17:58225766:C:T	C	T	0.170305	0.825099	0.000191234
chr17:60469345:T:A	17:58546706:T:A	T	A	0.0525476	0.949097	0.0228458
chr17:61342508:T:C	17:59419869:T:C	T	C	0.850242	0.153267	0.0026837
chr17:61483102:C:T	17:59560463:C:T	C	T	0.105361	0.892098	0.0115131
chr17:63470201:G:A	17:61547562:G:A	G	A	0.624212	0.367368	8.46699e-08
chr17:65689056:C:T	17:63685174:C:T	C	T	0.332807	0.662545	0.00257671
chr17:67585137:C:A	17:65581253:C:A	C	A	0.214256	0.790628	0.000242781
chr17:68212616:G:T	17:66208757:G:T	G	T	0.227085	0.769707	0.0190958
chr17:68246719:G:A	17:66242860:G:A	G	A	0.157757	0.838579	0.00224801
chr17:70097145:C:T	17:68093286:C:T	C	T	0.8285	0.168853	0.0300849
chr17:70301146:G:T	17:68297287:G:T	G	T	0.0775033	0.906502	9.28407e-69
chr17:7114647:C:A	17:7017966:C:A	C	A	0.130972	0.866372	0.0160892
chr17:72039555:A:G	17:70035696:A:G	A	G	0.0804572	0.92301	8.3208e-05
chr17:72926836:C:T	17:70922975:C:T	C	T	0.380226	0.613287	4.28444e-05
chr17:73728198:C:T	17:71724337:C:T	C	T	0.0532554	0.944656	0.00494517
chr17:73982830:G:A	17:71978969:G:A	G	A	0.362294	0.627277	3.98025e-11
chr17:77126965:C:T	17:75123047:C:T	C	T	0.360949	0.630393	3.26856e-08
chr17:77265544:A:G	17:75261626:A:G	A	G	0.249694	0.755665	0.000132934
chr17:78472735:G:A	17:76468817:G:A	G	A	0.0994633	0.897354	0.0012367
chr17:78540605:T:C	17:76536687:T:C	T	C	0.767287	0.239191	2.65236e-06
chr17:78947889:C:T	17:76943971:C:T	C	T	0.15335	0.844303	0.0458971
chr17:79262832:C:T	17:77258914:C:T	C	T	0.675834	0.320857	0.0297641
chr17:79859127:C:T	17:77832926:C:T	C	T	0.259904	0.734837	0.000242865
chr17:79920407:A:G	17:77894206:A:G	A	G	0.543221	0.460155	0.03741
chr17:80452275:A:C	17:78426075:A:C	A	C	0.53575	0.467542	0.0427798
chr17:81020824:T:G	17:78994624:T:G	T	G	0.268894	0.737827	2.8673e-06
chr17:81050837:G:A	17:79024637:G:A	G	A	0.285739	0.718206	0.00701369
chr17:81151316:C:G	17:79125116:C:G	C	G	0.434598	0.577076	8.85034e-13
chr17:81688221:A:G	17:79655251:A:G	A	G	0.25186	0.751239	0.0276476
chr17:82092200:C:G	17:80050076:C:G	C	G	0.0625451	0.943019	5.01891e-13
chr17:82775673:G:A	17:80733549:G:A	G	A	0.370831	0.635738	2.98199e-05
chr17:82830616:A:G	17:80788492:A:G	A	G	0.406498	0.601399	8.15266e-07
chr17:82962889:G:A	17:80920765:G:A	G	A	0.214492	0.780938	0.000733017
chr17:82963169:A:G	17:80921045:A:G	A	G	0.473083	0.532052	0.00157712
chr17:82965660:C:T	17:80923536:C:T	C	T	0.258834	0.738087	0.0309226
chr17:82986017:T:G	17:80943893:T:G	T	G	0.377862	0.626831	0.00284416
chr17:878378:G:A	17:781618:G:A	G	A	0.159701	0.846857	3.49887e-08
chr17:9226155:T:G	17:9129472:T:G	T	G	0.508234	0.500769	3.29706e-08
chr18:10294578:G:T	18:10294575:G:T	G	T	0.285187	0.721804	1.82473e-06
chr18:10523469:G:T	18:10523466:G:T	G	T	0.310429	0.699005	3.47933e-10
chr18:10618074:C:T	18:10618071:C:T	C	T	0.623189	0.380991	0.0084703
chr18:11178039:G:C	18:11178038:G:C	G	C	0.221281	0.775396	0.0143228
chr18:12286543:A:G	18:12286542:A:G	A	G	0.30161	0.702663	0.00410057
chr18:12981827:C:T	18:12981826:C:T	C	T	0.424999	0.583949	2.56341e-08
chr18:13376127:A:G	18:13376126:A:G	A	G	0.469317	0.537629	1.99573e-05
chr18:13565376:C:T	18:13565375:C:T	C	T	0.209421	0.799641	6.93419e-12
chr18:13780468:C:T	18:13780467:C:T	C	T	0.865458	0.128549	4.85723e-08
chr18:22364597:G:A	18:19944560:G:A	G	A	0.226927	0.770123	0.0305337
chr18:25356733:A:G	18:22936697:A:G	A	G	0.15603	0.846333	0.0443585
chr18:26945592:A:G	18:24525556:A:G	A	G	0.176617	0.826099	0.0275733
chr18:274474:C:T	18:274474:C:T	C	T	0.102481	0.900646	0.00146099
chr18:2913433:T:C	18:2913431:T:C	T	C	0.17342	0.832059	7.95549e-06
chr18:3002232:A:C	18:3002230:A:C	A	C	0.16671	0.839797	7.29233e-08
chr18:3022362:T:C	18:3022360:T:C	T	C	0.424278	0.580351	0.00396282
chr18:3028718:T:A	18:3028716:T:A	T	A	0.0690982	0.922667	2.7512e-22
chr18:31996725:G:A	18:29576688:G:A	G	A	0.6487	0.342939	6.63058e-08
chr18:32018846:T:C	18:29598809:T:C	T	C	0.0715063	0.931179	0.001191
chr18:32084094:A:G	18:29664057:A:G	A	G	0.678235	0.325487	0.0145186
chr18:33467283:C:T	18:31047247:C:T	C	T	0.223913	0.780271	0.00238866
chr18:33832915:C:A	18:31412879:C:A	C	A	0.0623646	0.940656	0.000114365
chr18:34091638:G:A	18:31671602:G:A	G	A	0.487619	0.508322	0.0126886
chr18:36084195:G:A	18:33664158:G:A	G	A	0.626504	0.368959	0.00379723
chr18:36511369:C:T	18:34091332:C:T	C	T	0.605417	0.388564	0.000145882
chr18:38022110:T:A	18:35602074:T:A	T	A	0.060394	0.937442	0.00559317
chr18:42209748:C:T	18:39789713:C:T	C	T	0.099685	0.904994	1.45929e-06
chr18:43516270:G:T	18:41096235:G:T	G	T	0.404342	0.602567	1.53522e-05
chr18:46624416:T:G	18:44204379:T:G	T	G	0.0893593	0.91693	5.58266e-12
chr18:4780185:G:C	18:4780184:G:C	G	C	0.12827	0.876444	1.5571e-05
chr18:503893:T:C	18:503893:T:C	T	C	0.0631753	0.938572	0.0269894
chr18:51517224:C:A	18:49043594:C:A	C	A	0.281085	0.726285	4.30846e-07
chr18:51976594:T:C	18:49502964:T:C	T	C	0.0893731	0.914626	1.20748e-05
chr18:5585978:A:C	18:5585977:A:C	A	C	0.218687	0.784016	0.0433619
chr18:59077678:C:T	18:56744910:C:T	C	T	0.32331	0.671884	0.00159605
chr18:59529787:G:A	18:57197019:G:A	G	A	0.281321	0.712989	0.000114576
chr18:5961299:C:T	18:5961298:C:T	C	T	0.351529	0.643989	0.0039773
chr18:60019251:A:G	18:57686483:A:G	A	G	0.0595466	0.944198	7.48163e-07
chr18:60889128:A:G	18:58556361:A:G	A	G	0.0937604	0.90851	0.0162468
chr18:61841064:G:A	18:59508297:G:A	G	A	0.0501397	0.947613	0.00187773
chr18:62253205:C:G	18:59920438:C:G	C	G	0.0648084	0.936912	0.0310195
chr18:62354271:T:G	18:60021504:T:G	T	G	0.68797	0.315073	0.0439773
chr18:6393088:A:T	18:6393087:A:T	A	T	0.518799	0.475929	0.00116802
chr18:67937385:T:G	18:65604622:T:G	T	G	0.134475	0.871573	3.64847e-08
chr18:68167087:C:G	18:65834324:C:G	C	G	0.146886	0.855444	0.0422497
chr18:68530003:A:G	18:66197240:A:G	A	G	0.0542124	0.947252	0.0467463
chr18:6922859:A:C	18:6922858:A:C	A	C	0.563054	0.428777	3.86223e-07
chr18:6928181:G:T	18:6928180:G:T	G	T	0.512501	0.482022	0.000739503
chr18:6942998:A:G	18:6942997:A:G	A	G	0.857243	0.154028	1.12888e-22
chr18:69655424:G:A	18:67322660:G:A	G	A	0.437799	0.552134	5.90813e-10
chr18:71681365:G:C	18:69348601:G:C	G	C	0.172697	0.829801	0.0406124
chr18:722814:T:C	18:722814:T:C	T	C	0.177937	0.818982	0.0135475
chr18:72827731:A:G	18:70494966:A:G	A	G	0.48556	0.507623	2.60325e-05
chr18:73752554:T:C	18:71419789:T:C	T	C	0.944025	0.0541212	0.0122192
chr18:74367825:C:T	18:72035060:C:T	C	T	0.304537	0.699149	0.0134511
chr18:75222992:G:C	18:72934947:G:C	G	C	0.204159	0.790675	9.47261e-05
chr18:75606632:C:G	18:73318587:C:G	C	G	0.0756252	0.926745	0.00550446
chr18:765056:C:T	18:765057:C:T	C	T	0.332365	0.672056	0.00379255
chr18:76580329:A:G	18:74292286:A:G	A	G	0.560529	0.443068	0.0256561
chr18:76580715:A:G	18:74292672:A:G	A	G	0.18398	0.83683	4.24387e-63
chr18:77097894:C:T	18:74809850:C:T	C	T	0.0872046	0.914724	0.0349557
chr18:78683577:G:A	18:76443577:G:A	G	A	0.486664	0.519013	0.000461939
chr18:79678688:T:C	18:77438688:T:C	T	C	0.753073	0.252701	4.62584e-05
chr18:8563408:G:A	18:8563406:G:A	G	A	0.275316	0.715138	8.53533e-11
chr18:8784725:A:G	18:8784723:A:G	A	G	0.148224	0.854664	0.0118105
chr18:908228:A:T	18:908229:A:T	A	T	0.0679776	0.935884	1.79662e-06
chr19:10055557:C:T	19:10166233:C:T	C	T	0.313806	0.681425	0.00159762
chr19:10086755:T:A	19:10197431:T:A	T	A	0.0966328	0.907803	3.64433e-06
chr19:10356095:G:C	19:10466771:G:C	G	C	0.0925519	0.909623	0.02063
chr19:10829116:T:C	19:10939792:T:C	T	C	0.291256	0.714258	0.000185662
chr19:11057353:T:C	19:11168029:T:C	T	C	0.274959	0.728572	0.0146624
chr19:11060605:A:C	19:11171281:A:C	A	C	0.266735	0.747696	6.98605e-24
chr19:11079434:A:G	19:11190110:A:G	A	G	0.129543	0.872605	0.0483935
chr19:11192878:A:G	19:11303554:A:G	A	G	0.0804404	0.921353	0.0416271
chr19:15046425:A:T	19:15157236:A:T	A	T	0.196549	0.812364	4.74053e-12
chr19:15470214:A:C	19:15581025:A:C	A	C	0.375174	0.628427	0.0216855
chr19:15571696:C:G	19:15682507:C:G	C	G	0.168823	0.827203	0.00115653
chr19:16033776:A:G	19:16144586:A:G	A	G	0.482661	0.530198	3.66202e-15
chr19:1648827:G:T	19:1648826:G:T	G	T	0.180774	0.814874	0.000559549
chr19:1677697:T:C	19:1677696:T:C	T	C	0.150479	0.852124	0.0242703
chr19:17035722:G:A	19:17146532:G:A	G	A	0.365076	0.630496	0.00476886
chr19:17561773:G:A	19:17672582:G:A	G	A	0.182477	0.814969	0.0431768
chr19:17675939:C:T	19:17786748:C:T	C	T	0.16525	0.8318	0.0152395
chr19:1806464:G:A	19:1806463:G:A	G	A	0.214304	0.782529	0.0181204
chr19:18409421:A:G	19:18520231:A:G	A	G	0.190328	0.816348	1.41286e-07
chr19:1843494:G:A	19:1843493:G:A	G	A	0.235684	0.760153	0.002822
chr19:18670146:G:A	19:18780956:G:A	G	A	0.0791569	0.923267	0.00542862
chr19:1871342:T:C	19:1871341:T:C	T	C	0.664063	0.339031	0.0455235
chr19:18733554:G:A	19:18844364:G:A	G	A	0.220826	0.772832	3.1976e-06
chr19:19117968:C:A	19:19228777:C:A	C	A	0.119501	0.884379	0.000222683
chr19:19137298:C:T	19:19248107:C:T	C	T	0.645746	0.349495	0.00216602
chr19:19264563:G:A	19:19375372:G:A	G	A	0.162437	0.832684	5.70546e-05
chr19:20536964:G:C	19:20719770:G:C	G	C	0.0648874	0.937924	0.00038653
chr19:2094593:C:T	19:2094592:C:T	C	T	0.0594272	0.938866	0.0288153
chr19:20948765:A:G	19:21131571:A:G	A	G	0.11163	0.908627	1.74399e-93
chr19:22041953:T:C	19:22224755:T:C	T	C	0.152734	0.850833	0.00211718
chr19:29048375:G:T	19:29539282:G:T	G	T	0.0801191	0.918098	0.045422
chr19:29129222:T:C	19:29620129:T:C	T	C	0.0792275	0.923381	0.0028672
chr19:29598772:G:A	19:30089679:G:A	G	A	0.0834763	0.913691	0.00188021
chr19:29872700:C:T	19:30363607:C:T	C	T	0.339382	0.65683	0.0138991
chr19:30172353:A:G	19:30663260:A:G	A	G	0.0647844	0.938749	7.62399e-06
chr19:3192300:A:G	19:3192298:A:G	A	G	0.410995	0.595205	0.000105168
chr19:32199815:C:T	19:32690721:C:T	C	T	0.682346	0.311422	3.59659e-05
chr19:33008072:A:G	19:33498978:A:G	A	G	0.431627	0.576878	1.36443e-07
chr19:3337706:G:A	19:3337704:G:A	G	A	0.432831	0.562742	0.00608588
chr19:33474993:A:G	19:33965899:A:G	A	G	0.0925203	0.911699	6.98275e-06
chr19:33702822:G:A	19:34193727:G:A	G	A	0.122448	0.875375	0.0429486
chr19:33704188:C:T	19:34195093:C:T	C	T	0.0600607	0.941908	0.0103865
chr19:33759718:C:T	19:34250623:C:T	C	T	0.144962	0.852061	0.00983208
chr19:33786309:T:C	19:34277214:T:C	T	C	0.25928	0.745721	0.000432737
chr19:33882224:A:G	19:34373129:A:G	A	G	0.127801	0.886452	1.31247e-38
chr19:34720071:A:C	19:35210976:A:C	A	C	0.131177	0.866146	0.0155736
chr19:3481215:C:T	19:3481213:C:T	C	T	0.177743	0.818297	0.0015966
chr19:34990070:T:G	19:35480974:T:G	T	G	0.147004	0.855617	0.021926
chr19:38304110:G:A	19:38794750:G:A	G	A	0.157125	0.850728	2.88735e-11
chr19:38358156:A:G	19:38848796:A:G	A	G	0.156984	0.845861	0.0159405
chr19:38727754:A:G	19:39218394:A:G	A	G	0.06146	0.946195	6.34802e-24
chr19:38738449:A:G	19:39229089:A:G	A	G	0.0865648	0.917422	1.05946e-05
chr19:39475036:G:A	19:39965676:G:A	G	A	0.157621	0.839575	0.0183148
chr19:39480792:G:C	19:39971432:G:C	G	C	0.159426	0.837859	0.0235272
chr19:41137161:T:C	19:41643066:T:C	T	C	0.864738	0.138144	0.0100625
chr19:4116654:A:G	19:4116652:A:G	A	G	0.771948	0.231136	0.0245183
chr19:42038314:A:C	19:42542466:A:C	A	C	0.11215	0.896038	4.80852e-16
chr19:43614039:G:A	19:44118191:G:A	G	A	0.231068	0.764876	0.00317961
chr19:44870308:G:A	19:45373565:G:A	G	A	0.161235	0.835399	0.00510897
chr19:44876259:G:A	19:45379516:G:A	G	A	0.129999	0.867399	0.0178539
chr19:4575361:G:A	19:4575373:G:A	G	A	0.453328	0.541607	0.00180658
chr19:4863847:C:G	19:4863859:C:G	C	G	0.905691	0.0922763	0.0316456
chr19:49010276:A:G	19:49513533:A:G	A	G	0.942926	0.0587898	0.0245128
chr19:4967514:C:G	19:4967525:C:G	C	G	0.118622	0.879185	0.0382474
chr19:50656314:T:G	19:51159571:T:G	T	G	0.875968	0.126366	0.0307059
chr19:50963260:A:G	19:51466516:A:G	A	G	0.335977	0.667634	0.018556
chr19:50972393:G:A	19:51475649:G:A	G	A	0.767263	0.22786	0.000355439
chr19:51834930:C:T	19:52338183:C:T	C	T	0.104425	0.899057	0.000416279
chr19:53036877:T:C	19:53540130:T:C	T	C	0.0724254	0.929327	0.0359198
chr19:53037859:C:A	19:53541112:C:A	C	A	0.846441	0.150745	0.0157889
chr19:53423602:T:C	19:53926855:T:C	T	C	0.157596	0.858367	1.05594e-41
chr19:5359590:A:G	19:5359601:A:G	A	G	0.440797	0.563895	0.00358771
chr19:53633029:C:T	19:54136283:C:T	C	T	0.397663	0.594595	1.26877e-06
chr19:53763297:G:A	19:54266551:G:A	G	A	0.124599	0.881117	9.23515e-08
chr19:54011694:T:C	19:54514948:T:C	T	C	0.694739	0.27989	1.57813e-66
chr19:5406412:A:G	19:5406423:A:G	A	G	0.234514	0.770318	0.000441098
chr19:55170678:C:T	19:55682046:C:T	C	T	0.176919	0.820363	0.0288628
chr19:55228147:T:C	19:55739515:T:C	T	C	0.641567	0.36882	3.72278e-11
chr19:55320208:A:C	19:55831576:A:C	A	C	0.385692	0.618165	0.0146711
chr19:55533698:A:T	19:56045065:A:T	A	T	0.822036	0.187499	5.61604e-14
chr19:55566929:G:A	19:56078295:G:A	G	A	0.104963	0.892286	0.00604338
chr19:5590995:T:C	19:5591006:T:C	T	C	0.70284	0.300705	0.017541
chr19:55948092:C:T	19:56459458:C:T	C	T	0.0694873	0.928732	0.0329548
chr19:56083896:A:G	19:56595262:A:G	A	G	0.415628	0.590706	7.56085e-05
chr19:56957285:G:T	19:57468653:G:T	G	T	0.899135	0.0971048	0.00011305
chr19:57172246:C:T	19:57683614:C:T	C	T	0.127174	0.870608	0.0429548
chr19:57186176:A:G	19:57697544:A:G	A	G	0.321128	0.681972	0.0406718
chr19:5759220:T:G	19:5759231:T:G	T	G	0.833888	0.170701	0.000182284
chr19:606473:T:C	19:606473:T:C	T	C	0.448447	0.56348	2.32873e-13
chr19:608511:G:A	19:608511:G:A	G	A	0.281513	0.727133	3.11858e-09
chr19:7257433:C:T	19:7257444:C:T	C	T	0.0728461	0.929216	0.0143516
chr19:7626579:G:A	19:7691465:G:A	G	A	0.156692	0.840617	0.0240138
chr19:8656154:C:A	19:8765593:C:A	C	A	0.266166	0.730937	0.0442239
chr19:8678357:T:C	19:8788618:T:C	T	C	0.202216	0.80808	2.85082e-15
chr19:8840208:G:T	19:8950884:G:T	G	T	0.296258	0.710246	1.14532e-05
chr19:9136282:T:C	19:9246958:T:C	T	C	0.110436	0.875162	4.34437e-43
chr19:9970646:G:A	19:10081322:G:A	G	A	0.0906785	0.906715	0.00588645
chr2:101993813:G:C	2:102610275:G:C	G	C	0.134607	0.862793	0.0197564
chr2:102193708:T:G	2:102810168:T:G	T	G	0.148147	0.849406	0.0348937
chr2:10330074:G:A	2:10470200:G:A	G	A	0.0721445	0.929825	0.01876
chr2:103894919:A:T	2:104511377:A:T	A	T	0.0552297	0.939136	1.20934e-13
chr2:104418371:A:T	2:105034829:A:T	A	T	0.378687	0.614859	4.13682e-05
chr2:106043267:C:T	2:106659723:C:T	C	T	0.0936356	0.90929	0.0018105
chr2:106273267:A:C	2:106889723:A:C	A	C	0.333888	0.669687	0.0195819
chr2:107488837:T:C	2:108105293:T:C	T	C	0.682787	0.310531	9.07276e-06
chr2:111274883:A:G	2:112032460:A:G	A	G	0.587452	0.416508	0.013598
chr2:111289587:G:C	2:112047164:G:C	G	C	0.104834	0.897807	0.00757848
chr2:111307816:C:T	2:112065393:C:T	C	T	0.282811	0.722024	0.000935801
chr2:111396975:A:G	2:112154552:A:G	A	G	0.289141	0.714525	0.0127776
chr2:111410354:T:C	2:112167931:T:C	T	C	0.241842	0.762818	0.000797509
chr2:111876762:C:T	2:112634339:C:T	C	T	0.674556	0.320104	0.000441138
chr2:113224566:G:A	2:113982143:G:A	G	A	0.35353	0.63617	5.50599e-11
chr2:115806847:A:G	2:116564423:A:G	A	G	0.0873367	0.91495	0.0123974
chr2:11864032:T:C	2:12004158:T:C	T	C	0.0548095	0.946669	0.0452339
chr2:118859500:G:A	2:119617076:G:A	G	A	0.220108	0.776519	0.0126367
chr2:119519867:A:C	2:120277443:A:C	A	C	0.715152	0.281351	0.0165334
chr2:120566498:G:T	2:121324074:G:T	G	T	0.117587	0.879886	0.0164449
chr2:122781589:G:A	2:123539165:G:A	G	A	0.0861223	0.916294	0.00784169
chr2:125832942:T:C	2:126590519:T:C	T	C	0.0761988	0.925918	0.013197
chr2:12609947:G:A	2:12750073:G:A	G	A	0.0567449	0.945498	0.00294291
chr2:127190271:T:A	2:127947847:T:A	T	A	0.123632	0.878709	0.0279722
chr2:127361337:A:T	2:128118913:A:T	A	T	0.805607	0.190802	0.00521919
chr2:128241335:G:A	2:128998909:G:A	G	A	0.924184	0.0691593	2.17054e-15
chr2:128367806:G:A	2:129125380:G:A	G	A	0.0721317	0.925464	0.00480552
chr2:131790564:A:G	2:132548137:A:G	A	G	0.196869	0.810204	3.59206e-08
chr2:132528902:T:C	2:133286475:T:C	T	C	0.43505	0.568157	0.0465583
chr2:136749687:G:T	2:137507257:G:T	G	T	0.489748	0.502737	3.69089e-06
chr2:140217562:G:C	2:140975131:G:C	G	C	0.0746161	0.936841	7.90926e-44
chr2:140597425:A:G	2:141354994:A:G	A	G	0.363253	0.632168	0.00343737
chr2:141255117:T:C	2:142012686:T:C	T	C	0.215628	0.788095	0.00517247
chr2:143659900:C:T	2:144417469:C:T	C	T	0.154355	0.851597	3.72715e-07
chr2:143813501:A:G	2:144571070:A:G	A	G	0.329414	0.67676	5.2091e-05
chr2:144378986:T:C	2:145136553:T:C	T	C	0.092357	0.90507	0.0070246
chr2:1456232:G:T	2:1460004:G:T	G	T	0.374752	0.620977	0.00663056
chr2:147334642:G:T	2:148092210:G:T	G	T	0.193356	0.812151	1.87161e-05
chr2:1490511:T:C	2:1494283:T:C	T	C	0.399575	0.603654	0.0431288
chr2:152375831:A:G	2:153232345:A:G	A	G	0.0767518	0.926087	0.000996138
chr2:152878679:C:T	2:153735193:C:T	C	T	0.173815	0.822338	0.00192891
chr2:155609891:G:A	2:156466403:G:A	G	A	0.413069	0.582538	0.00602377
chr2:159797209:C:T	2:160653720:C:T	C	T	0.594451	0.409597	0.0110986
chr2:168448045:C:A	2:169304555:C:A	C	A	0.922946	0.0699132	2.72148e-17
chr2:173298777:G:C	2:174163505:G:C	G	C	0.0963335	0.906056	0.012016
chr2:173313627:T:C	2:174178355:T:C	T	C	0.161822	0.84153	0.00494457
chr2:176735123:G:A	2:177599851:G:A	G	A	0.078421	0.924248	0.00203561
chr2:177024810:G:A	2:177889538:G:A	G	A	0.201713	0.804513	1.71044e-06
chr2:177107961:A:G	2:177972689:A:G	A	G	0.812452	0.184374	0.0117699
chr2:177997733:A:C	2:178862460:A:C	A	C	0.22291	0.790601	7.47545e-24
chr2:181509254:T:C	2:182373981:T:C	T	C	0.725626	0.277269	0.0455712
chr2:186242509:T:C	2:187107236:T:C	T	C	0.173831	0.802236	1.57266e-77
chr2:190647713:T:C	2:191512439:T:C	T	C	0.225651	0.768084	4.63289e-06
chr2:19933460:C:T	2:20133221:C:T	C	T	0.0564784	0.94154	0.00922996
chr2:202135994:A:T	2:203000717:A:T	A	T	0.372579	0.6379	2.61709e-11
chr2:202250262:C:T	2:203114985:C:T	C	T	0.876064	0.120614	0.00175515
chr2:204257108:T:G	2:205121831:T:G	T	G	0.296067	0.710396	1.30809e-05
chr2:20517365:C:T	2:20717125:C:T	C	T	0.23228	0.762624	0.000221574
chr2:205570674:T:C	2:206435398:T:C	T	C	0.630229	0.380337	2.10328e-11
chr2:211461917:A:C	2:212326642:A:C	A	C	0.759044	0.237744	0.0202863
chr2:211752816:C:A	2:212617541:C:A	C	A	0.469688	0.535411	0.00159336
chr2:213147681:A:C	2:214012405:A:C	A	C	0.94429	0.0515317	1.01357e-08
chr2:215463584:G:A	2:216328307:G:A	G	A	0.0922405	0.909859	0.0252417
chr2:219268115:T:C	2:220132837:T:C	T	C	0.0828018	0.919771	0.00382881
chr2:219556063:G:A	2:220420785:G:A	G	A	0.262723	0.73239	0.00066881
chr2:220908889:C:T	2:221773609:C:T	C	T	0.198469	0.809878	1.10704e-10
chr2:221954172:A:G	2:222818891:A:G	A	G	0.169545	0.833033	0.0338263
chr2:222841328:T:G	2:223706046:T:G	T	G	0.439854	0.551714	1.829e-07
chr2:223142306:A:G	2:224007024:A:G	A	G	0.883059	0.107102	5.53059e-22
chr2:225367898:T:C	2:226232614:T:C	T	C	0.0596111	0.942315	0.0119884
chr2:227226945:G:A	2:228091661:G:A	G	A	0.481635	0.514677	0.0226995
chr2:227431662:C:T	2:228296378:C:T	C	T	0.594417	0.400969	0.00393838
chr2:22839226:C:T	2:23062098:C:T	C	T	0.0556827	0.946267	0.00879243
chr2:230383546:C:T	2:231248261:C:T	C	T	0.157575	0.844951	0.0320005
chr2:231331885:G:A	2:232196597:G:A	G	A	0.324684	0.670038	0.000540961
chr2:232715581:A:G	2:233580291:A:G	A	G	0.305225	0.706337	1.11544e-14
chr2:233617178:G:A	2:234525824:G:A	G	A	0.129838	0.872304	0.0489442
chr2:233670047:T:G	2:234578693:T:G	T	G	0.190993	0.817965	1.31343e-12
chr2:233673438:C:T	2:234582084:C:T	C	T	0.187865	0.806416	8.6831e-06
chr2:233711220:T:A	2:234619866:T:A	T	A	0.104709	0.899989	1.90174e-06
chr2:233713464:C:G	2:234622110:C:G	C	G	0.104234	0.898233	0.0125506
chr2:233784736:G:A	2:234693382:G:A	G	A	0.61856	0.375207	7.90695e-05
chr2:234713224:G:A	2:235621868:G:A	G	A	0.333797	0.67896	8.60881e-17
chr2:236793649:G:T	2:237702292:G:T	G	T	0.108706	0.888645	0.00937869
chr2:237907559:C:T	2:238816201:C:T	C	T	0.232597	0.771588	0.00224935
chr2:238397627:A:C	2:239306268:A:C	A	C	0.0589436	0.944172	4.37749e-05
chr2:238911116:A:C	2:239832812:A:C	A	C	0.558756	0.446017	0.00312142
chr2:239149397:T:A	2:240071093:T:A	T	A	0.256255	0.746946	0.0234991
chr2:239149551:G:A	2:240071247:G:A	G	A	0.22059	0.775028	0.00120192
chr2:239430820:T:C	2:240352514:T:C	T	C	0.59972	0.404653	0.0060211
chr2:239676376:A:G	2:240598070:A:G	A	G	0.0570829	0.944962	0.00624105
chr2:240800117:C:T	2:241739534:C:T	C	T	0.302774	0.67971	3.46299e-31
chr2:241550502:T:C	2:242489917:T:C	T	C	0.535251	0.469698	0.00234384
chr2:241575747:C:T	2:242515162:C:T	C	T	0.212702	0.783056	0.00153268
chr2:2520643:C:T	2:2524415:C:T	C	T	0.0830125	0.91382	0.000508061
chr2:26015880:G:A	2:26238749:G:A	G	A	0.923564	0.0746023	0.0324909
chr2:27525730:C:A	2:27748597:C:A	C	A	0.580243	0.428921	1.16784e-08
chr2:30400464:C:T	2:30623330:C:T	C	T	0.435844	0.56928	0.00145337
chr2:30648942:G:A	2:30871808:G:A	G	A	0.800805	0.201832	0.0420196
chr2:30865615:T:C	2:31088481:T:C	T	C	0.0671856	0.935883	0.000132822
chr2:31278295:C:A	2:31501161:C:A	C	A	0.0815073	0.921586	0.000488572
chr2:31739469:G:T	2:31964538:G:T	G	T	0.118514	0.886637	6.85753e-07
chr2:33229199:A:G	2:33454266:A:G	A	G	0.494225	0.509093	0.0411033
chr2:33551676:A:G	2:33776743:A:G	A	G	0.123141	0.881005	9.40945e-05
chr2:34074321:T:G	2:34299388:T:G	T	G	0.0811433	0.925842	1.32268e-15
chr2:35655517:A:T	2:35880583:A:T	A	T	0.207275	0.797926	7.55943e-05
chr2:38062617:T:A	2:38289760:T:A	T	A	0.197133	0.792691	5.43434e-15
chr2:38281622:G:A	2:38508764:G:A	G	A	0.185303	0.811782	0.0219032
chr2:38737389:A:G	2:38964531:A:G	A	G	0.252487	0.75081	0.019168
chr2:40194512:C:T	2:40421652:C:T	C	T	0.229014	0.77429	0.0156776
chr2:41903166:C:A	2:42130306:C:A	C	A	0.170203	0.826297	0.00438178
chr2:42882443:A:G	2:43109583:A:G	A	G	0.175961	0.828885	8.6584e-05
chr2:42970770:T:A	2:43197910:T:A	T	A	0.342612	0.653052	0.00495166
chr2:44503978:G:A	2:44731117:G:A	G	A	0.708132	0.296285	0.00279214
chr2:44980729:T:C	2:45207868:T:C	T	C	0.472429	0.535271	2.29412e-06
chr2:46272597:G:A	2:46499736:G:A	G	A	0.417613	0.569878	9.26414e-15
chr2:47632197:G:C	2:47859336:G:C	G	C	0.09192	0.905757	0.0142235
chr2:47678875:T:G	2:47906014:T:G	T	G	0.127972	0.877761	1.1787e-07
chr2:48325841:T:G	2:48552980:T:G	T	G	0.0526876	0.948917	0.0269042
chr2:49222916:A:T	2:49450055:A:T	A	T	0.110753	0.885457	0.000243664
chr2:49385073:G:T	2:49612212:G:T	G	T	0.103943	0.899191	0.00149804
chr2:49475722:T:C	2:49702860:T:C	T	C	0.0614687	0.940217	0.030425
chr2:5255740:T:C	2:5395873:T:C	T	C	0.410119	0.593998	0.00984172
chr2:53270492:T:G	2:53497630:T:G	T	G	0.0674608	0.939299	1.80235e-17
chr2:53515993:C:T	2:53743131:C:T	C	T	0.353997	0.640374	0.000306119
chr2:54808145:C:T	2:55035282:C:T	C	T	0.137042	0.857023	1.76861e-07
chr2:54924406:C:T	2:55151543:C:T	C	T	0.906789	0.0954541	0.0186567
chr2:55890479:T:C	2:56117614:T:C	T	C	0.159026	0.847314	7.32687e-08
chr2:55923214:T:C	2:56150349:T:C	T	C	0.0550743	0.947214	0.00178806
chr2:57128527:A:G	2:57355662:A:G	A	G	0.327067	0.682232	1.05211e-09
chr2:59625468:A:G	2:59852603:A:G	A	G	0.796204	0.209293	3.33834e-05
chr2:59794827:C:T	2:60021962:C:T	C	T	0.540151	0.456155	0.0223213
chr2:59806571:C:A	2:60033706:C:A	C	A	0.6415	0.361817	0.033213
chr2:61458691:T:C	2:61685826:T:C	T	C	0.0987079	0.905476	1.5005e-05
chr2:630509:T:C	2:630509:T:C	T	C	0.849448	0.152988	0.0368101
chr2:630903:A:G	2:630903:A:G	A	G	0.849508	0.153733	0.00564664
chr2:635866:A:G	2:635866:A:G	A	G	0.849469	0.155844	5.92905e-06
chr2:63949661:C:T	2:64176795:C:T	C	T	0.100445	0.903257	0.000146407
chr2:64860098:C:G	2:65087232:C:G	C	G	0.213034	0.791894	0.000193935
chr2:64987606:T:C	2:65214740:T:C	T	C	0.154668	0.848377	0.0092652
chr2:65072166:G:C	2:65299300:G:C	G	C	0.103649	0.898779	0.0138088
chr2:67735856:T:C	2:67962988:T:C	T	C	0.547786	0.456104	0.0161334
chr2:6813803:G:A	2:6953934:G:A	G	A	0.0590814	0.93847	0.00167279
chr2:70576548:T:C	2:70803680:T:C	T	C	0.10238	0.900976	0.000580119
chr2:71153225:G:C	2:71380355:G:C	G	C	0.150361	0.855264	1.03759e-06
chr2:74815845:T:C	2:75042972:T:C	T	C	0.563517	0.441556	0.00164235
chr2:7494692:A:G	2:7634823:A:G	A	G	0.187534	0.818015	1.17687e-05
chr2:75581006:T:G	2:75808132:T:G	T	G	0.150536	0.858025	9.5879e-14
chr2:75633823:C:T	2:75860949:C:T	C	T	0.357715	0.655048	2.6424e-16
chr2:76542887:G:A	2:76770013:G:A	G	A	0.782748	0.221857	0.000599795
chr2:777141:G:A	2:777138:G:A	G	A	0.167587	0.82692	7.77261e-06
chr2:78721244:T:C	2:78948370:T:C	T	C	0.159442	0.833365	2.49617e-09
chr2:79073175:C:T	2:79300301:C:T	C	T	0.512148	0.494612	3.12477e-05
chr2:79662490:C:A	2:79889616:C:A	C	A	0.631352	0.364395	0.00664779
chr2:79865597:G:T	2:80092723:G:T	G	T	0.157435	0.839809	0.0203249
chr2:85596955:C:T	2:85824078:C:T	C	T	0.0550343	0.946446	0.0445074
chr2:98747327:A:G	2:99363790:A:G	A	G	0.373342	0.631342	0.00293874
chr20:10089954:T:C	20:10070602:T:C	T	C	0.0546366	0.948403	3.00309e-05
chr20:10659553:A:G	20:10640201:A:G	A	G	0.773704	0.229338	0.0251493
chr20:10853430:T:C	20:10834078:T:C	T	C	0.702983	0.301902	0.00105219
chr20:11789183:A:G	20:11769831:A:G	A	G	0.302404	0.701676	0.00632067
chr20:11870313:C:A	20:11850961:C:A	C	A	0.322459	0.67368	0.0111172
chr20:12030397:C:G	20:12011045:C:G	C	G	0.0933743	0.903915	0.00431401
chr20:15019174:C:T	20:14999820:C:T	C	T	0.117936	0.879533	0.016931
chr20:15618886:G:A	20:15599531:G:A	G	A	0.0974486	0.906401	5.41737e-05
chr20:16264239:C:T	20:16244884:C:T	C	T	0.151288	0.845843	0.0144146
chr20:17740536:C:T	20:17721181:C:T	C	T	0.068893	0.934419	5.45188e-05
chr20:17865111:T:C	20:17845755:T:C	T	C	0.851171	0.154392	2.20221e-06
chr20:18447789:T:G	20:18428433:T:G	T	G	0.304874	0.698149	0.0426888
chr20:2213840:A:G	20:2194486:A:G	A	G	0.106394	0.896418	0.00487765
chr20:22274535:G:T	20:22255173:G:T	G	T	0.317999	0.67513	6.65902e-06
chr20:22816851:T:A	20:22797489:T:A	T	A	0.110422	0.89203	0.0157459
chr20:23130619:C:T	20:23111256:C:T	C	T	0.910992	0.0862848	0.00302151
chr20:23638399:C:CCA	20:23619036:C:CCA	C	CCA	0.195209	0.809795	9.87433e-05
chr20:23724866:C:T	20:23705503:C:T	C	T	0.0659214	0.936217	0.00745013
chr20:2674279:A:C	20:2654925:A:C	A	C	0.655488	0.34949	0.00125206
chr20:30371231:A:G	20:29605907:A:G	A	G	0.388814	0.614787	0.0230575
chr20:31225258:A:G	20:29813061:A:G	A	G	0.840238	0.164074	0.000334362
chr20:3393065:T:G	20:3373712:T:G	T	G	0.2041	0.802057	2.07547e-06
chr20:347011:G:C	20:327655:G:C	G	C	0.0791573	0.913698	1.15957e-15
chr20:35139070:C:T	20:33726873:C:T	C	T	0.0975311	0.89997	0.0103186
chr20:35790210:T:G	20:34378132:T:G	T	G	0.111879	0.875289	4.16827e-34
chr20:35834679:G:A	20:34422601:G:A	G	A	0.100939	0.896982	0.0347095
chr20:37448433:A:G	20:36076835:A:G	A	G	0.0933697	0.90901	0.011174
chr20:38271641:C:T	20:36900043:C:T	C	T	0.084749	0.913173	0.0227286
chr20:41472251:A:G	20:40100891:A:G	A	G	0.236231	0.76015	0.00902359
chr20:42824925:T:C	20:41453565:T:C	T	C	0.069052	0.929209	0.0363947
chr20:42983785:T:C	20:41612425:T:C	T	C	0.493952	0.510033	0.0140118
chr20:46089588:A:G	20:44718227:A:G	A	G	0.223542	0.77992	0.0102304
chr20:462199:G:C	20:442843:G:C	G	C	0.0549962	0.948013	4.823e-05
chr20:46552829:T:C	20:45181468:T:C	T	C	0.862442	0.140619	0.00667161
chr20:47754292:T:C	20:46383036:T:C	T	C	0.0625013	0.94165	7.72057e-08
chr20:4784663:G:A	20:4765309:G:A	G	A	0.118093	0.885179	0.00175934
chr20:4798891:C:A	20:4779537:C:A	C	A	0.333684	0.672905	1.66025e-05
chr20:48633167:C:T	20:47249705:C:T	C	T	0.211298	0.79132	0.0475112
chr20:50026165:C:T	20:48642702:C:T	C	T	0.189515	0.804166	9.75808e-07
chr20:50029855:C:T	20:48646392:C:T	C	T	0.0684189	0.934827	6.43119e-05
chr20:50124008:G:A	20:48740545:G:A	G	A	0.278557	0.713764	1.72707e-07
chr20:50312792:G:A	20:48929329:G:A	G	A	0.475589	0.518284	0.000160993
chr20:50387503:C:T	20:49004040:C:T	C	T	0.639463	0.346984	3.81212e-18
chr20:51859596:G:A	20:50476135:G:A	G	A	0.175599	0.820298	0.000979798
chr20:53495477:C:T	20:52112016:C:T	C	T	0.359568	0.646522	9.10489e-05
chr20:53751361:T:G	20:52367900:T:G	T	G	0.377307	0.63531	1.1813e-15
chr20:57588884:A:G	20:56163940:A:G	A	G	0.749074	0.255544	0.00109634
chr20:57610247:G:A	20:56185303:G:A	G	A	0.0579319	0.944716	0.00041803
chr20:57919853:G:T	20:56494909:G:T	G	T	0.127193	0.869325	0.00147132
chr20:60030377:T:G	20:58605432:T:G	T	G	0.139486	0.857253	0.00406474
chr20:61557843:A:G	20:60132899:A:G	A	G	0.0837682	0.918558	0.00955113
chr20:62152469:G:A	20:60727525:G:A	G	A	0.87447	0.120635	4.40043e-06
chr20:62614595:G:A	20:61211802:G:A	G	A	0.807995	0.188703	0.00958846
chr20:62822197:G:A	20:61453549:G:A	G	A	0.276683	0.718539	0.00112486
chr20:62875074:C:A	20:61506426:C:A	C	A	0.152384	0.85456	2.62698e-09
chr20:63064383:T:C	20:61695735:T:C	T	C	0.615373	0.393288	5.79143e-08
chr20:63420901:T:C	20:62052254:T:C	T	C	0.55547	0.453912	7.18382e-09
chr20:63717555:A:G	20:62348907:A:G	A	G	0.69438	0.310443	0.00133298
chr20:775431:G:A	20:756074:G:A	G	A	0.272484	0.723985	0.0153397
chr20:8590628:T:C	20:8571275:T:C	T	C	0.0942868	0.908557	0.00253251
chr20:914775:A:G	20:895418:A:G	A	G	0.558809	0.446876	0.000436582
chr21:13245953:T:C	21:14618274:T:C	T	C	0.549978	0.464775	1.31869e-19
chr21:14051307:G:T	21:15423628:G:T	G	T	0.345971	0.650959	0.0466639
chr21:14080266:T:C	21:15452587:T:C	T	C	0.290533	0.716422	2.16754e-06
chr21:14237788:A:G	21:15610109:A:G	A	G	0.268094	0.735475	0.0129482
chr21:17786289:T:C	21:19158606:T:C	T	C	0.502187	0.502673	0.00273492
chr21:18504794:A:T	21:19877112:A:T	A	T	0.264087	0.7487	4.98093e-19
chr21:19205093:T:C	21:20577411:T:C	T	C	0.316459	0.687822	0.00453506
chr21:20052082:C:G	21:21424395:C:G	C	G	0.339031	0.665509	0.00307874
chr21:20744842:A:C	21:22117160:A:C	A	C	0.0973872	0.909938	1.26573e-14
chr21:21913505:A:C	21:23285825:A:C	A	C	0.225917	0.780542	1.73754e-06
chr21:21921732:A:G	21:23294052:A:G	A	G	0.196707	0.808046	0.000228221
chr21:23098763:G:A	21:24471085:G:A	G	A	0.146935	0.849648	0.00310599
chr21:26967805:C:T	21:28340124:C:T	C	T	0.263678	0.733213	0.0302163
chr21:27756506:T:C	21:29128825:T:C	T	C	0.0649904	0.932422	0.00146006
chr21:27998457:T:C	21:29370776:T:C	T	C	0.0675011	0.934518	0.0123512
chr21:27999514:G:A	21:29371833:G:A	G	A	0.595812	0.400512	0.0211327
chr21:32038318:A:G	21:33410631:A:G	A	G	0.268108	0.735234	0.0199684
chr21:32156138:C:T	21:33528450:C:T	C	T	0.539319	0.45292	1.81832e-06
chr21:32870829:T:C	21:34243137:T:C	T	C	0.513195	0.491629	0.0029409
chr21:33573415:T:C	21:34945721:T:C	T	C	0.311005	0.702133	2.34919e-18
chr21:35198707:C:T	21:36571004:C:T	C	T	0.0813668	0.912992	3.9244e-10
chr21:35381018:A:T	21:36753316:A:T	A	T	0.500537	0.516958	5.79105e-26
chr21:35630292:C:A	21:37002590:C:A	C	A	0.782808	0.219838	0.048965
chr21:38359991:A:C	21:39731913:A:C	A	C	0.472644	0.530756	0.0358043
chr21:39348568:C:T	21:40720494:C:T	C	T	0.0832852	0.918598	0.0356589
chr21:39833210:A:G	21:41205137:A:G	A	G	0.112583	0.890431	0.00309012
chr21:41403253:C:T	21:42775180:C:T	C	T	0.908885	0.0849516	2.07556e-11
chr21:41728097:G:A	21:43148257:G:A	G	A	0.298351	0.698154	0.019375
chr21:42799489:C:T	21:44219599:C:T	C	T	0.772909	0.222788	0.00153699
chr21:42811264:T:G	21:44231374:T:G	T	G	0.0782335	0.926232	3.39869e-07
chr21:43265514:A:C	21:44685393:A:C	A	C	0.0603954	0.944471	1.37039e-10
chr21:43329261:G:A	21:44749141:G:A	G	A	0.671276	0.324376	0.0043023
chr21:43337912:G:A	21:44757792:G:A	G	A	0.266853	0.728902	0.00325318
chr21:44723946:C:G	21:46143861:C:G	C	G	0.0687389	0.934566	5.90431e-05
chr21:44997056:A:G	21:46416970:A:G	A	G	0.682812	0.32184	0.00219015
chr21:45892161:T:C	21:47312075:T:C	T	C	0.146257	0.86995	5.80069e-47
chr21:46151261:C:T	21:47571175:C:T	C	T	0.0543328	0.947347	0.0215488
chr22:16692122:C:T	22:17173012:C:T	C	T	0.702368	0.291356	2.24953e-05
chr22:17337917:T:C	22:17818807:T:C	T	C	0.0978618	0.904645	0.00891573
chr22:17431799:T:C	22:17910844:T:C	T	C	0.190438	0.813526	0.00184532
chr22:19171502:C:T	22:19159015:C:T	C	T	0.580879	0.415523	0.0247218
chr22:23890859:C:T	22:24233046:C:T	C	T	0.534008	0.473171	9.3457e-06
chr22:25750462:T:G	22:26146429:T:G	T	G	0.298676	0.69749	0.0100671
chr22:26634987:G:T	22:27030951:G:T	G	T	0.525249	0.470902	0.0175469
chr22:26736587:C:T	22:27132550:C:T	C	T	0.14504	0.858152	0.00513593
chr22:26999974:A:G	22:27395937:A:G	A	G	0.424342	0.579167	0.02861
chr22:27456222:T:C	22:27852183:T:C	T	C	0.09385	0.908092	0.0390341
chr22:29491197:G:C	22:29887186:G:C	G	C	0.662085	0.330719	2.84069e-06
chr22:30866918:C:T	22:31262905:C:T	C	T	0.0636075	0.933598	0.000496867
chr22:35012134:A:G	22:35408124:A:G	A	G	0.0632396	0.938995	0.00460436
chr22:36230909:A:G	22:36626955:A:G	A	G	0.219863	0.783602	0.00970469
chr22:38821996:G:A	22:39218001:G:A	G	A	0.16437	0.840265	0.000114353
chr22:38996245:G:A	22:39392250:G:A	G	A	0.223639	0.773138	0.0177822
chr22:43318249:C:T	22:43714255:C:T	C	T	0.194876	0.802393	0.0344106
chr22:45119094:C:T	22:45514975:C:T	C	T	0.333921	0.676923	1.4946e-12
chr22:46380140:G:A	22:46776037:G:A	G	A	0.0823152	0.920012	0.00860892
chr22:46728747:A:T	22:47124644:A:T	A	T	0.0763943	0.928597	4.53356e-09
chr22:48086709:G:C	22:48482526:G:C	G	C	0.919389	0.0837218	0.00053391
chr22:48357021:G:A	22:48752833:G:A	G	A	0.0788752	0.917344	2.26132e-05
chr22:48696429:C:G	22:49092241:C:G	C	G	0.26713	0.736302	0.0166817
chr22:49198217:C:A	22:49594143:C:A	C	A	0.054778	0.947223	0.00623571
chr22:49203234:A:G	22:49599160:A:G	A	G	0.882848	0.119385	0.0335292
chr22:49279742:A:G	22:49675668:A:G	A	G	0.148223	0.856337	6.89887e-05
chr22:49904240:T:C	22:50297888:T:C	T	C	0.0914317	0.917237	4.09071e-21
chr22:49963045:T:C	22:50356693:T:C	T	C	0.764846	0.238416	0.0184517
chr22:50162890:T:G	22:50601319:T:G	T	G	0.887223	0.115747	0.00440546
chr22:50182839:A:G	22:50621268:A:G	A	G	0.542036	0.463134	0.00142865
chr22:50204348:C:T	22:50642777:C:T	C	T	0.564011	0.432283	0.0213551
chr22:50271528:A:C	22:50709957:A:C	A	C	0.0726703	0.93064	7.47283e-05
chr22:50493057:T:C	22:50931486:T:C	T	C	0.112838	0.891397	3.65831e-05
chr3:102005079:A:C	3:101723923:A:C	A	C	0.16863	0.833847	0.040612
chr3:103766983:A:T	3:103485827:A:T	A	T	0.0684385	0.913756	1.5389e-92
chr3:10504650:T:G	3:10546334:T:G	T	G	0.169149	0.834375	0.00375115
chr3:105520057:T:C	3:105238901:T:C	T	C	0.409339	0.603118	6.82209e-15
chr3:10558767:C:T	3:10600451:C:T	C	T	0.165829	0.837741	0.0030979
chr3:107893934:G:A	3:107612781:G:A	G	A	0.0908891	0.907176	0.0401746
chr3:108215610:A:G	3:107934457:A:G	A	G	0.0925839	0.911321	2.85936e-05
chr3:10834351:T:G	3:10876036:T:G	T	G	0.218631	0.786023	0.000680853
chr3:10919389:C:G	3:10961074:C:G	C	G	0.0747163	0.927462	0.00999328
chr3:111987519:G:A	3:111706366:G:A	G	A	0.212568	0.783604	0.00433478
chr3:112126674:C:A	3:111845521:C:A	C	A	0.254862	0.740027	0.000337969
chr3:113622160:T:C	3:113341007:T:C	T	C	0.308792	0.686123	0.000757909
chr3:115574247:T:A	3:115293094:T:A	T	A	0.13615	0.868349	5.28102e-05
chr3:116801534:C:T	3:116520381:C:T	C	T	0.240731	0.771024	2.59552e-17
chr3:116950316:C:T	3:116669163:C:T	C	T	0.217182	0.786415	0.00713454
chr3:119344952:G:A	3:119063799:G:A	G	A	0.111714	0.892822	8.97248e-06
chr3:119552344:A:C	3:119271191:A:C	A	C	0.0725183	0.936769	6.96423e-30
chr3:122997528:G:A	3:122716375:G:A	G	A	0.061757	0.936559	0.0322929
chr3:123329396:C:T	3:123048243:C:T	C	T	0.138109	0.85828	0.00136333
chr3:125862537:T:A	3:125581380:T:A	T	A	0.128892	0.875503	4.61096e-05
chr3:126304379:A:T	3:126023222:A:T	A	T	0.0803431	0.917569	0.0195288
chr3:126635702:T:C	3:126354545:T:C	T	C	0.0683799	0.936072	3.45234e-08
chr3:127102567:T:C	3:126821410:T:C	T	C	0.0672389	0.934775	0.0129986
chr3:127143478:G:A	3:126862321:G:A	G	A	0.189418	0.802014	3.61214e-11
chr3:127406746:C:T	3:127125589:C:T	C	T	0.294853	0.697325	1.61041e-07
chr3:127743651:G:A	3:127462494:G:A	G	A	0.150107	0.852446	0.0274915
chr3:127777711:G:A	3:127496554:G:A	G	A	0.0877965	0.910389	0.0488215
chr3:128481616:T:C	3:128200459:T:C	T	C	0.697812	0.305268	0.0387137
chr3:128780367:G:A	3:128499210:G:A	G	A	0.096214	0.905921	0.0246956
chr3:129575613:C:T	3:129294456:C:T	C	T	0.192937	0.802924	0.00135114
chr3:132706085:C:T	3:132424929:C:T	C	T	0.0632545	0.944657	1.11089e-24
chr3:133989260:C:A	3:133708104:C:A	C	A	0.216297	0.77844	9.05586e-05
chr3:137152399:T:C	3:136871241:T:C	T	C	0.190506	0.812996	0.00575183
chr3:1384298:C:T	3:1425982:C:T	C	T	0.172569	0.822839	0.000224689
chr3:138436113:T:A	3:138154955:T:A	T	A	0.0548202	0.936071	1.0012e-32
chr3:139851662:C:T	3:139570504:C:T	C	T	0.459625	0.551004	5.36526e-11
chr3:139979485:G:A	3:139698327:G:A	G	A	0.059533	0.942994	0.000878659
chr3:140120158:T:C	3:139839000:T:C	T	C	0.716719	0.288521	0.000367851
chr3:140833820:G:A	3:140552662:G:A	G	A	0.82389	0.178746	0.0330945
chr3:141684021:GGTT:G	3:141402863:GGTT:G	GGTT	G	0.110288	0.887109	0.0109147
chr3:142163265:A:G	3:141882107:A:G	A	G	0.0548248	0.947002	0.0132489
chr3:145433849:A:T	3:145151636:A:T	A	T	0.89179	0.0923021	3.62453e-60
chr3:147677404:C:T	3:147395191:C:T	C	T	0.110214	0.885285	1.36708e-05
chr3:147693737:T:C	3:147411524:T:C	T	C	0.814626	0.190924	1.40993e-05
chr3:147713617:G:A	3:147431404:G:A	G	A	0.054295	0.947493	0.0140798
chr3:147966098:A:G	3:147683885:A:G	A	G	0.139354	0.864313	0.00103551
chr3:148218488:C:T	3:147936275:C:T	C	T	0.158968	0.835668	7.96377e-06
chr3:148244768:T:A	3:147962555:T:A	T	A	0.740523	0.256372	0.0289214
chr3:149190208:A:G	3:148907995:A:G	A	G	0.063248	0.938345	0.0425497
chr3:151191920:A:C	3:150909707:A:C	A	C	0.93791	0.0600835	0.00978633
chr3:151888193:T:C	3:151605981:T:C	T	C	0.0541668	0.947626	0.0143736
chr3:152603614:G:T	3:152321403:G:T	G	T	0.282497	0.713185	0.00326211
chr3:158139642:T:G	3:157857431:T:G	T	G	0.0821638	0.919715	0.0348832
chr3:158321575:T:A	3:158039364:T:A	T	A	0.938757	0.0542027	1.56584e-20
chr3:158947851:C:T	3:158665640:C:T	C	T	0.127137	0.868761	0.000172104
chr3:161072137:G:A	3:160789925:G:A	G	A	0.175509	0.78337	5.16705e-214
chr3:16199726:G:T	3:16241233:G:T	G	T	0.146941	0.84674	6.36862e-08
chr3:164216575:A:G	3:163934363:A:G	A	G	0.231895	0.771896	0.00575203
chr3:16493722:C:T	3:16535229:C:T	C	T	0.385818	0.618884	0.00288871
chr3:165256378:T:G	3:164974166:T:G	T	G	0.456185	0.550582	3.07595e-05
chr3:169546619:T:C	3:169264407:T:C	T	C	0.0554492	0.946005	0.0480724
chr3:171502062:C:T	3:171219851:C:T	C	T	0.779178	0.217173	0.00668485
chr3:172177695:A:T	3:171895485:A:T	A	T	0.398735	0.608331	8.86534e-06
chr3:172469088:G:A	3:172186878:G:A	G	A	0.172169	0.83508	4.09669e-09
chr3:172567447:G:A	3:172285237:G:A	G	A	0.199551	0.797445	0.0215388
chr3:172650911:G:A	3:172368701:G:A	G	A	0.443107	0.561277	0.00646208
chr3:172855535:G:A	3:172573325:G:A	G	A	0.208651	0.788424	0.0273676
chr3:174002750:A:G	3:173720540:A:G	A	G	0.183056	0.819896	0.0194412
chr3:174308073:C:T	3:174025863:C:T	C	T	0.193846	0.809433	0.0104784
chr3:174851366:A:G	3:174569156:A:G	A	G	0.173777	0.776762	1.92255187203464e-314
chr3:175964166:C:T	3:175681954:C:T	C	T	0.235062	0.762173	0.0453247
chr3:176073646:G:A	3:175791434:G:A	G	A	0.151004	0.844388	9.05663e-05
chr3:177471787:G:A	3:177189575:G:A	G	A	0.24149	0.751198	1.88249e-07
chr3:179022634:T:A	3:178740422:T:A	T	A	0.715767	0.277294	1.89866e-06
chr3:179260056:G:C	3:178977844:G:C	G	C	0.8239	0.171564	0.000225209
chr3:1807931:T:C	3:1849615:T:C	T	C	0.464379	0.540441	0.00286763
chr3:181824828:C:T	3:181542616:C:T	C	T	0.0566809	0.945761	0.00111873
chr3:183328521:A:G	3:183046309:A:G	A	G	0.130703	0.872698	0.00185248
chr3:183402883:C:A	3:183120671:C:A	C	A	0.362144	0.634448	0.0290831
chr3:184398820:C:T	3:184116608:C:T	C	T	0.110884	0.886933	0.0339977
chr3:184410667:C:T	3:184128455:C:T	C	T	0.254618	0.757351	2.78072e-17
chr3:184629820:A:G	3:184347608:A:G	A	G	0.66663	0.337319	0.0101793
chr3:185084194:C:A	3:184801982:C:A	C	A	0.69835	0.294642	2.3884e-06
chr3:186355693:T:C	3:186073482:T:C	T	C	0.517472	0.487497	0.00214205
chr3:1863714:T:C	3:1905398:T:C	T	C	0.137923	0.865246	0.0046175
chr3:186963223:T:A	3:186681011:T:A	T	A	0.055078	0.94316	0.0181416
chr3:189755484:C:T	3:189473273:C:T	C	T	0.150948	0.84186	1.29706e-09
chr3:189980572:G:A	3:189698361:G:A	G	A	0.239591	0.74402	9.75247e-31
chr3:190686505:G:A	3:190404294:G:A	G	A	0.0831022	0.919427	0.00453971
chr3:190782517:C:A	3:190500306:C:A	C	A	0.477441	0.518873	0.0230078
chr3:190818988:C:A	3:190536777:C:A	C	A	0.184715	0.821269	1.95681e-06
chr3:191977214:G:A	3:191695003:G:A	G	A	0.809293	0.185857	0.000128157
chr3:192362247:T:A	3:192080036:T:A	T	A	0.0832531	0.91344	0.000250675
chr3:192365937:G:A	3:192083726:G:A	G	A	0.0711565	0.932181	6.18947e-05
chr3:193646065:A:G	3:193363854:A:G	A	G	0.220399	0.789721	5.5336e-14
chr3:193650903:C:A	3:193368692:C:A	C	A	0.416712	0.587173	0.0151348
chr3:193651735:T:A	3:193369524:T:A	T	A	0.417605	0.589485	9.8458e-06
chr3:193676706:T:C	3:193394495:T:C	T	C	0.485683	0.522267	1.02556e-06
chr3:193705735:T:G	3:193423524:T:G	T	G	0.0685667	0.934122	0.000926219
chr3:194300942:C:T	3:194018731:C:T	C	T	0.0925339	0.905418	0.0306575
chr3:194830384:G:T	3:194551113:G:T	G	T	0.0752933	0.926974	0.00805506
chr3:195094486:C:T	3:194815215:C:T	C	T	0.151995	0.842451	2.59939e-06
chr3:196729042:C:T	3:196455913:C:T	C	T	0.726865	0.276786	0.0115956
chr3:197220652:T:C	3:196947523:T:C	T	C	0.757989	0.246554	0.00116444
chr3:20190296:C:T	3:20231788:C:T	C	T	0.341141	0.67302	4.22728e-20
chr3:21546075:G:T	3:21587567:G:T	G	T	0.355688	0.64057	0.0161716
chr3:22008754:G:T	3:22050246:G:T	G	T	0.17045	0.835511	1.00445e-06
chr3:2381295:T:C	3:2422979:T:C	T	C	0.945243	0.051552	1.3035e-05
chr3:23896298:G:A	3:23937789:G:A	G	A	0.206103	0.801961	8.04687e-10
chr3:24821603:T:G	3:24863094:T:G	T	G	0.888615	0.113585	0.0325729
chr3:25171387:A:C	3:25212878:A:C	A	C	0.31267	0.695119	2.23322e-07
chr3:2532886:A:G	3:2574570:A:G	A	G	0.736304	0.267042	0.0197353
chr3:2860808:A:G	3:2902492:A:G	A	G	0.215565	0.788289	0.00379279
chr3:31632673:T:G	3:31674165:T:G	T	G	0.0875564	0.914433	0.0296588
chr3:31827313:A:G	3:31868805:A:G	A	G	0.243007	0.759845	0.0400592
chr3:31923815:A:T	3:31965307:A:T	A	T	0.745036	0.250762	0.00290361
chr3:32201691:A:G	3:32243183:A:G	A	G	0.088805	0.914208	0.00100218
chr3:32360501:C:T	3:32401993:C:T	C	T	0.275862	0.719609	0.00189175
chr3:35617986:A:G	3:35659478:A:G	A	G	0.699435	0.307072	1.52774e-05
chr3:3906071:AC:A	3:3947755:AC:A	AC	A	0.134142	0.859806	5.36185e-08
chr3:39198524:C:T	3:39240015:C:T	C	T	0.10871	0.888678	0.010229
chr3:39501936:G:T	3:39543427:G:T	G	T	0.152213	0.844593	0.00654411
chr3:39547507:G:A	3:39588998:G:A	G	A	0.207	0.788881	0.00184445
chr3:39780426:C:G	3:39821917:C:G	C	G	0.171614	0.833342	4.99407e-05
chr3:42128856:G:A	3:42170348:G:A	G	A	0.375034	0.496851	0
chr3:42160563:G:T	3:42202055:G:T	G	T	0.191906	0.812518	0.000530249
chr3:42666621:C:T	3:42708113:C:T	C	T	0.0864917	0.910842	0.00393492
chr3:45570474:T:G	3:45611966:T:G	T	G	0.110852	0.893142	8.67009e-05
chr3:4711494:C:T	3:4753178:C:T	C	T	0.146387	0.857421	0.000884789
chr3:49714152:C:T	3:49751585:C:T	C	T	0.273691	0.722822	0.0162628
chr3:49799274:G:A	3:49836707:G:A	G	A	0.230237	0.763284	2.63453e-06
chr3:535503:T:C	3:577186:T:C	T	C	0.063741	0.93871	0.00181803
chr3:5430771:T:C	3:5472457:T:C	T	C	0.0938069	0.908217	0.0312433
chr3:56886881:G:A	3:56920909:G:A	G	A	0.332587	0.662397	0.00111252
chr3:58342238:T:C	3:58327965:T:C	T	C	0.0651833	0.937421	0.00101984
chr3:61324654:G:T	3:61310328:G:T	G	T	0.124901	0.879476	4.43199e-05
chr3:65746326:G:A	3:65732001:G:A	G	A	0.118232	0.879354	0.0223527
chr3:6675265:C:A	3:6716952:C:A	C	A	0.642705	0.360469	0.0420684
chr3:66878420:A:C	3:66928844:A:C	A	C	0.186144	0.818364	0.000350591
chr3:68134095:A:G	3:68183245:A:G	A	G	0.119522	0.878367	0.0466696
chr3:70163362:G:T	3:70212513:G:T	G	T	0.130134	0.873888	0.000217431
chr3:70347431:C:T	3:70396582:C:T	C	T	0.0683959	0.93326	0.0431047
chr3:72337089:G:C	3:72386240:G:C	G	C	0.624138	0.371864	0.0108579
chr3:73886855:G:A	3:73936006:G:A	G	A	0.459473	0.535746	0.00311242
chr3:7442964:C:A	3:7484651:C:A	C	A	0.741067	0.261969	0.0327066
chr3:75787707:A:G	3:75836858:A:G	A	G	0.160339	0.847209	1.63057e-10
chr3:76056517:A:C	3:76105668:A:C	A	C	0.555232	0.435243	3.674e-09
chr3:78434252:A:C	3:78483402:A:C	A	C	0.346788	0.647687	0.000381296
chr3:78725948:T:C	3:78775098:T:C	T	C	0.230601	0.778556	2.05604e-11
chr3:79308239:A:G	3:79357389:A:G	A	G	0.0743945	0.92843	0.000829168
chr3:81335016:A:T	3:81384167:A:T	A	T	0.203515	0.805472	6.17522e-12
chr3:82519460:C:G	3:82568611:C:G	C	G	0.122325	0.879943	0.0320932
chr3:86825091:G:A	3:86874241:G:A	G	A	0.673784	0.322803	0.0250948
chr3:88325505:A:C	3:88374655:A:C	A	C	0.512585	0.483314	0.0112886
chr3:98507696:C:T	3:98226540:C:T	C	T	0.19149	0.803854	0.000325915
chr3:98786685:T:G	3:98505529:T:G	T	G	0.353982	0.627719	2.71489e-31
chr3:99007688:A:C	3:98726532:A:C	A	C	0.641036	0.371228	6.80858e-15
chr3:99007844:A:G	3:98726688:A:G	A	G	0.647311	0.356306	0.0197982
chr4:10029539:A:T	4:10031163:A:T	A	T	0.833923	0.162817	0.00666311
chr4:100880155:A:G	4:101801312:A:G	A	G	0.207947	0.779447	4.68178e-21
chr4:10144869:G:A	4:10146493:G:A	G	A	0.197817	0.806291	0.00145432
chr4:102253164:C:T	4:103174321:C:T	C	T	0.565276	0.442266	3.32577e-06
chr4:108321596:G:A	4:109242752:G:A	G	A	0.900324	0.0964619	0.000876334
chr4:108855230:A:C	4:109776386:A:C	A	C	0.0918948	0.910591	0.00792296
chr4:112764648:C:T	4:113685804:C:T	C	T	0.29206	0.711887	0.00747965
chr4:114341740:G:A	4:115262896:G:A	G	A	0.326879	0.655424	5.30504e-31
chr4:11883167:T:A	4:11884791:T:A	T	A	0.348666	0.655945	0.00285231
chr4:120535615:C:T	4:121456770:C:T	C	T	0.0580331	0.945168	1.84988e-05
chr4:12064985:C:G	4:12066609:C:G	C	G	0.492569	0.511849	0.00645207
chr4:120723617:G:A	4:121644772:G:A	G	A	0.103303	0.905352	5.57332e-19
chr4:124051931:G:C	4:124973086:G:C	G	C	0.0884156	0.907673	3.07171e-05
chr4:126635147:C:T	4:127556302:C:T	C	T	0.0666075	0.935238	0.0225144
chr4:12679234:C:T	4:12680858:C:T	C	T	0.0555207	0.946127	0.0261436
chr4:127829930:A:G	4:128751085:A:G	A	G	0.0724566	0.917784	2.73178e-29
chr4:130093901:A:C	4:131015056:A:C	A	C	0.0828268	0.921938	6.22967e-08
chr4:131928716:G:A	4:132849871:G:A	G	A	0.0951721	0.913027	1.88425e-18
chr4:133218495:T:C	4:134139650:T:C	T	C	0.859834	0.137951	0.0480327
chr4:134885279:G:T	4:135806434:G:T	G	T	0.578576	0.417453	0.013141
chr4:137460675:G:T	4:138381829:G:T	G	T	0.0916799	0.91015	0.0496312
chr4:138792543:A:C	4:139713697:A:C	A	C	0.164447	0.832587	0.0143867
chr4:139704951:A:G	4:140626105:A:G	A	G	0.869372	0.128133	0.02201
chr4:139716549:G:A	4:140637703:G:A	G	A	0.168994	0.838334	1.72229e-09
chr4:141895959:A:G	4:142817112:A:G	A	G	0.777322	0.226746	0.00278194
chr4:144123033:A:G	4:145044186:A:G	A	G	0.0938922	0.908287	0.0205695
chr4:144171704:T:C	4:145092857:T:C	T	C	0.803482	0.192497	0.00171397
chr4:144314175:C:G	4:145235327:C:G	C	G	0.216854	0.786889	0.00516202
chr4:145617075:T:C	4:146538227:T:C	T	C	0.0861569	0.915961	0.0193392
chr4:145672419:T:G	4:146593571:T:G	T	G	0.213432	0.79198	4.61657e-05
chr4:145750194:T:C	4:146671346:T:C	T	C	0.0850961	0.91252	0.00920381
chr4:146233822:C:T	4:147154974:C:T	C	T	0.126971	0.870448	0.0178787
chr4:148418515:C:T	4:149339667:C:T	C	T	0.218255	0.766982	3.12741e-27
chr4:14903778:T:C	4:14905402:T:C	T	C	0.360456	0.643341	0.0147728
chr4:150181625:A:T	4:151102777:A:T	A	T	0.900856	0.0948008	5.78668e-06
chr4:151373577:A:G	4:152294729:A:G	A	G	0.12312	0.879612	0.00999585
chr4:151550916:C:T	4:152472068:C:T	C	T	0.109965	0.895565	3.33193e-08
chr4:153143317:A:G	4:154064469:A:G	A	G	0.098347	0.903652	0.037395
chr4:154041406:A:G	4:154962558:A:G	A	G	0.275885	0.720478	0.0126385
chr4:1551530:T:C	4:1553257:T:C	T	C	0.754059	0.252767	1.44276e-06
chr4:15600629:G:C	4:15602252:G:C	G	C	0.349904	0.64674	0.0304803
chr4:1578002:T:C	4:1579729:T:C	T	C	0.774205	0.228724	0.0324751
chr4:159438482:T:A	4:160359634:T:A	T	A	0.190442	0.814222	0.000236437
chr4:1595244:A:G	4:1596971:A:G	A	G	0.408507	0.597511	0.000169689
chr4:15963047:C:T	4:15964670:C:T	C	T	0.130473	0.865058	5.58779e-05
chr4:160365992:T:G	4:161287144:T:G	T	G	0.265024	0.7381	0.0289985
chr4:161120660:A:T	4:162041812:A:T	A	T	0.233662	0.773981	2.58894e-08
chr4:161292105:C:T	4:162213257:C:T	C	T	0.0925891	0.904847	0.00724649
chr4:16179828:A:G	4:16181451:A:G	A	G	0.0565923	0.929891	4.8438e-65
chr4:16439790:C:T	4:16441413:C:T	C	T	0.187768	0.808721	0.00597675
chr4:164805246:T:C	4:165726398:T:C	T	C	0.0590518	0.944234	1.26503e-05
chr4:165320466:C:T	4:166241618:C:T	C	T	0.094462	0.90924	8.34168e-05
chr4:165799958:C:T	4:166721110:C:T	C	T	0.147594	0.849934	0.0334432
chr4:166106161:C:A	4:167027313:C:A	C	A	0.064374	0.933146	0.00221849
chr4:169069341:T:C	4:169990492:T:C	T	C	0.325266	0.681293	1.57927e-05
chr4:173778488:C:G	4:174699639:C:G	C	G	0.128671	0.875119	0.00045256
chr4:174214345:G:T	4:175135496:G:T	G	T	0.361887	0.628177	2.4849e-10
chr4:174229367:T:A	4:175150518:T:A	T	A	0.0780408	0.925717	1.24902e-05
chr4:174758444:G:A	4:175679595:G:A	G	A	0.0536609	0.944469	0.0117735
chr4:175965616:T:C	4:176886767:T:C	T	C	0.109256	0.87726	5.89387e-38
chr4:176312131:C:A	4:177233282:C:A	C	A	0.147003	0.856499	0.00228084
chr4:178794434:C:T	4:179715588:C:T	C	T	0.30134	0.701792	0.0369982
chr4:180604950:T:G	4:181526103:T:G	T	G	0.113884	0.888959	0.00582281
chr4:180626913:G:T	4:181548066:G:T	G	T	0.568543	0.43594	0.00535691
chr4:180932829:C:T	4:181853982:C:T	C	T	0.0539398	0.947844	0.0140876
chr4:182092830:A:G	4:183013983:A:G	A	G	0.364103	0.639453	0.022947
chr4:182761603:C:T	4:183682756:C:T	C	T	0.517366	0.371646	0
chr4:182826090:C:T	4:183747243:C:T	C	T	0.144979	0.852386	0.0221083
chr4:182897942:T:C	4:183819095:T:C	T	C	0.261215	0.743248	0.00172824
chr4:183649562:T:G	4:184570715:T:G	T	G	0.245662	0.76293	7.72698e-10
chr4:183662077:A:G	4:184583230:A:G	A	G	0.188641	0.814686	0.00849726
chr4:186014610:A:G	4:186935764:A:G	A	G	0.122352	0.875248	0.0256375
chr4:186262526:T:C	4:187183680:T:C	T	C	0.614599	0.389379	0.0117204
chr4:186456853:T:C	4:187378007:T:C	T	C	0.535489	0.472389	1.19102e-06
chr4:186485282:T:C	4:187406436:T:C	T	C	0.36682	0.642909	5.02418e-10
chr4:186485747:G:A	4:187406901:G:A	G	A	0.233004	0.769816	0.0391627
chr4:188420198:T:C	4:189341352:T:C	T	C	0.135259	0.86105	0.00102086
chr4:188623614:G:T	4:189544768:G:T	G	T	0.583327	0.413435	0.0428097
chr4:20497789:G:C	4:20499412:G:C	G	C	0.714414	0.290114	0.00212381
chr4:21492232:G:T	4:21493855:G:T	G	T	0.335839	0.65501	3.97431e-09
chr4:2334928:T:C	4:2336655:T:C	T	C	0.328657	0.676431	0.000841176
chr4:23757639:G:A	4:23759262:G:A	G	A	0.643711	0.361525	0.000766289
chr4:25556943:T:A	4:25558565:T:A	T	A	0.92426	0.0739389	0.0344364
chr4:25620389:T:C	4:25622011:T:C	T	C	0.147238	0.855855	0.00711005
chr4:25945462:T:A	4:25947084:T:A	T	A	0.595714	0.38921	3.01574e-21
chr4:2795756:C:T	4:2797483:C:T	C	T	0.154123	0.842798	0.00912113
chr4:28015754:G:A	4:28017376:G:A	G	A	0.0892002	0.903513	1.11345e-14
chr4:29733863:C:T	4:29735485:C:T	C	T	0.497029	0.495128	1.47997e-06
chr4:30365462:G:A	4:30367084:G:A	G	A	0.0601965	0.942734	0.000127929
chr4:31876247:A:C	4:31877869:A:C	A	C	0.281526	0.722143	0.0118537
chr4:31970946:T:C	4:31972568:T:C	T	C	0.0593824	0.943428	0.000246403
chr4:32428364:G:T	4:32429986:G:T	G	T	0.245621	0.758073	0.00812279
chr4:35116864:G:A	4:35118486:G:A	G	A	0.172954	0.830234	0.00917445
chr4:35533108:A:G	4:35534730:A:G	A	G	0.17582	0.8346	2.69143e-17
chr4:3603176:G:A	4:3604903:G:A	G	A	0.137637	0.864676	0.0385593
chr4:3611437:C:T	4:3613164:C:T	C	T	0.455563	0.539572	0.00279208
chr4:3631932:A:G	4:3633659:A:G	A	G	0.107503	0.901046	5.45432e-18
chr4:38935212:G:A	4:38936833:G:A	G	A	0.45334	0.543165	0.0307239
chr4:39598859:C:T	4:39600479:C:T	C	T	0.0701065	0.927166	0.00122739
chr4:39839699:C:T	4:39841319:C:T	C	T	0.0578505	0.94466	0.000897989
chr4:40179763:T:C	4:40181383:T:C	T	C	0.162537	0.81582	3.11727e-68
chr4:40275726:G:A	4:40277346:G:A	G	A	0.0998588	0.903084	0.00243511
chr4:40938914:G:A	4:40940931:G:A	G	A	0.180434	0.816406	0.0117633
chr4:4226335:G:T	4:4228062:G:T	G	T	0.141529	0.866837	8.53996e-14
chr4:42391295:T:C	4:42393312:T:C	T	C	0.398012	0.609621	1.84532e-06
chr4:48437076:T:C	4:48439093:T:C	T	C	0.289644	0.717772	4.6575e-07
chr4:52260551:T:A	4:53126717:T:A	T	A	0.309192	0.687273	0.0185882
chr4:52675732:C:T	4:53541899:C:T	C	T	0.125775	0.877264	0.00451993
chr4:53146157:T:C	4:54012324:T:C	T	C	0.443581	0.559662	0.0448487
chr4:53584164:T:C	4:54450331:T:C	T	C	0.29639	0.710514	3.13866e-06
chr4:5640026:T:G	4:5641753:T:G	T	G	0.518989	0.486736	0.000420851
chr4:5726297:A:G	4:5728024:A:G	A	G	0.0648792	0.938884	1.83299e-06
chr4:60933967:C:T	4:61799685:C:T	C	T	0.127169	0.876442	0.000849436
chr4:60961311:A:C	4:61827029:A:C	A	C	0.776775	0.230712	4.33159e-08
chr4:62358268:C:T	4:63223986:C:T	C	T	0.623815	0.371725	0.00440371
chr4:64363015:A:G	4:65228733:A:G	A	G	0.23592	0.767177	0.0244599
chr4:65091568:C:G	4:65957286:C:G	C	G	0.0593035	0.944976	1.59466e-08
chr4:65846634:A:C	4:66712352:A:C	A	C	0.109891	0.885972	5.21504e-05
chr4:6691022:T:C	4:6692749:T:C	T	C	0.199679	0.803837	0.00668569
chr4:67618045:C:A	4:68483763:C:A	C	A	0.384935	0.606877	2.77829e-07
chr4:70574406:T:A	4:71440123:T:A	T	A	0.441413	0.562955	0.00664305
chr4:72875653:T:A	4:73741370:T:A	T	A	0.796235	0.208091	0.00101685
chr4:72973471:C:T	4:73839188:C:T	C	T	0.640276	0.35134	8.47405e-08
chr4:7427826:A:G	4:7429553:A:G	A	G	0.674016	0.332409	2.48935e-05
chr4:76872281:G:A	4:77793434:G:A	G	A	0.0851161	0.9119	0.00117099
chr4:782219:T:C	4:776007:T:C	T	C	0.0612881	0.94134	0.000645883
chr4:791091:G:A	4:784879:G:A	G	A	0.0712496	0.932467	8.60851e-06
chr4:81219847:A:G	4:82141001:A:G	A	G	0.0865612	0.910007	0.000216938
chr4:81236130:T:C	4:82157284:T:C	T	C	0.242	0.77124	1.58152e-21
chr4:81418147:T:C	4:82339301:T:C	T	C	0.0554178	0.94606	0.044667
chr4:82394468:G:C	4:83315621:G:C	G	C	0.0922243	0.905386	0.0119114
chr4:8527178:G:A	4:8528905:G:A	G	A	0.119043	0.887022	1.26183e-08
chr4:90994485:A:G	4:91915636:A:G	A	G	0.056861	0.945009	0.0127309
chr4:91502721:A:C	4:92423872:A:C	A	C	0.116334	0.88763	0.000122296
chr4:95601398:G:C	4:96522549:G:C	G	C	0.829341	0.174031	0.00637764
chr4:96884360:A:G	4:97805511:A:G	A	G	0.367914	0.636375	0.00615837
chr4:96988318:T:C	4:97909469:T:C	T	C	0.13896	0.863439	0.0320225
chr4:97108061:C:T	4:98029212:C:T	C	T	0.201503	0.806268	1.6283e-09
chr4:99315605:C:T	4:100236762:C:T	C	T	0.809594	0.185761	0.000246502
chr5:102234532:T:C	5:101570236:T:C	T	C	0.0824667	0.9197	0.0146599
chr5:105530303:T:G	5:104866004:T:G	T	G	0.940499	0.0564917	7.20671e-05
chr5:107609990:G:C	5:106945691:G:C	G	C	0.563682	0.439511	0.0471152
chr5:107736258:G:C	5:107071959:G:C	G	C	0.103498	0.899008	0.0107974
chr5:109082971:C:A	5:108418672:C:A	C	A	0.207475	0.787109	4.04551e-05
chr5:109958314:C:G	5:109294015:C:G	C	G	0.0629426	0.938995	0.013216
chr5:112344704:A:G	5:111680401:A:G	A	G	0.905906	0.090553	0.00016885
chr5:112692738:A:C	5:112028435:A:C	A	C	0.117222	0.876287	1.31472e-09
chr5:115406814:G:T	5:114742511:G:T	G	T	0.115728	0.881985	0.0289794
chr5:117272743:C:T	5:116608439:C:T	C	T	0.120604	0.871523	2.1476e-13
chr5:117335463:G:T	5:116671159:G:T	G	T	0.11786	0.886593	1.7852e-05
chr5:121916357:T:C	5:121252052:T:C	T	C	0.729136	0.265625	0.000258313
chr5:122445592:G:T	5:121781287:G:T	G	T	0.0532007	0.94867	0.0102384
chr5:123235799:G:A	5:122571493:G:A	G	A	0.237278	0.76986	2.31308e-07
chr5:123349434:A:G	5:122685128:A:G	A	G	0.404828	0.599182	0.0122771
chr5:124620115:G:C	5:123955808:G:C	G	C	0.0776197	0.925915	4.59186e-05
chr5:125507966:A:G	5:124843659:A:G	A	G	0.771049	0.232606	0.00739769
chr5:126237036:C:T	5:125572729:C:T	C	T	0.538801	0.411002	1.32966e-212
chr5:131529486:T:A	5:130865179:T:A	T	A	0.641907	0.361618	0.0234803
chr5:134513486:C:G	5:133849177:C:G	C	G	0.192113	0.812289	0.00056753
chr5:137112852:G:A	5:136448541:G:A	G	A	0.415596	0.581139	0.0431013
chr5:13726908:C:T	5:13727017:C:T	C	T	0.588098	0.405183	2.64751e-05
chr5:14033161:A:G	5:14033270:A:G	A	G	0.378613	0.625007	0.0214294
chr5:140757226:G:A	5:140136811:G:A	G	A	0.427524	0.568777	0.0214157
chr5:141203704:G:T	5:140583277:G:T	G	T	0.0586143	0.945599	2.37543e-08
chr5:14159102:T:G	5:14159211:T:G	T	G	0.27441	0.731295	7.88e-05
chr5:143041450:G:A	5:142421015:G:A	G	A	0.0574113	0.944504	0.0104366
chr5:146738429:C:T	5:146117992:C:T	C	T	0.138002	0.865179	0.00452091
chr5:148931024:T:C	5:148310587:T:C	T	C	0.612324	0.392117	0.00509976
chr5:150338364:A:G	5:149717927:A:G	A	G	0.148704	0.858458	5.33925e-10
chr5:1517527:A:G	5:1517642:A:G	A	G	0.200126	0.803196	0.0103507
chr5:152148366:C:T	5:151527927:C:T	C	T	0.157803	0.839645	0.0324353
chr5:153688729:G:T	5:153068289:G:T	G	T	0.0776423	0.925357	0.000490534
chr5:154522702:T:C	5:153902262:T:C	T	C	0.901124	0.0967733	0.0291268
chr5:157594742:A:C	5:157021750:A:C	A	C	0.145729	0.8387	5.06685e-40
chr5:157628166:A:T	5:157055174:A:T	A	T	0.0982623	0.904572	0.00308482
chr5:159929758:T:A	5:159356765:T:A	T	A	0.0685429	0.928808	0.00149599
chr5:159965845:A:T	5:159392852:A:T	A	T	0.220975	0.783877	0.000290132
chr5:160192819:A:G	5:159619826:A:G	A	G	0.172023	0.830711	0.0255026
chr5:163231324:G:A	5:162658330:G:A	G	A	0.165529	0.837391	0.0152769
chr5:164508423:C:T	5:163935429:C:T	C	T	0.0598592	0.942677	0.000927327
chr5:165497418:G:A	5:164924423:G:A	G	A	0.768843	0.228248	0.0333846
chr5:165616605:G:A	5:165043610:G:A	G	A	0.183756	0.822178	2.30122e-06
chr5:165746824:T:C	5:165173829:T:C	T	C	0.246541	0.767248	4.06428e-22
chr5:166915173:T:G	5:166342178:T:G	T	G	0.411449	0.584902	0.0227895
chr5:167245514:C:T	5:166672519:C:T	C	T	0.930676	0.06532	7.88965e-07
chr5:16773799:A:G	5:16773908:A:G	A	G	0.140098	0.865975	6.74462e-08
chr5:168770639:A:G	5:168197644:A:G	A	G	0.0934256	0.908855	0.0156034
chr5:16912738:G:A	5:16912847:G:A	G	A	0.104013	0.899563	0.000301122
chr5:169257354:T:C	5:168684358:T:C	T	C	0.312671	0.69764	7.73508e-12
chr5:170353753:C:T	5:169780757:C:T	C	T	0.149558	0.845458	2.20853e-05
chr5:170411649:A:G	5:169838653:A:G	A	G	0.653601	0.351786	0.000504207
chr5:171154120:A:T	5:170581124:A:T	A	T	0.0662044	0.93538	0.0490838
chr5:171473286:A:G	5:170900290:A:G	A	G	0.218214	0.784816	0.0232905
chr5:171556795:A:G	5:170983799:A:G	A	G	0.350755	0.65557	4.42379e-05
chr5:172225916:G:T	5:171652920:G:T	G	T	0.405896	0.602884	3.65258e-08
chr5:172229542:T:C	5:171656546:T:C	T	C	0.101643	0.900568	0.024103
chr5:172290709:A:G	5:171717713:A:G	A	G	0.326958	0.679166	5.58547e-05
chr5:172963390:A:T	5:172390393:A:T	A	T	0.0681489	0.934077	0.00649451
chr5:174246346:C:G	5:173673349:C:G	C	G	0.281229	0.728821	5.77343e-12
chr5:178311164:C:G	5:177738165:C:G	C	G	0.0636036	0.938665	0.00404526
chr5:178328276:G:A	5:177755277:G:A	G	A	0.0546007	0.943421	0.00819639
chr5:178535846:G:T	5:177962847:G:T	G	T	0.920499	0.0763484	0.000286771
chr5:179076639:C:T	5:178503640:C:T	C	T	0.284053	0.712935	0.0399271
chr5:179667107:A:C	5:179094108:A:C	A	C	0.179527	0.826707	5.14256e-07
chr5:179839268:C:A	5:179266268:C:A	C	A	0.0645112	0.937166	0.0358714
chr5:179868060:T:C	5:179295060:T:C	T	C	0.138925	0.870431	2.93477e-17
chr5:180367981:T:A	5:179794981:T:A	T	A	0.0675744	0.927924	5.47583e-08
chr5:180453984:A:C	5:179880984:A:C	A	C	0.107012	0.896486	0.000480236
chr5:18087499:T:G	5:18087608:T:G	T	G	0.0839554	0.918001	0.0295376
chr5:20508870:G:T	5:20508979:G:T	G	T	0.478636	0.516519	0.00293969
chr5:2110804:G:A	5:2110918:G:A	G	A	0.227253	0.767788	0.000307053
chr5:2137873:T:C	5:2137987:T:C	T	C	0.0872519	0.918202	2.31799e-09
chr5:21453971:A:C	5:21454080:A:C	A	C	0.138297	0.871972	3.88683e-20
chr5:21529303:A:G	5:21529412:A:G	A	G	0.0647644	0.937849	0.000938909
chr5:21540531:A:G	5:21540640:A:G	A	G	0.366074	0.63789	0.0112756
chr5:22301069:T:C	5:22301178:T:C	T	C	0.348229	0.662565	3.11844e-12
chr5:22760704:A:C	5:22760813:A:C	A	C	0.491781	0.498774	6.96958e-09
chr5:22902368:G:T	5:22902477:G:T	G	T	0.193943	0.808736	0.0363438
chr5:23720246:T:C	5:23720355:T:C	T	C	0.716622	0.286781	0.0213785
chr5:25575450:A:G	5:25575559:A:G	A	G	0.165718	0.840369	3.75971e-07
chr5:27842957:G:T	5:27843064:G:T	G	T	0.0632372	0.939566	0.000332945
chr5:28621186:A:G	5:28621293:A:G	A	G	0.566118	0.442218	2.27109e-07
chr5:29223585:A:C	5:29223692:A:C	A	C	0.247862	0.755511	0.0160531
chr5:31386399:G:T	5:31386506:G:T	G	T	0.178371	0.829949	2.09322e-11
chr5:32462647:C:T	5:32462753:C:T	C	T	0.215486	0.780466	0.00259607
chr5:34389711:G:A	5:34389816:G:A	G	A	0.437613	0.558149	0.00873569
chr5:37243651:C:A	5:37243753:C:A	C	A	0.220537	0.784594	0.000137137
chr5:38143181:C:T	5:38143283:C:T	C	T	0.0765308	0.926432	0.000512145
chr5:3815565:G:T	5:3815679:G:T	G	T	0.509812	0.485729	0.00600085
chr5:39511849:A:G	5:39511951:A:G	A	G	0.297594	0.707144	0.00139071
chr5:4011057:A:G	5:4011171:A:G	A	G	0.295997	0.716973	2.48697e-18
chr5:4223961:T:C	5:4224074:T:C	T	C	0.0576639	0.9446	0.00253766
chr5:42729086:C:T	5:42729188:C:T	C	T	0.0840098	0.918353	0.00837733
chr5:46380224:G:A	5:46380326:G:A	G	A	0.66458	0.32303	6.65702e-16
chr5:5260750:C:T	5:5260863:C:T	C	T	0.145187	0.850738	0.000418783
chr5:52939972:T:G	5:52235802:T:G	T	G	0.870353	0.127092	0.0185768
chr5:5294074:C:T	5:5294187:C:T	C	T	0.101179	0.90081	0.0406715
chr5:53222774:T:C	5:52518604:T:C	T	C	0.329232	0.678101	1.46914e-06
chr5:55482225:C:T	5:54778053:C:T	C	T	0.734538	0.261099	0.00221749
chr5:55538243:A:G	5:54834071:A:G	A	G	0.885171	0.112612	0.0312939
chr5:56882284:A:G	5:56178111:A:G	A	G	0.0785512	0.924347	0.000799768
chr5:59116265:A:G	5:58412092:A:G	A	G	0.169275	0.834083	0.00555909
chr5:59427095:A:T	5:58722921:A:T	A	T	0.0853763	0.917857	0.000357761
chr5:60031661:T:G	5:59327488:T:G	T	G	0.0656834	0.93265	0.0405714
chr5:6021733:A:C	5:6021846:A:C	A	C	0.795498	0.211316	2.69024e-07
chr5:63314081:A:T	5:62609908:A:T	A	T	0.252977	0.758771	2.53086e-16
chr5:64600397:T:A	5:63896224:T:A	T	A	0.10248	0.894178	0.000814524
chr5:65620648:T:C	5:64916475:T:C	T	C	0.0773146	0.924504	0.0356437
chr5:65637359:C:T	5:64933186:C:T	C	T	0.590378	0.401187	1.47315e-07
chr5:66555779:A:T	5:65851607:A:T	A	T	0.0673233	0.929758	0.000437462
chr5:68021286:G:T	5:67317114:G:T	G	T	0.400594	0.60356	0.00872043
chr5:68474576:A:C	5:67770403:A:C	A	C	0.0554179	0.946376	0.0154608
chr5:71659917:A:C	5:70955744:A:C	A	C	0.121076	0.881279	0.0254429
chr5:73849602:A:G	5:73145427:A:G	A	G	0.0597192	0.943789	4.00539e-06
chr5:74679269:G:A	5:73975094:G:A	G	A	0.180425	0.824128	0.000245703
chr5:75925108:C:T	5:75220933:C:T	C	T	0.208179	0.788925	0.028531
chr5:77086872:A:G	5:76382697:A:G	A	G	0.0545164	0.947459	0.00683551
chr5:78636020:G:A	5:77931843:G:A	G	A	0.306211	0.688743	0.00083328
chr5:80201337:T:C	5:79497156:T:C	T	C	0.14177	0.861651	0.00240594
chr5:80354176:T:A	5:79649995:T:A	T	A	0.11756	0.893068	4.32771e-25
chr5:80808884:C:T	5:80104703:C:T	C	T	0.840443	0.155633	0.000943182
chr5:81217249:C:T	5:80513068:C:T	C	T	0.201471	0.795891	0.0440797
chr5:81919597:A:G	5:81215416:A:G	A	G	0.0530157	0.949128	0.00319777
chr5:84241699:C:A	5:83537517:C:A	C	A	0.0953643	0.899511	1.04627e-07
chr5:87769489:G:A	5:87065306:G:A	G	A	0.258642	0.752809	8.88614e-16
chr5:95406133:A:G	5:94741837:A:G	A	G	0.779019	0.225516	0.000819193
chr5:96384655:T:C	5:95720359:T:C	T	C	0.263997	0.739571	0.0126064
chr5:96419328:A:T	5:95755032:A:T	A	T	0.280317	0.702293	2.21886e-31
chr5:96618719:C:A	5:95954423:C:A	C	A	0.828371	0.168745	0.0179136
chr5:97564336:A:G	5:96900040:A:G	A	G	0.101893	0.902788	1.45206e-06
chr5:98048276:T:C	5:97383980:T:C	T	C	0.369945	0.640584	1.92789e-11
chr5:98730558:A:C	5:98066262:A:C	A	C	0.0939747	0.904029	0.0373297
chr5:98916571:G:C	5:98252275:G:C	G	C	0.18615	0.819282	2.16467e-05
chr5:99486209:C:G	5:98821913:C:G	C	G	0.753513	0.241743	0.000679676
chr6:101166891:T:A	6:101614767:T:A	T	A	0.822347	0.173272	0.000392653
chr6:104258704:C:T	6:104706579:C:T	C	T	0.250871	0.752398	0.0198584
chr6:105329971:T:C	6:105777846:T:C	T	C	0.0687622	0.933241	0.0140931
chr6:107007802:T:C	6:107329006:T:C	T	C	0.281877	0.722178	0.005445
chr6:107986042:G:A	6:108307246:G:A	G	A	0.68619	0.310094	0.0134858
chr6:108960208:G:T	6:109281411:G:T	G	T	0.115153	0.878129	1.56234e-10
chr6:11276971:T:A	6:11277204:T:A	T	A	0.0591941	0.942511	0.0256646
chr6:113660528:T:C	6:113981730:T:C	T	C	0.34937	0.635446	4.59944e-22
chr6:114010406:T:C	6:114331570:T:C	T	C	0.56102	0.446136	9.74889e-06
chr6:114160335:T:A	6:114481499:T:A	T	A	0.0671379	0.917677	4.56692e-70
chr6:11473526:G:C	6:11473759:G:C	G	C	0.0575972	0.944732	0.00186391
chr6:118290580:T:C	6:118611743:T:C	T	C	0.0596482	0.942326	0.00957734
chr6:118412159:C:A	6:118733322:C:A	C	A	0.0540835	0.947497	0.0302538
chr6:11863124:A:G	6:11863357:A:G	A	G	0.929843	0.067658	0.00232254
chr6:119998300:T:A	6:120319446:T:A	T	A	0.0674577	0.934882	0.00371836
chr6:12380135:A:C	6:12380367:A:C	A	C	0.573491	0.429838	0.038206
chr6:124931375:T:C	6:125252521:T:C	T	C	0.764974	0.23826	0.0192832
chr6:128727230:G:T	6:129048375:G:T	G	T	0.0685608	0.92975	0.0417567
chr6:131964571:C:T	6:132285711:C:T	C	T	0.636401	0.359135	0.0043657
chr6:132625901:T:C	6:132947040:T:C	T	C	0.0572533	0.94457	0.0155951
chr6:134188116:T:C	6:134509254:T:C	T	C	0.657328	0.338522	0.00689332
chr6:135147172:C:T	6:135468310:C:T	C	T	0.186306	0.817459	0.00297924
chr6:138092132:A:G	6:138413269:A:G	A	G	0.559357	0.443923	0.0423624
chr6:139242518:G:A	6:139563655:G:A	G	A	0.081908	0.915212	0.00149139
chr6:14056017:G:A	6:14056248:G:A	G	A	0.307546	0.703578	1.57706e-13
chr6:14091139:A:C	6:14091370:A:C	A	C	0.526681	0.492867	1.28215e-33
chr6:142454158:A:G	6:142775295:A:G	A	G	0.212492	0.799528	8.32105e-20
chr6:145430606:A:G	6:145751742:A:G	A	G	0.0948094	0.910932	2.92279e-09
chr6:148423272:C:T	6:148744408:C:T	C	T	0.124423	0.8725	0.00463879
chr6:148452691:C:G	6:148773827:C:G	C	G	0.444999	0.560498	0.000649621
chr6:148512271:G:A	6:148833407:G:A	G	A	0.166192	0.830642	0.00938154
chr6:150314279:G:A	6:150635415:G:A	G	A	0.134442	0.862755	0.012224
chr6:150957036:G:A	6:151278172:G:A	G	A	0.277934	0.718024	0.00562833
chr6:151287559:C:T	6:151608694:C:T	C	T	0.340166	0.649374	1.69439e-11
chr6:153436601:C:T	6:153757736:C:T	C	T	0.810463	0.186005	0.00528654
chr6:154713849:T:A	6:155034983:T:A	T	A	0.0552405	0.946779	0.00641844
chr6:155593515:A:G	6:155914649:A:G	A	G	0.150807	0.846535	0.0229831
chr6:155907543:C:T	6:156228677:C:T	C	T	0.0562187	0.942288	0.0492779
chr6:155935852:A:G	6:156256986:A:G	A	G	0.101577	0.901588	0.00122127
chr6:156662722:G:A	6:156983856:G:A	G	A	0.876943	0.119576	0.00100157
chr6:158307471:C:T	6:158728503:C:T	C	T	0.142532	0.854579	0.0116768
chr6:15850667:A:T	6:15850898:A:T	A	T	0.12681	0.875634	0.0228477
chr6:158768540:G:A	6:159189572:G:A	G	A	0.128007	0.86884	0.00411869
chr6:159399661:A:G	6:159820693:A:G	A	G	0.140792	0.861424	0.0491553
chr6:159530798:T:C	6:159951830:T:C	T	C	0.793049	0.214534	1.31156e-08
chr6:161984557:G:T	6:162405589:G:T	G	T	0.300313	0.696384	0.026909
chr6:162575541:T:G	6:162996573:T:G	T	G	0.06531	0.937617	0.000257733
chr6:16284554:C:A	6:16284785:C:A	C	A	0.122692	0.874676	0.014256
chr6:163144250:G:A	6:163565282:G:A	G	A	0.35488	0.636817	1.47381e-07
chr6:163627248:T:G	6:164048280:T:G	T	G	0.248321	0.755714	0.00388299
chr6:163855904:G:A	6:164276936:G:A	G	A	0.0757587	0.926972	0.00136294
chr6:163920203:A:G	6:164341235:A:G	A	G	0.059886	0.942268	0.00477585
chr6:165835580:T:C	6:166249068:T:C	T	C	0.258487	0.747144	7.17849e-05
chr6:166470980:T:C	6:166884468:T:C	T	C	0.497369	0.506684	0.0125377
chr6:166695891:C:G	6:167109379:C:G	C	G	0.0712559	0.931946	0.000106068
chr6:167230789:A:C	6:167644277:A:C	A	C	0.21785	0.790584	3.03558e-10
chr6:167686795:G:A	6:168087475:G:A	G	A	0.796026	0.210375	1.25537e-06
chr6:168024396:G:A	6:168425076:G:A	G	A	0.256006	0.749082	0.000324211
chr6:168050608:C:T	6:168451288:C:T	C	T	0.056248	0.948718	1.5924e-11
chr6:168087569:G:C	6:168488249:G:C	G	C	0.494712	0.510409	0.00165944
chr6:168132771:G:T	6:168533451:G:T	G	T	0.495361	0.500589	0.0133326
chr6:168715360:A:G	6:169115590:A:G	A	G	0.0846335	0.918016	0.00330741
chr6:168910205:C:T	6:169310300:C:T	C	T	0.0734419	0.929773	0.000143374
chr6:169805477:T:C	6:170205573:T:C	T	C	0.102004	0.902913	5.38897e-07
chr6:170177225:G:T	6:170492449:G:T	G	T	0.681968	0.324919	6.1621e-06
chr6:17543715:T:G	6:17543946:T:G	T	G	0.183853	0.819369	0.010178
chr6:17632830:C:T	6:17633061:C:T	C	T	0.772772	0.23043	0.0187345
chr6:18374369:C:T	6:18374600:C:T	C	T	0.271293	0.73615	2.44812e-07
chr6:18772949:T:A	6:18773180:T:A	T	A	0.546465	0.448424	0.00154477
chr6:18894385:T:G	6:18894616:T:G	T	G	0.858329	0.139002	0.0178805
chr6:20751084:T:C	6:20751315:T:C	T	C	0.425184	0.584275	3.93959e-09
chr6:21197170:T:A	6:21197401:T:A	T	A	0.298435	0.707409	8.6293e-05
chr6:21249782:C:T	6:21250013:C:T	C	T	0.0609754	0.937153	0.0176864
chr6:21978450:T:C	6:21978679:T:C	T	C	0.142223	0.861153	0.00288124
chr6:23255418:A:G	6:23255646:A:G	A	G	0.0954219	0.906618	0.0312146
chr6:23313792:A:T	6:23314020:A:T	A	T	0.0862023	0.916189	0.00857044
chr6:23513332:T:C	6:23513560:T:C	T	C	0.238064	0.755556	4.45057e-06
chr6:23876707:A:C	6:23876935:A:C	A	C	0.293795	0.710052	0.00920108
chr6:25332787:A:G	6:25333015:A:G	A	G	0.145476	0.857141	0.0221431
chr6:26436171:G:A	6:26436399:G:A	G	A	0.10257	0.901776	1.01088e-05
chr6:27309272:C:T	6:27277051:C:T	C	T	0.109785	0.892742	0.0121502
chr6:28705624:A:C	6:28673401:A:C	A	C	0.068946	0.933276	0.00676292
chr6:28814986:A:C	6:28782763:A:C	A	C	0.0626576	0.939736	0.00214584
chr6:28915911:T:C	6:28883688:T:C	T	C	0.110467	0.892422	0.00429446
chr6:29624913:C:A	6:29592690:C:A	C	A	0.100706	0.897251	0.0380392
chr6:29625316:T:G	6:29593093:T:G	T	G	0.100651	0.905476	2.48918e-10
chr6:29697284:A:T	6:29665061:A:T	A	T	0.464261	0.546374	6.32691e-11
chr6:29765036:G:T	6:29732813:G:T	G	T	0.250235	0.754793	0.000332412
chr6:29800272:G:A	6:29768049:G:A	G	A	0.282216	0.707162	7.43933e-13
chr6:29802052:T:C	6:29769829:T:C	T	C	0.282193	0.726457	3.05298e-09
chr6:29827644:G:A	6:29795421:G:A	G	A	0.496914	0.499124	0.0149866
chr6:29864555:A:G	6:29832332:A:G	A	G	0.819692	0.176619	0.00301375
chr6:29946622:G:A	6:29914399:G:A	G	A	0.32028	0.684563	0.00133986
chr6:29998161:C:T	6:29965938:C:T	C	T	0.0569713	0.940282	0.000354724
chr6:30001263:T:C	6:29969040:T:C	T	C	0.0587832	0.943033	0.0172791
chr6:30002041:T:C	6:29969818:T:C	T	C	0.0569667	0.944572	0.0394575
chr6:30006377:G:A	6:29974154:G:A	G	A	0.0569684	0.946237	1.8179e-05
chr6:30013738:C:T	6:29981515:C:T	C	T	0.0570375	0.944807	0.0136209
chr6:30078763:T:C	6:30046540:T:C	T	C	0.0569904	0.945811	0.000164655
chr6:30089208:A:G	6:30056985:A:G	A	G	0.0569916	0.944598	0.0332161
chr6:30235825:C:T	6:30203602:C:T	C	T	0.421238	0.57419	0.00446662
chr6:30397543:C:T	6:30365320:C:T	C	T	0.781304	0.214447	0.00157629
chr6:30399405:C:T	6:30367182:C:T	C	T	0.419344	0.573961	3.2582e-05
chr6:30469199:T:G	6:30436976:T:G	T	G	0.150136	0.867446	7.02709e-54
chr6:30828329:A:C	6:30796106:A:C	A	C	0.858833	0.143562	0.0351098
chr6:30831266:C:T	6:30799043:C:T	C	T	0.565117	0.423204	5.30712e-13
chr6:30992490:T:C	6:30960267:T:C	T	C	0.158792	0.844816	0.00229405
chr6:31112809:A:G	6:31080586:A:G	A	G	0.102762	0.8998	0.00897101
chr6:31127517:A:G	6:31095294:A:G	A	G	0.530003	0.476308	0.000100083
chr6:31138722:G:A	6:31106499:G:A	G	A	0.137434	0.865564	0.00738198
chr6:31140708:G:A	6:31108485:G:A	G	A	0.717666	0.278288	0.00559926
chr6:31207267:T:C	6:31175044:T:C	T	C	0.479338	0.527557	2.15595e-05
chr6:31210502:T:C	6:31178279:T:C	T	C	0.46154	0.545178	3.26081e-05
chr6:31216648:G:A	6:31184425:G:A	G	A	0.0779285	0.917901	2.76997e-06
chr6:31228814:G:A	6:31196591:G:A	G	A	0.0631316	0.939027	0.00580061
chr6:31243273:A:G	6:31211050:A:G	A	G	0.793748	0.201489	0.000267916
chr6:31274414:A:G	6:31242191:A:G	A	G	0.226145	0.786335	3.75265e-20
chr6:31291360:T:C	6:31259137:T:C	T	C	0.113475	0.889735	0.00178579
chr6:31305076:C:A	6:31272853:C:A	C	A	0.113017	0.884625	0.0222509
chr6:31306237:G:A	6:31274014:G:A	G	A	0.103243	0.894519	0.0248778
chr6:31333559:A:C	6:31301336:A:C	A	C	0.339415	0.664547	0.00990778
chr6:31334434:A:G	6:31302211:A:G	A	G	0.665453	0.337668	0.0425297
chr6:31336198:G:A	6:31303975:G:A	G	A	0.0725142	0.930835	6.29295e-05
chr6:31337507:A:G	6:31305284:A:G	A	G	0.472869	0.533798	4.03651e-05
chr6:31341238:G:C	6:31309015:G:C	G	C	0.331708	0.675949	5.33009e-07
chr6:31344755:G:A	6:31312532:G:A	G	A	0.774002	0.222244	0.00552737
chr6:31351504:A:G	6:31319281:A:G	A	G	0.088395	0.913818	0.0157316
chr6:31352785:T:C	6:31320562:T:C	T	C	0.837256	0.159247	0.00341571
chr6:31517397:C:A	6:31485174:C:A	C	A	0.694682	0.299438	7.983e-05
chr6:32223264:G:A	6:32191041:G:A	G	A	0.309391	0.685502	0.000698654
chr6:32344860:T:G	6:32312637:T:G	T	G	0.756156	0.250636	1.52939e-06
chr6:32375937:T:C	6:32343714:T:C	T	C	0.720314	0.284467	0.00107484
chr6:32378924:G:A	6:32346701:G:A	G	A	0.263242	0.733531	0.0246631
chr6:32393072:G:T	6:32360849:G:T	G	T	0.203562	0.793102	0.0111944
chr6:32460285:C:T	6:32428062:C:T	C	T	0.291857	0.704547	0.0150713
chr6:32591439:A:G	6:32559216:A:G	A	G	0.620726	0.383171	0.0135179
chr6:32614658:G:A	6:32582435:G:A	G	A	0.445718	0.540857	1.82721e-16
chr6:32615682:A:C	6:32583459:A:C	A	C	0.11955	0.884452	0.000132233
chr6:32619388:T:G	6:32587165:T:G	T	G	0.393891	0.616528	6.16665e-11
chr6:32626375:T:C	6:32594152:T:C	T	C	0.297079	0.71362	6.02081e-13
chr6:32641284:T:A	6:32609061:T:A	T	A	0.0903346	0.912699	0.00101213
chr6:32653139:A:T	6:32620916:A:T	A	T	0.13938	0.867545	7.05627e-10
chr6:32655373:T:C	6:32623150:T:C	T	C	0.152001	0.855943	5.81174e-12
chr6:32660056:A:G	6:32627833:A:G	A	G	0.399283	0.604369	0.0217199
chr6:32660075:G:A	6:32627852:G:A	G	A	0.399278	0.590453	1.31483e-10
chr6:32665041:T:G	6:32632818:T:G	T	G	0.171861	0.841242	2.95872e-27
chr6:32665685:T:A	6:32633462:T:A	T	A	0.193755	0.811862	1.07624e-05
chr6:32668106:C:T	6:32635883:C:T	C	T	0.169352	0.826571	0.000892794
chr6:32685759:C:A	6:32653536:C:A	C	A	0.263321	0.747787	8.19116e-15
chr6:32686126:A:G	6:32653903:A:G	A	G	0.252247	0.751842	0.00363071
chr6:32687480:C:T	6:32655257:C:T	C	T	0.264817	0.729916	0.000270695
chr6:32693007:C:G	6:32660784:C:G	C	G	0.546845	0.468956	4.69691e-22
chr6:32700249:C:T	6:32668026:C:T	C	T	0.12664	0.877537	0.000107584
chr6:32701990:T:C	6:32669767:T:C	T	C	0.376587	0.635614	9.45805e-15
chr6:32704662:T:C	6:32672439:T:C	T	C	0.103412	0.901463	7.99789e-07
chr6:32706623:T:C	6:32674400:T:C	T	C	0.26412	0.740753	0.000639995
chr6:32711955:A:G	6:32679732:A:G	A	G	0.265282	0.747734	1.1787e-19
chr6:32735331:C:G	6:32703108:C:G	C	G	0.136851	0.860166	0.00800519
chr6:32740727:C:G	6:32708504:C:G	C	G	0.799814	0.207069	1.76007e-07
chr6:32772894:G:C	6:32740671:G:C	G	C	0.674651	0.331474	5.79301e-05
chr6:32776273:G:A	6:32744050:G:A	G	A	0.69876	0.297047	0.00478123
chr6:32792557:A:G	6:32760334:A:G	A	G	0.662702	0.340869	0.0205981
chr6:32823522:C:A	6:32791299:C:A	C	A	0.359194	0.648188	2.12259e-06
chr6:32975311:A:T	6:32943088:A:T	A	T	0.066251	0.935387	0.0419844
chr6:33017422:C:T	6:32985199:C:T	C	T	0.132566	0.871125	0.000717943
chr6:33549832:T:G	6:33517609:T:G	T	G	0.262855	0.74523	1.51277e-08
chr6:33883275:C:A	6:33851052:C:A	C	A	0.129313	0.876391	1.25316e-07
chr6:35025252:A:C	6:34993029:A:C	A	C	0.0543575	0.947727	0.00455665
chr6:35580459:G:A	6:35548236:G:A	G	A	0.459184	0.544428	0.0254474
chr6:36394664:A:C	6:36362441:A:C	A	C	0.248365	0.755391	0.00724974
chr6:36651044:C:T	6:36618821:C:T	C	T	0.224959	0.771499	0.00931061
chr6:36679512:G:A	6:36647289:G:A	G	A	0.199273	0.797704	0.020394
chr6:3693987:T:C	6:3694221:T:C	T	C	0.0624	0.939423	0.0193622
chr6:37558784:C:T	6:37526560:C:T	C	T	0.0991265	0.897211	0.000199703
chr6:3959999:T:A	6:3960233:T:A	T	A	0.0846165	0.917165	0.0475166
chr6:41562940:C:G	6:41530678:C:G	C	G	0.0711596	0.939639	1.25453e-40
chr6:41820642:T:G	6:41788380:T:G	T	G	0.139102	0.86348	0.0208168
chr6:42008108:C:T	6:41975846:C:T	C	T	0.18278	0.814702	0.0456014
chr6:43165821:C:A	6:43133559:C:A	C	A	0.0899029	0.907457	0.00495275
chr6:44321818:A:G	6:44289555:A:G	A	G	0.110609	0.893705	2.05358e-05
chr6:4434616:A:G	6:4434850:A:G	A	G	0.524881	0.484788	2.67192e-09
chr6:4461937:T:C	6:4462171:T:C	T	C	0.279315	0.724213	0.0152046
chr6:45412387:A:C	6:45380124:A:C	A	C	0.130329	0.848979	4.1373e-73
chr6:45617004:G:T	6:45584741:G:T	G	T	0.156453	0.839525	0.000748018
chr6:45730748:A:G	6:45698485:A:G	A	G	0.081161	0.920629	0.0421045
chr6:46707288:C:A	6:46675025:C:A	C	A	0.791509	0.203222	5.97185e-05
chr6:46833334:G:T	6:46801071:G:T	G	T	0.431053	0.565603	0.0382946
chr6:48816971:G:A	6:48784608:G:A	G	A	0.119834	0.876351	0.000362098
chr6:50237488:A:G	6:50205201:A:G	A	G	0.0976085	0.9044	0.0369701
chr6:5057165:A:G	6:5057399:A:G	A	G	0.158528	0.844327	0.0163862
chr6:52614920:T:C	6:52479718:T:C	T	C	0.0768985	0.928831	2.74736e-11
chr6:528932:T:C	6:528932:T:C	T	C	0.794931	0.195326	1.20868e-13
chr6:5587475:G:A	6:5587708:G:A	G	A	0.814929	0.181009	0.00119764
chr6:65512005:A:G	6:66221898:A:G	A	G	0.128116	0.878965	8.33323e-11
chr6:66454735:A:T	6:67164628:A:T	A	T	0.79373	0.209313	0.0209515
chr6:6975868:G:T	6:6976101:G:T	G	T	0.0755217	0.926258	0.0366538
chr6:70619562:T:C	6:71329265:T:C	T	C	0.289641	0.71563	0.000340126
chr6:72448644:A:G	6:73158346:A:G	A	G	0.47892	0.525818	0.00359404
chr6:73031141:G:A	6:73740864:G:A	G	A	0.0823108	0.92013	0.00576707
chr6:73272775:C:T	6:73982498:C:T	C	T	0.147692	0.855353	0.00792961
chr6:73350204:G:C	6:74059927:G:C	G	C	0.132291	0.872389	2.04884e-05
chr6:74733747:C:A	6:75443463:C:A	C	A	0.819161	0.185017	0.000905936
chr6:7542041:T:C	6:7542274:T:C	T	C	0.0681514	0.934707	0.000423642
chr6:76122334:G:A	6:76832051:G:A	G	A	0.28296	0.710723	1.83565e-05
chr6:78718307:G:A	6:79428024:G:A	G	A	0.204559	0.798579	0.0163143
chr6:80669346:G:A	6:81379063:G:A	G	A	0.485075	0.519117	0.00973654
[truncated: 346 more rows]
