# Supplementary material for: Discordant calls across genotype discovery approaches elucidate variants with systematic errors
Source: HighWire-hosted journal article supplement (doi:10.1101/gr.277908.123), 2023-05-30
Supplement: Supplemental_Material_.pdf [file Supplemental_Material_.pdf]

## Supplemental Materials

### Discordant genotype calls across technology platforms elucidate variants with systematic errors in next-generation sequencing

Elizabeth G. Atkinson\*, Mykyta Artomov\*, Konrad J. Karczewski, Alexander A. Loboda, Heidi L.

Rehm, Daniel G. MacArthur, Benjamin M. Neale\*, Mark J. Daly\*

### Supplemental Figures

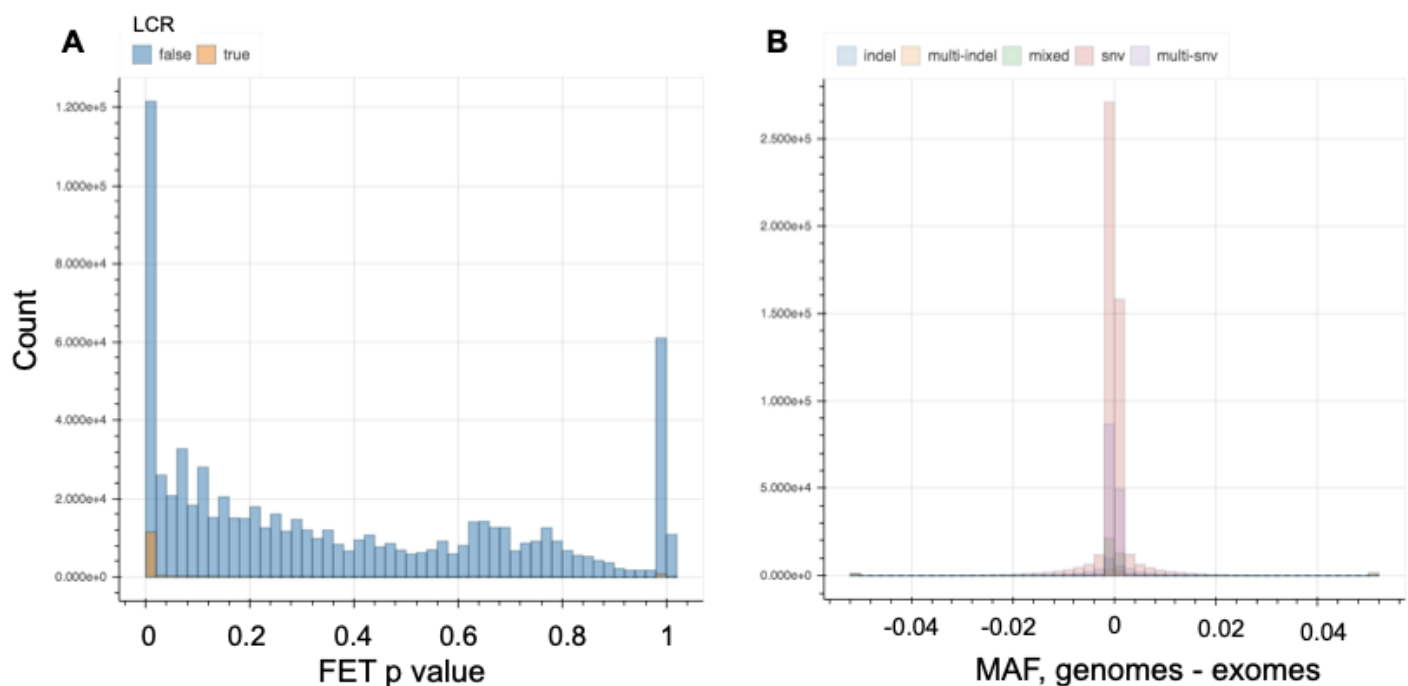

### Supplemental Figure S1. The signal of discordance is consistent across AC thresholds. (A)

FET p value for variants with at AC > 1. Variants falling in the low complexity region (LCR) are indicated with orange and are enriched in the worst performing bin. (B) Distribution of allele

frequencies in the NFE exomes vs genomes at AC>5. Variants are colored by variant type. Both panels show results for the NFE.

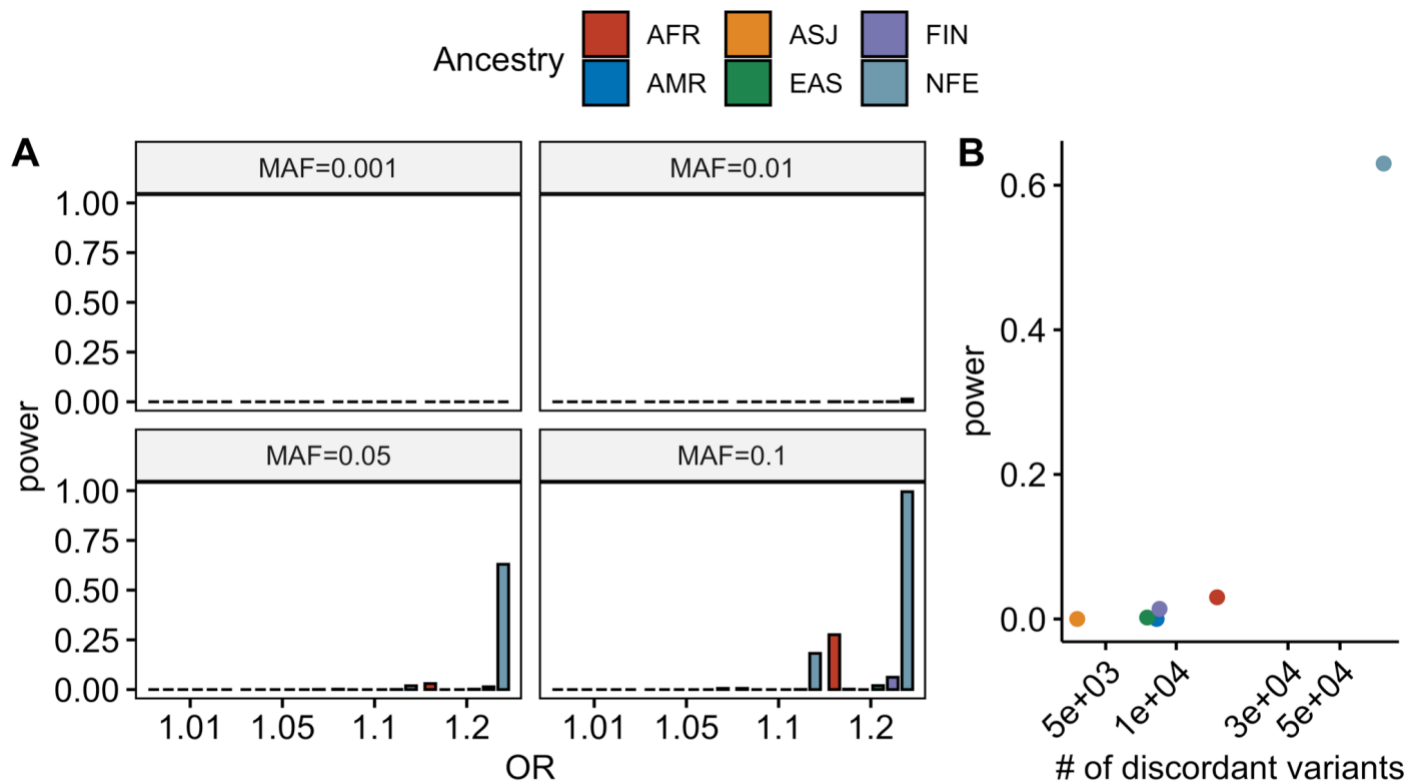

**Supplemental Figure S2. Power to detect variants with discordant allele frequencies between sequencing platforms. (A)** Fisher's exact test power evaluated for the number of samples in gnomAD WES and WGS datasets for each ancestry given a particular MAF cutoff; **(B)** Fisher's exact test power for MAF=0.05 and OR=1.2 and the observed number of discordant variants ( $p < 1 \times 10^{-5}$ ) for each ancestry. Note that due to sample size the NFE are the most highly powered for identifying discordant variants.

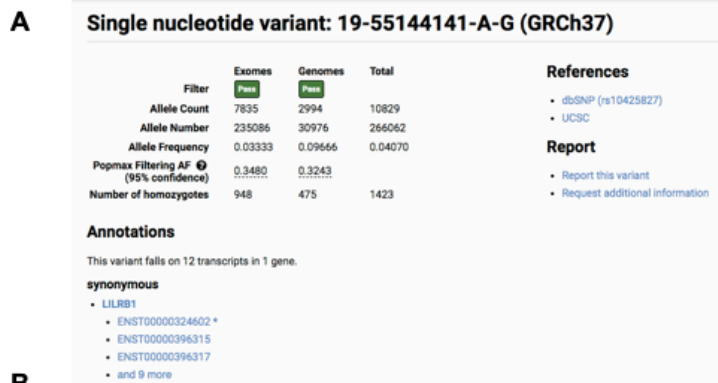

**B**

|   | 0                    | 1                 | 2                     | 3                 | 4                     |
|---|----------------------|-------------------|-----------------------|-------------------|-----------------------|
| 0 | Missing variant both | Missing variant G | Missing variant G     | Missing variant G | Missing variant G     |
| 1 | Missing variant E    | No call both      | No call G             | No call G         | No call G             |
| 2 | Missing variant E    | No call E         | ref/ref both          | Hom ref G / Het E | Hom ref G / Hom Var E |
| 3 | Missing variant E    | No call E         | Het G / Hom ref E     | het both          | Het G / Hom var E     |
| 4 | Missing variant E    | No call E         | Hom var G / hom ref E | Hom var G / het E | hom var both          |

**Supplemental Figure S3. Examples of discordance. (A)** Example of a discordant variant as seen in the gnomAD browser. Note that this variant is PASS in both the Exomes and Genomes, but that there is a sizable MAF difference depending on technology. **(B)** Concordance table. The miscall categories considered as discordant here are shown in white. Gray indicates variants that were excluded from the concordance test due to missing information in one of the two datasets. Red indicates no alternative alleles were observed in either dataset. Green indicates concordant calls when alternative alleles were observed.

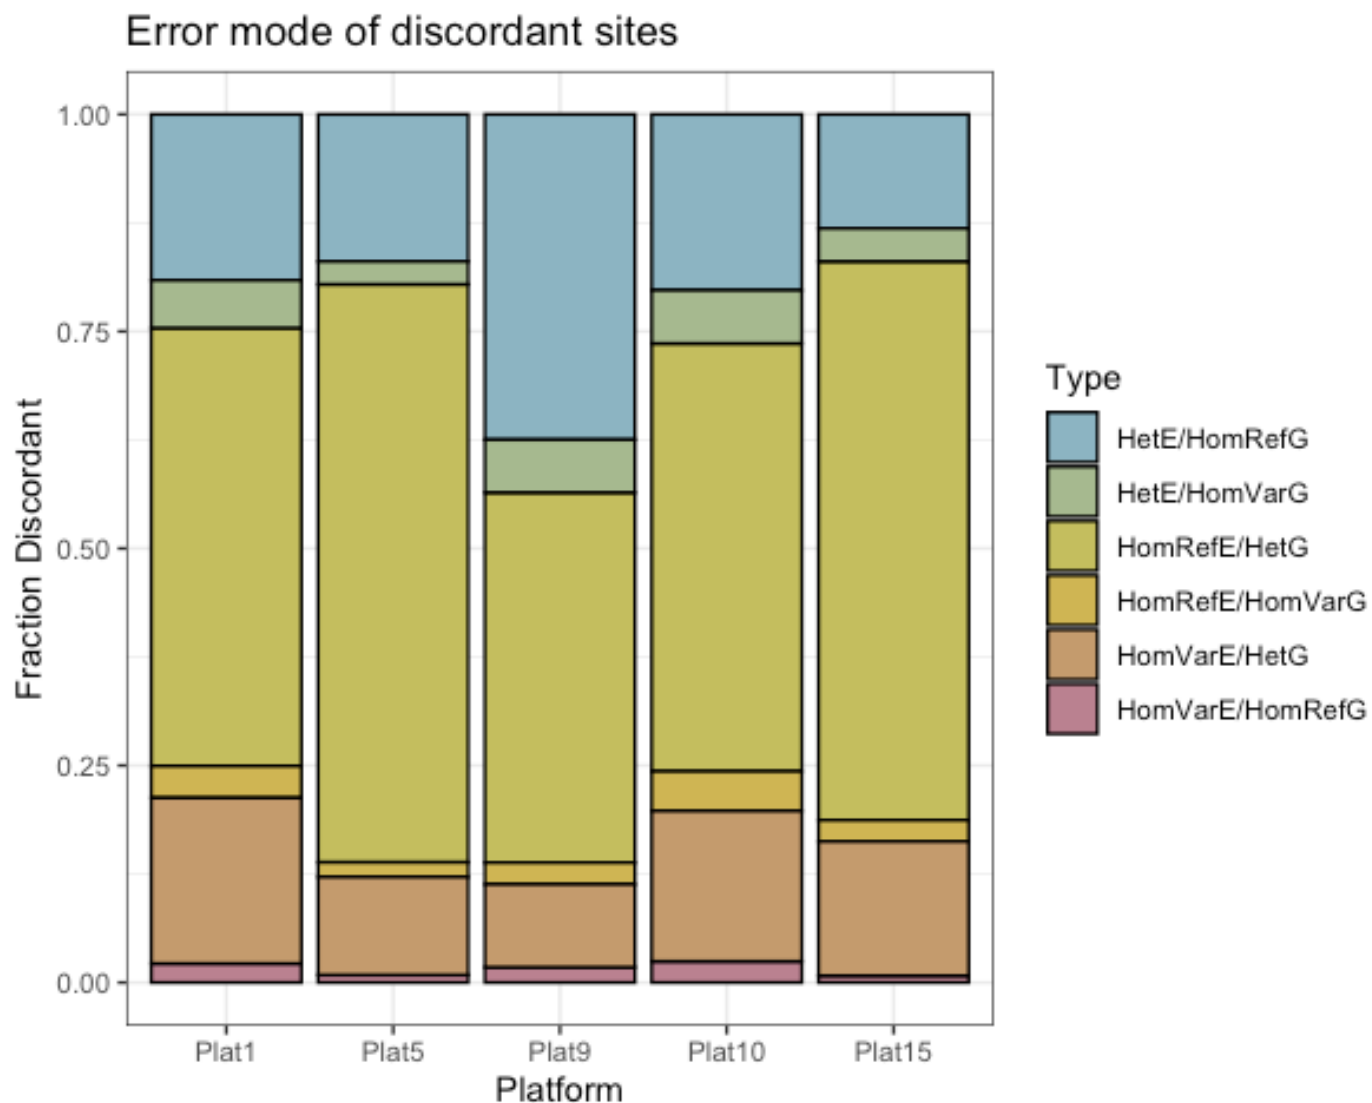

**Supplemental Figure S4. Wrong call error mode by technology platform.** The proportion of wrong calls in each error mode category are shown for each gnomAD sequencing platform for which overlapping data was available.

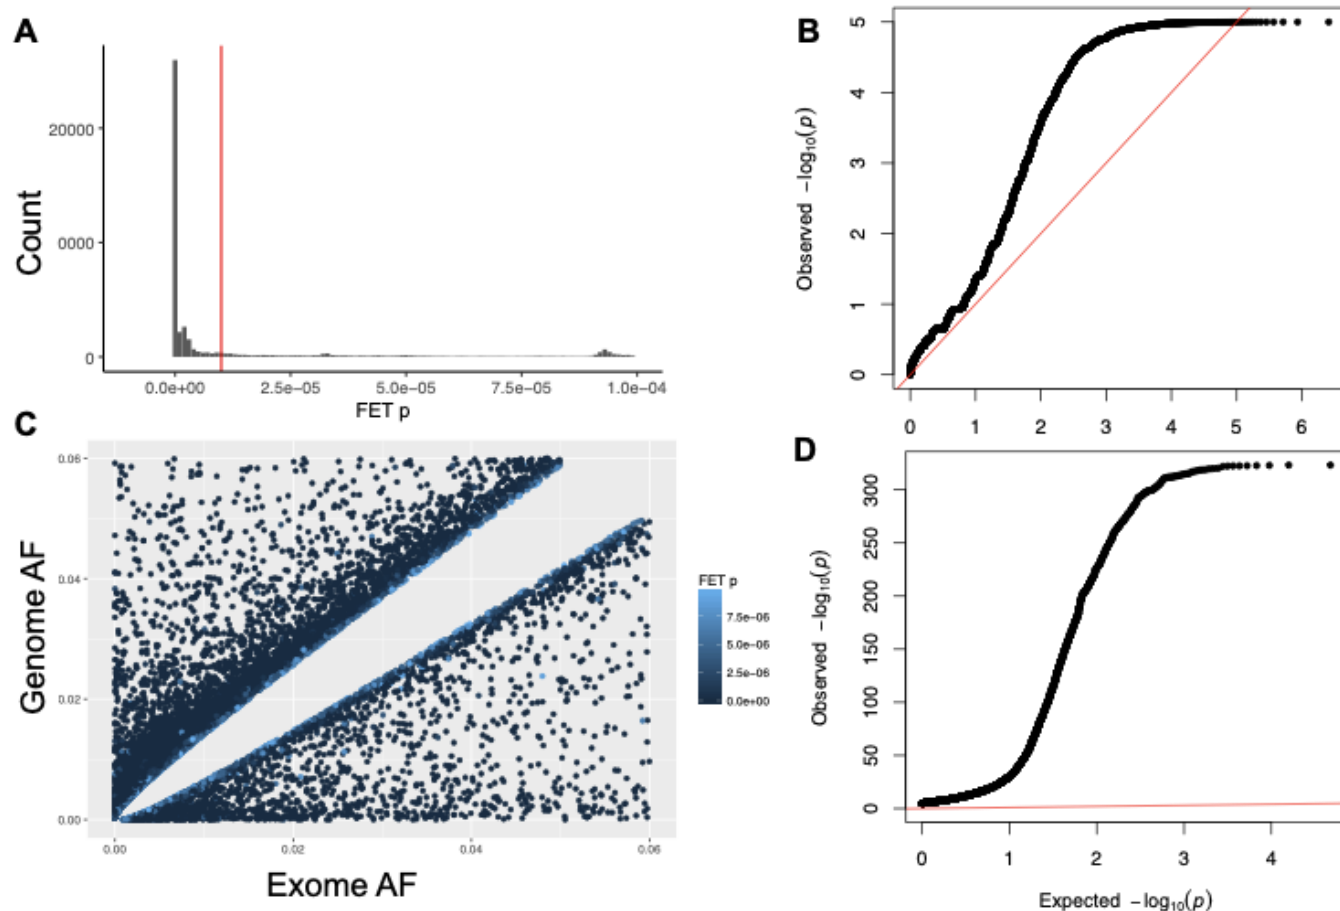

**Supplemental Figure S5. Selection of 1e-5 as the threshold for 'good' vs 'bad' variants. (A)**

Concordance FET  $p$  value for AC>10 highlighting 1e-5, indicated with the red line, which was chosen as the threshold for NFE variants considered to be discordant. **(B)** QQ plot for the concordance test for all NFE variants. **(C)** Exomes vs genomes AF for bad NFE variants failing the 1e-5 threshold. **(D)** QQ plot for just the bad variants.

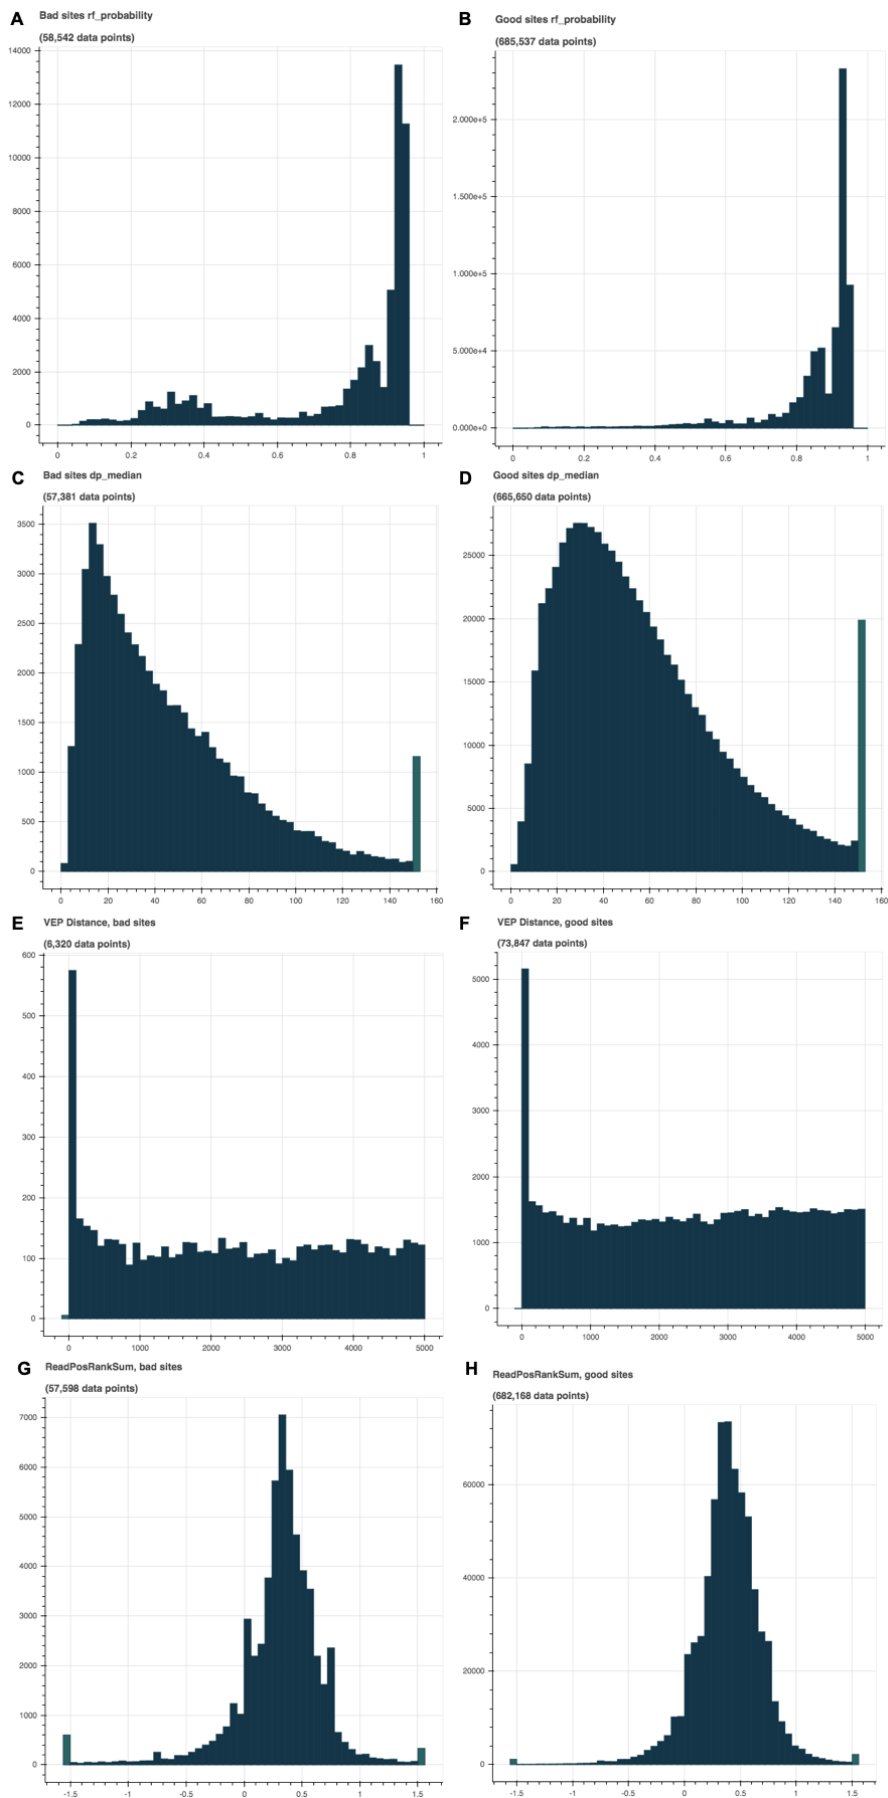

**Supplemental Figure S6. Distribution of gnomAD exomes metadata features for good versus bad variants.** Bad variant distributions are presented on the left, good on the right. **(A,B)**

RF\_Probability, the confidence of the random forest genotyper implemented with gnomAD. **(C,D)**

DP\_Median, the median depth of exomes. **(E,F)** VEP Distance, the distance to the closest canonical gene. **(G,H)** ReadPosRankSum, how far along sequencing reads the variant is falling.

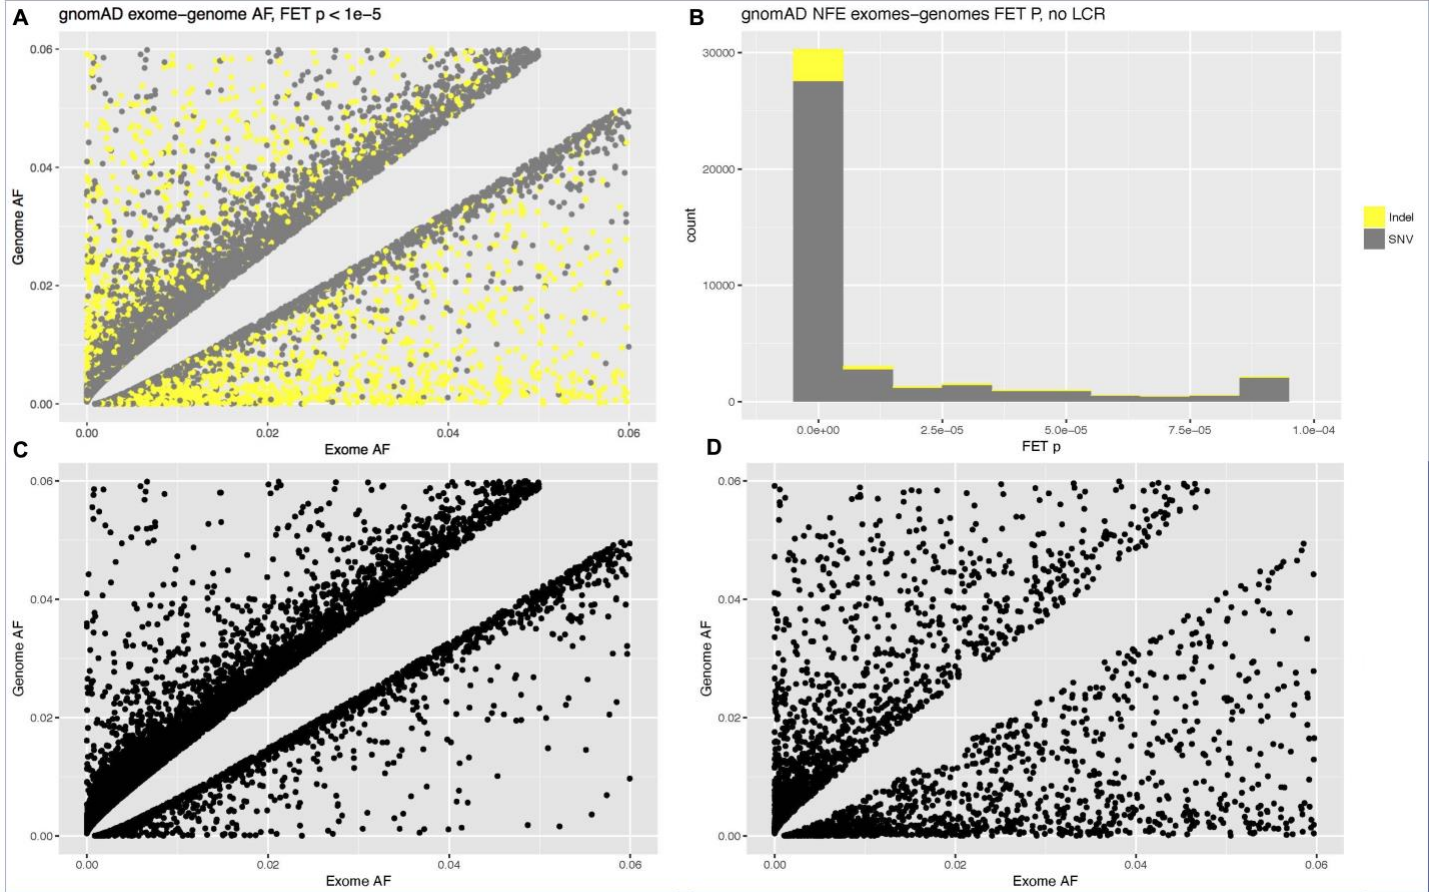

**Supplemental Figure S7. Different patterns of discordance in SNVs as compared to indels. (A)** Allele frequencies in the exomes vs genomes for SNVs vs indels. Note an enrichment for indels at particularly discordant allele frequencies and a trend for SNVs to have higher AF in the genomes as compared to exomes. **(B)** FET  $p$  value for variants after excluding the LCR region. **(C)** Exomes vs genomes AF for bad NFE SNV variants failing the  $1e-5$  threshold. **(D)** Exomes vs genomes AF for indel bad NFE indels failing the  $1e-5$  threshold.



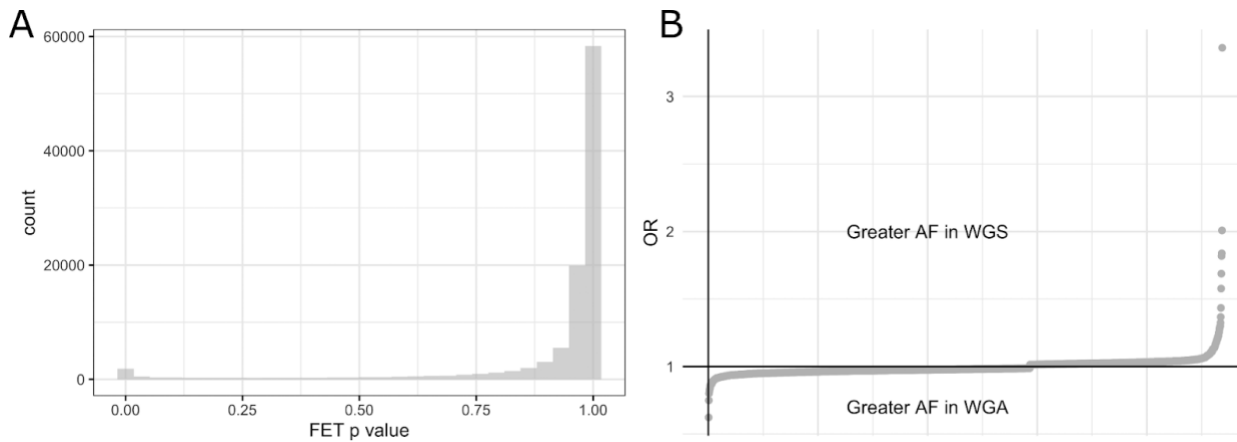

**Supplemental Figure S8. Analysis of variant allele frequency concordance between whole genome sequencing and microarray data in the All of Us cohort.** (A) Distribution of the Fisher's exact test  $P$ -values for the allele frequency comparison between the whole genome sequencing and microarray genotyping for the same individuals from All of Us cohort. The distribution is centered at 1 as the analysis cohort was subsampled to the individuals with both whole genome sequencing (WGS) and whole genome array (WGA) data available. (B) Odds ratios for allele frequency concordance analysis between WGS and WGA datasets.

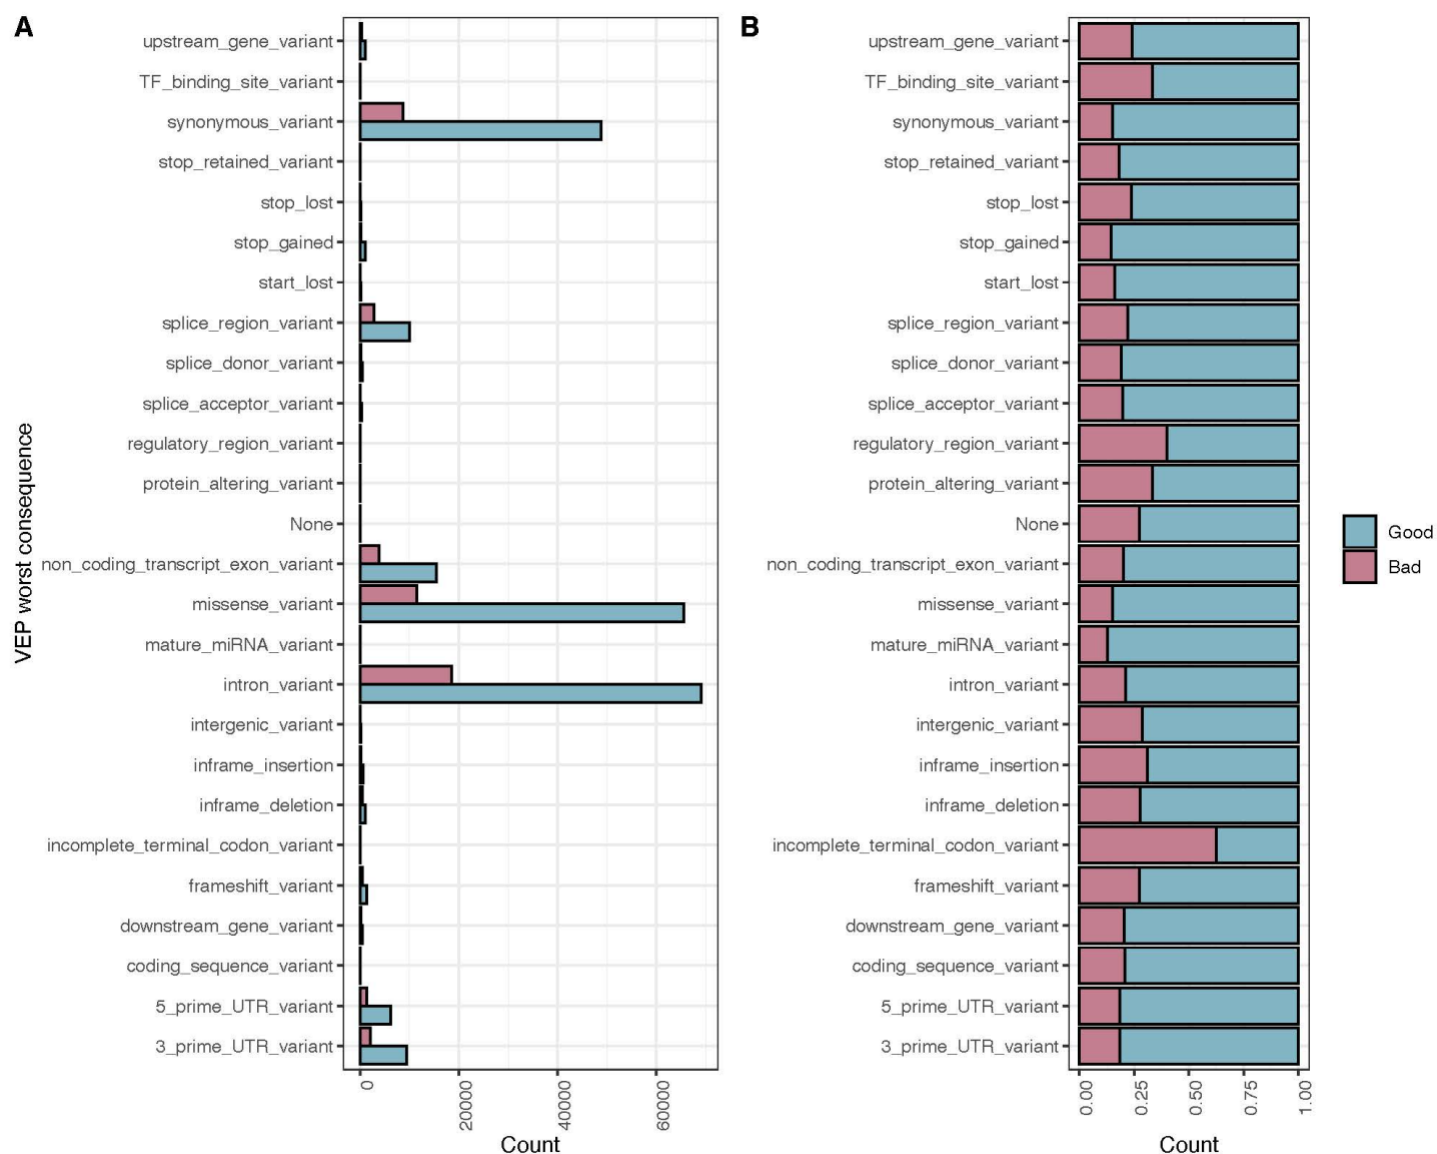

**Supplemental Figure S9. VEP predicted worst consequence for ‘good’ versus ‘bad’ variants with  $MAF > 0.01$  after an  $AC > 10$  filter.** Note the presence of many bad variants that are predicted to have severe functional consequences. (A) Absolute count; (B) proportion of total in each category

## Supplemental Tables

| Population     | Fraction bad sites shared with NFE |
|----------------|------------------------------------|
| AFR            | 0.745                              |
| AMR            | 0.865                              |
| ASJ            | 0.992                              |
| EAS            | 0.803                              |
| FIN            | 0.938                              |
| <b>Average</b> | <b>0.869</b>                       |

**Supplemental Table S1.** Large overlap in discordant sites between NFE and other continental ancestry groups.

|                                  |
|----------------------------------|
| Low complexity region membership |
| segdup                           |
| nonpar                           |
| variant_type                     |
| allele_type                      |
| was_mixed                        |
| has_star                         |
| qd                               |
| info_SOR                         |
| rf_probability                   |
| was_split                        |
| score                            |
| qual                             |
| BaseQRankSum                     |
| ClippingRankSum                  |
| FS                               |
| InbreedingCoeff                  |
| MQ                               |
| MQRankSum                        |
| ReadPosRankSum                   |

**Supplemental Table S2.** Features of the gnomADv2 variant annotations used in the random forest prediction model.

| Ancestry | AFR | AMR | EAS | EUR | SAS |
|----------|-----|-----|-----|-----|-----|
| #Samples | 296 | 222 | 422 | 351 | 102 |

**Supplemental Table S3.** 1000 Genomes samples per ancestry included into testing dataset.

| VEP_worst_consequence              | All   | Bad   | Good  |
|------------------------------------|-------|-------|-------|
| 3_prime_UTR_variant                | 11519 | 2130  | 9380  |
| 5_prime_UTR_variant                | 7602  | 1399  | 6175  |
| coding_sequence_variant            | 35    | 7     | 27    |
| downstream_gene_variant            | 596   | 121   | 475   |
| frameshift_variant                 | 1833  | 494   | 1312  |
| incomplete_terminal_codon_variant  | 8     | 5     | 3     |
| inframe_deletion                   | 1485  | 410   | 1075  |
| inframe_insertion                  | 791   | 244   | 547   |
| intergenic_variant                 | 263   | 75    | 188   |
| intron_variant                     | 87799 | 18589 | 69116 |
| mature_miRNA_variant               | 95    | 12    | 83    |
| missense_variant                   | 77243 | 11536 | 65588 |
| non_coding_transcript_exon_variant | 19353 | 3858  | 15463 |
| regulatory_region_variant          | 50    | 20    | 30    |
| splice_acceptor_variant            | 467   | 91    | 370   |
| splice_donor_variant               | 554   | 106   | 446   |
| splice_region_variant              | 12916 | 2842  | 10053 |
| start_lost                         | 277   | 44    | 232   |
| stop_gained                        | 1257  | 180   | 1077  |
| stop_lost                          | 195   | 46    | 148   |
| stop_retained_variant              | 72    | 13    | 59    |
| synonymous_variant                 | 57514 | 8703  | 48755 |
| TF_binding_site_variant            | 3     | 1     | 2     |
| upstream_gene_variant              | 1341  | 323   | 1013  |
| None                               | 10    | 3     | 8     |
| protein_altering_variant           | 9     | 3     | 6     |

**Supplemental Table S4. Counts for good and bad variants within VEP categories (AC >10).**

Note the substantial numbers of bad variants with severe predicted consequences.

| Chromosome | Position  |
|------------|-----------|
| 4          | 3494956   |
| 5          | 33963745  |
| 6          | 31852866  |
| 6          | 151687847 |
| 9          | 712766    |
| 9          | 4576774   |
| 9          | 5126343   |
| 9          | 5185581   |
| 11         | 308180    |
| 11         | 308290    |
| 11         | 308314    |
| 11         | 309127    |
| 11         | 828916    |
| 18         | 618124    |
| 18         | 662103    |
| 19         | 844020    |
| 19         | 913048    |

**Supplemental Table S5.** Discordant variants seen at genome-wide significance in the GWAS catalog.

## Supplemental File Legends

**Supplemental File S1.** List of the 2,344 variants which were found to have Fisher's exact test  $P < 0.05$  in the All of Us Research Program dataset.

**Supplemental File S2.** Source code for the *DNAdiscover* package described in this manuscript for prediction of the presence of technical bias in variants coming from high-throughout sequencing. This code, alongside a user manual, is also available at <https://github.com/na89/DNAdiscover>.
